# Supplementary material for: Strand-specific RNA-seq analysis of the Lactobacillus delbrueckii subsp. bulgaricus transcriptome
Source: Royal Society of Chemistry journal article supplement (doi:10.1039/c5mb00547g), 2015-12-08
Supplement: c5mb00547g2.xlsx [file c5mb00547g2.xlsx]

## Sheet: Table S1
Table S1. The primers for qRT-PCR analysis with target gene information
Gene	Product	Primer (5'-3')	Length (bp)
LBU_1062	DNA-directed RNA polymerase sigma subunit	AAGGCTGAAGAAGAAGCTGAAA	222
		AATGGAGACAACCAAACGGA
LBU_0342	translation initiation factor IF-1	AGTCGAATTGGAAAACGGTG	123
		TTAGTCAAGTCATATGGAGACAGCT
LBU_0669	elongation factor Tu	GACGGTCCTATGCCACAAACT	163
		GGTAACCGTATTCTGAAAGCAAGT
LBU_0869	putative formate-tetrahydrofolate ligase	AAAGGTAGCCAAGCGGATCT	232
		AGTTGAAACGACCACGAAGC
LBU_1429	conserved hypothetical protein	GATGCCCTTTGGGACTACTTC	117
		CTCGTTGACAAATGCGATGAT
LBU_1514	helicase	CACTGCCTACATCGGTTCCT	218
		TTGCCTTATGCCGGTTCA
LBU_1788	pyruvate oxidase	GGTTTCCCAGGTGGTTCTTTT	216
		GGTCTTGTCGTACTTAGCGTCGT

## Sheet: Table S2
Table S2. Gene expression of Lb.bulgaricus 2038 genome
				RPKM				lag vs control			logarithmic vs lag			stationary vs logarithmic			Low expression
Gene	Length	Annotation	KO	control	lag	logarithmic	stationary	log2(Fold_change)normalized	FDR	Results	log2(Fold_change) normalized	FDR	Results	log2(Fold_change) normalized	FDR	Results
LBU_0001	1365	chromosomal replication initiator protein DnaA	K02313	87.0776	79.1698	161.951	106.523	-0.137352	0.126712		1.03253	7.24869e-99	UP	-0.604386	2.64102e-43
LBU_0002	1128	DNA polymerase III beta subunit	K02338	205.2	128.041	345.756	178.515	-0.680431	1.35302e-23		1.43315	4.08979e-289	UP	-0.953707	4.75627e-164
LBU_0003	288	S4-like RNA binding protein		352.977	274.223	111.488	118.871	-0.364224	0.000220733		-1.29846	9.92949e-52	DOWN	0.0925145	0.383165
LBU_0004	1146	DNA replication and repair protein RecF	K03629	326.848	597.128	346.144	322.698	0.86942	6.68053e-102		-0.786668	7.12729e-192		-0.101186	0.000882515
LBU_0005	1962	DNA gyrase B subunit	K02470	235.152	370.443	209.755	219.982	0.655657	8.92836e-67		-0.820544	6.89716e-219		0.0686797	0.0185256
LBU_0006	2472	DNA gyrase A subunit	K02469	279.64	402.457	229.372	204.046	0.525263	1.65007e-61		-0.811142	3.28944e-293		-0.168799	3.56349e-11
LBU_0007	294	30S ribosomal protein S6	K02990	5891.44	4675.26	12980.8	1303.93	-0.333574	1.55839e-46		1.47326	0	UP	-3.31543	0	DOWN
LBU_0008	576	single-strand binding protein	K03111	2781.73	3487.56	9489.17	949.337	0.326238	1.32159e-51		1.44406	0	UP	-3.32129	0	DOWN
LBU_0009	237	30S ribosomal protein S18	K02963	10683.8	4159.9	12471.1	1248.47	-1.3608	0	DOWN	1.58397	0	UP	-3.32035	0	DOWN
LBU_0010	2034	putative signaling protein		131.483	206.375	187.506	197.444	0.65039	1.33961e-38		-0.13833	6.56168e-06		0.0745076	0.0137423
LBU_0011	456	ribosomal protein L9	K02939	344.688	438.341	450.614	467.372	0.346762	6.64491e-07		0.039836	0.365681		0.0526819	0.208248
LBU_0012	1371	replicative DNA helicase	K02314	241.838	270.453	274.217	234.958	0.161337	0.00125713		0.0199441	0.542133		-0.222914	1.70225e-12
LBU_0013	693	hypothetical protein		157.976	197.262	100.614	180.775	0.320412	0.000144974		-0.971285	5.54377e-56		0.845368	3.94407e-44
LBU_0014	2106	ABC-type transport system ATP-binding protein		151.866	142.988	230.242	191.632	-0.086906	0.109597		0.687257	3.81742e-108		-0.26481	2.65114e-21
LBU_0015	705	putative Mg2+ transporter-C family protein	K07507	303.918	211.474	242.73	490.805	-0.523206	3.38374e-14		0.198873	4.308e-05		1.0158	1.29347e-161	UP
LBU_0016	195	conserved hypothetical protein		553.401	444.633	375.779	280.227	-0.315711	0.000909013		-0.242729	0.000432052		-0.42329	1.1953e-08
LBU_0017	780	transposase		90.2284	203.086	179.619	178.94	1.17044	2.33966e-39	UP	-0.177146	0.000445084		-0.0054678	0.915904
LBU_0018	1179	ABC-type multidrug transport system ATP-binding and permease protein		61.6829	110.551	61.5985	8.05704	0.841765	1.75984e-19		-0.84374	1.69962e-42		-2.93457	1.02786e-145	DOWN
LBU_0019	639	ABC-type transport system ATP-binding protein	K02068	268.002	301.426	117.737	191.784	0.169557	0.0153917		-1.35624	2.92115e-132	DOWN	0.703913	7.17935e-32
LBU_0020	768	conserved hypothetical protein	K02069	285.097	292.669	135.333	238.192	0.0378181	0.574051		-1.11275	2.71737e-113	DOWN	0.815608	4.94171e-60
LBU_0021	1488	Lyzozyme M1		1720.04	1207.52	3664.41	4714.67	-0.510391	2.3905e-148		1.60153	0	UP	0.363576	0
LBU_0022	258	GNAT family acetyltransferase		63.6495	232.995	50.2863	58.6914	1.87208	2.7948e-30	UP	-2.21207	2.9248e-82	DOWN	0.222984	0.167633
LBU_0023	834	pyridoxine kinase	K00868	119.078	110.092	158.69	175.699	-0.113199	0.253715		0.527502	1.1372e-19		0.146891	0.00369124
LBU_0024	558	membrane protein		243.843	287.956	590.099	523.691	0.239897	0.00186129		1.03511	4.9247e-147	UP	-0.17224	2.91836e-07
LBU_0025	2766	putative helicase		17.5281	25.8	27.9332	33.4928	0.557699	4.22656e-06		0.114614	0.112188		0.261871	4.94108e-05
LBU_0026	696	integral membrane protein		6725.47	5010.06	695.326	1111.6	-0.424809	1.40422e-193		-2.84907	0	DOWN	0.676874	2.62283e-180
LBU_0027	480	membrane associated protein		433.347	720.397	73.9896	327.81	0.733271	3.01074e-39		-3.2834	0	DOWN	2.14747	3.02977e-221	UP
LBU_0028	429	putative transcriptional regulator		1573.07	1780.28	375.407	1057.15	0.178518	2.54004e-07		-2.24557	0	DOWN	1.49366	0	UP
LBU_0029	228	nmrA-like family protein		6.85947	10.4664	5.40418	7.01265	0.609592	0.387405		-0.953612	0.0437826		0.375883	0.467558
LBU_0030	333	nucleoside-diphosphate-sugar epimerase		2.34829	11.2611	5.0061	3.95414	2.26167	0.00159288		-1.16959	0.00270725		-0.340324	0.499496
LBU_0031	189	4-oxalocrotonate tautomerase		11142.2	2548.07	910.406	867.866	-2.12856	0	DOWN	-1.48482	0	DOWN	-0.0690372	0.138816
LBU_0032	573	putative transcriptional regulator		17.7412	4.16463	3.41527	4.59591	-2.09085	5.83621e-07	DOWN	-0.286187	0.504942		0.42835	0.288812
LBU_0033	198	putative beta-glucosidase domain protein		225.115	347.218	132.879	63.6514	0.625176	5.46946e-07		-1.38572	8.04831e-50	DOWN	-1.06185	1.42967e-14	DOWN
LBU_0034	969	mannose-6-phosphate isomerase	K01809	548.758	706.318	141.145	94.8285	0.36415	2.18924e-22		-2.32315	0	DOWN	-0.573781	4.63782e-25
LBU_0035	204	putative fructokinases		613.317	486.29	82.4278	112.033	-0.334816	0.000151409		-2.56061	1.37368e-159	DOWN	0.442714	0.000998862
LBU_0036	171	hypothetical protein		118.897	152.842	18.6497	14.8503	0.362325	0.067591		-3.03482	3.03065e-51	DOWN	-0.328661	0.364059
LBU_0037	678	hypothetical protein		92.269	284.757	49.3888	38.0092	1.62582	1.15165e-77	UP	-2.52748	1.74554e-304	DOWN	-0.377834	0.000581475
LBU_0038	765	hypothetical protein		45.9988	50.2073	16.7698	14.2615	0.126301	0.435986		-1.58203	2.11988e-34	DOWN	-0.233742	0.184236
LBU_0039	783	hypothetical protein		18.9752	15.6738	5.64656	11.5313	-0.275766	0.29679		-1.47291	6.43999e-11	DOWN	1.03011	1.25298e-05	UP
LBU_0040	486	RNA polymerase sigma factor		4.82703	1.63672	2.9827	1.16114	-1.56033	0.0549764		0.865816	0.150056		-1.36108	0.0308908		RPKM<10
LBU_0041	723	glycerol uptake facilitator related permease		259.578	174.617	676.176	107.581	-0.571973	1.42303e-14		1.9532	0	UP	-2.65198	0	DOWN
LBU_0042	1137	sucrose phosphorylase	K00690	14.4429	20.6881	20.7176	4.88045	0.518444	0.014814		0.00205169	0.987469		-2.08577	3.01885e-33	DOWN
LBU_0043	1980	conserved hypothetical protein		45.418	60.2035	68.9655	29.2606	0.406583	8.69769e-06		0.196027	0.000321989		-1.23691	2.69385e-88	DOWN
LBU_0044	999	putative glycosyltransferase		54.7934	25.1384	68.4893	33.4219	-1.12411	1.19935e-13	DOWN	1.44598	8.9944e-53	UP	-1.03509	3.45852e-34	DOWN
LBU_0045	522	hypothetical protein		17.9765	25.9053	40.2665	42.1612	0.52713	0.062908		0.636334	2.10802e-05		0.0663384	0.617548
LBU_0046	798	EDD, DegV family domain protein		170.507	146.387	350.863	80.1446	-0.220045	0.00865174		1.26112	2.63453e-171	UP	-2.13023	0	DOWN
LBU_0047	483	EAL domain containing protein		4.85702	3.05849	15.0061	9.15206	-0.667248	0.351527		2.29466	1.15166e-11	UP	-0.713385	0.0044897
LBU_0048	585	Lysophospholipase L1 related esterase		78.8663	55.7491	74.0903	75.7239	-0.500462	0.000867215		0.410337	4.23507e-05		0.0314643	0.738623
LBU_0049	654	phosphoglycerate mutase	K15634	204.463	271.577	291.359	384.837	0.409524	4.17069e-08		0.101439	0.0261837		0.401447	4.97962e-24
LBU_0050	669	hypothetical protein		1087.06	1845.67	411.693	404.888	0.763721	1.27062e-146		-2.16451	0	DOWN	-0.0240479	0.516773
LBU_0051	558	biotin biosynthesis protein BioY		14.014	22.1975	30.1349	11.7986	0.663531	0.027734		0.441039	0.00666299		-1.35282	9.47315e-14	DOWN
LBU_0052	681	transposase		167.649	147.842	332.278	265.307	-0.181387	0.0478152		1.16833	3.4606e-123	UP	-0.32473	4.43185e-15
LBU_0053	228	conserved hypothetical protein		133.76	140.05	214.578	91.1644	0.0662985	0.713537		0.61556	2.55862e-10		-1.23496	1.52999e-32	DOWN
LBU_0054	714	putative hydrolase	K07025	63.5221	54.1118	143.843	49.1336	-0.231316	0.117751		1.41048	1.40057e-75	UP	-1.54971	1.96123e-93	DOWN
LBU_0055	174	inorganic diphosphatase		112.353	41.7967	253.262	103.782	-1.42658	1.09453e-07	DOWN	2.59917	5.4108e-73	UP	-1.28708	2.48798e-31	DOWN
LBU_0056	351	phosphoglycolate phosphatase		198.28	77.699	320.067	115.22	-1.35157	2.88561e-22	DOWN	2.0424	7.72623e-138	UP	-1.47398	6.80136e-95	DOWN
LBU_0057	828	exodeoxyribonuclease A	K01142	153.94	168.531	237.485	94.6199	0.130641	0.114688		0.494821	1.55965e-25		-1.32762	5.36673e-141	DOWN
LBU_0058	438	hypothetical protein		139.257	163.188	254.506	96.6288	0.228788	0.0502798		0.641166	3.07235e-23		-1.39718	5.06978e-87	DOWN
LBU_0059	909	L-lactate dehydrogenase	K00024	295.07	256.772	188.894	182.827	-0.20057	0.000695524		-0.442915	9.01382e-25		-0.0470934	0.314826
LBU_0060	858	aldo/keto reductase family oxidoreductase		2287.61	2806.83	267.533	388.814	0.295103	3.33288e-51		-3.39116	0	DOWN	0.539365	6.92447e-53
LBU_0061	2220	ribonucleoside-diphosphate reductase	K00525	1365.29	767.956	2307.27	6771.74	-0.830115	0		1.58709	0	UP	1.55334	0	UP
LBU_0062	804	membrane protein		4302.83	3198.03	3994.58	10290.7	-0.428104	2.59641e-145		0.320862	1.27419e-176		1.36523	0	UP
LBU_0063	549	membrane protein		1833.16	1781.93	1916.68	4411.19	-0.040892	0.181123		0.105168	4.51721e-08		1.20256	0	UP
LBU_0064	564	cobalamin adenosyltransferase	K00798	6656.53	6004.71	6647.05	18006.5	-0.148675	3.87668e-22		0.146619	5.4922e-47		1.43773	0	UP
LBU_0065	801	transposase		209.895	161.727	233.998	404.623	-0.3761	8.71515e-07		0.532931	1.01958e-27		0.790083	1.25119e-99
LBU_0066	1002	D-lactate dehydrogenase	K03778	17643.7	19349.8	8753.91	23143.5	0.133164	3.24705e-89		-1.14432	0	DOWN	1.40261	0	UP
LBU_0067	792	conserved hypothetical protein	K00104	284.356	2028.78	116.041	101.296	2.83484	0	UP	-4.12791	0	DOWN	-0.196054	0.00232133
LBU_0068	375	conserved hypothetical protein		108.434	262.118	25.8994	34.1095	1.27339	2.75217e-28	UP	-3.33922	8.45117e-205	DOWN	0.397256	0.0270474
LBU_0069	432	peptide deformylase	K01462	175.583	273.302	156.2	219.237	0.638341	1.83805e-11		-0.8071	6.24608e-36		0.489093	1.14768e-13
LBU_0070	882	ABC-type metal ion transport system substrate-binding protein		200.371	175.219	110.692	142.571	-0.193514	0.00819193		-0.662614	1.92241e-33		0.365132	7.18836e-11
LBU_0071	480	autoinducer-2 production protein LuxS	K07173	99.3766	138.492	109.172	159.301	0.47883	0.000116692		-0.343198	1.76936e-05		0.545142	1.82012e-13
LBU_0072	783	homoserine O-succinyltransferase		68.9101	35.8465	53.5035	67.7463	-0.942883	2.02617e-10		0.577801	3.34993e-08		0.340508	8.25838e-05
LBU_0073	1035	transposase		174.529	195.54	284.106	267.798	0.163997	0.0161983		0.538969	1.89925e-43		-0.0852835	0.0160703
LBU_0074	300	acyl-CoA dehydrogenase		28.6726	12.121	31.6494	5.95663	-1.24216	0.00172746		1.38467	4.31788e-08	UP	-2.40961	9.6655e-17	DOWN
LBU_0075	1578	ABC-type multidrug transport system ATP-binding and permease protein		19.822	5.11285	55.3932	13.8277	-1.95491	2.67902e-17	DOWN	3.43751	1.06386e-186	UP	-2.00215	3.94983e-113	DOWN
LBU_0076	1563	ABC-type multidrug transport system ATP-binding and permease protein	K02471	22.5138	31.4077	79.1572	15.6452	0.480309	0.000938923		1.3336	2.03875e-83	UP	-2.339	2.53211e-193	DOWN
LBU_0077	1170	tetratricopeptide repeat family protein		41.4382	31.1767	110.826	36.0935	-0.410492	0.00460197		1.82975	1.84386e-137	UP	-1.61848	4.23727e-125	DOWN
LBU_0078	1908	putative DNA mismatch repair protein		29.0988	29.3021	31.7193	14.9852	0.0100418	0.942813		0.114361	0.161783		-1.08182	1.42354e-32	DOWN
LBU_0079	702	hypothetical protein		197.166	258.835	272.676	357.183	0.392623	9.79012e-08		0.0751571	0.0986723		0.389475	1.03798e-22
LBU_0080	975	LysR family transcriptional regulator		17.6447	13.6362	8.17719	10.4181	-0.371793	0.130999		-0.737762	0.000118503		0.349411	0.0818258
LBU_0081	537	conserved hypothetical protein		10.1934	21.7959	2.8344	13.1358	1.09642	0.000920122	UP	-2.94294	3.7216e-23	DOWN	2.21238	1.10288e-11	UP
LBU_0082	594	conserved hypothetical protein		31.5951	90.487	13.7882	43.3843	1.51801	1.38901e-20	UP	-2.71427	7.77701e-93	DOWN	1.65374	7.30919e-27	UP
LBU_0083	939	putative glucokinase	K00845	702.033	668.255	327.2	243.293	-0.0711393	0.0576846		-1.03022	1.59352e-276	DOWN	-0.427479	2.07526e-32
LBU_0084	924	L-lactate dehydrogenase	K00016	643.187	749.449	390.245	759.338	0.220593	1.56895e-09		-0.94145	6.62052e-263		0.960362	2.78981e-297
LBU_0085	1227	major facilitator superfamily permease		160.602	116.876	106.504	74.0458	-0.458509	1.28637e-10		-0.13407	0.0111663		-0.524422	1.2706e-20
LBU_0086	543	sugar specific permease		11.5209	7.74307	5.87312	14.3763	-0.573272	0.177834		-0.398779	0.221868		1.29149	1.0971e-06	UP
LBU_0087	585	Succinate dehydrogenase		22.7242	70.5119	27.5051	82.3156	1.63364	9.03689e-18	UP	-1.35817	1.19944e-29	DOWN	1.58147	6.21076e-46	UP
LBU_0088	915	transcriptional regulator		152.977	219.57	65.1921	144.007	0.521361	2.59118e-13		-1.75191	8.67372e-200	DOWN	1.14338	1.93794e-75	UP
LBU_0089	1881	fumarate reductase flavoprotein subunit	K00014	7.89878	22.7753	12.3304	6.30013	1.52777	8.09052e-17	UP	-0.88525	4.01574e-16		-0.968765	2.23146e-11
LBU_0090	864	acyltransferase family protein		110.418	149.803	54.7792	19.0499	0.440089	5.85891e-07		-1.45137	6.57385e-99	DOWN	-1.52385	7.244e-43	DOWN
LBU_0091	603	glycosyl transferase		236.02	422.315	87.9852	58.802	0.839407	1.34341e-36		-2.26298	0	DOWN	-0.581396	8.49717e-11
LBU_0092	288	glucosyltransferase		92.317	110.873	40.0148	17.3082	0.264238	0.136502		-1.4703	4.57098e-26	DOWN	-1.20908	1.75418e-08	DOWN
LBU_0093	825	putative glycosyltransferase		132.7	166.113	94.2675	59.8513	0.324006	0.000120393		-0.817337	2.53951e-42		-0.655378	1.78134e-18
LBU_0094	777	1-acyl-sn-glycerol-3-phosphate acyltransferase		31.1987	51.3331	39.5513	9.80465	0.718405	1.66134e-05		-0.376164	0.000299505		-2.01219	4.79376e-41	DOWN
LBU_0095	729	putative response regulator	K07668	763.744	1023.34	526.447	1062.05	0.42212	1.53392e-31		-0.958922	7.03233e-292		1.0125	0	UP
LBU_0096	1908	two-component system sensor histidine kinase	K07652	63.5256	102.855	45.5467	163.211	0.695202	6.11849e-21		-1.17519	4.80101e-108	DOWN	1.84132	0	UP
LBU_0097	1548	yycH family protein		71.2268	68.5626	52.8146	140.227	-0.0549982	0.567988		-0.376485	2.94152e-09		1.40876	4.61344e-170	UP
LBU_0098	801	hypothetical protein		84.9341	130.943	90.7579	227.791	0.624518	5.45862e-10		-0.528838	5.89225e-16		1.32762	6.06857e-131	UP
LBU_0099	798	metallo-beta-lactamase		73.4943	91.7053	61.9438	223.933	0.319373	0.00596351		-0.566046	6.94727e-13		1.85404	1.91012e-207	UP
LBU_0100	1284	serine protease HtrA	K01362	4006.73	3572.68	1207.99	1167.08	-0.165418	1.91475e-36		-1.56439	0	DOWN	-0.0497101	0.00111046
LBU_0101	480	ribosomal RNA large subunit methyltransferase h	K00783	76.5688	119.79	81.0866	116.977	0.645679	2.46399e-06		-0.562973	2.5007e-10		0.528692	9.06238e-10
LBU_0102	318	hypothetical protein		95.9031	99.6985	23.2482	105.291	0.0559935	0.759125		-2.10045	1.76062e-41	DOWN	2.17919	3.47091e-49	UP
LBU_0103	342	hypothetical protein		84.6001	68.779	30.9416	324.782	-0.298692	0.110942		-1.15242	6.88676e-14	DOWN	3.39185	6.79019e-253	UP
LBU_0104	369	pyridoxine 5'-phosphate oxidase v related favin-nucleotide-binding protein		6813.18	2898.15	3999.54	9573.42	-1.2332	0	DOWN	0.464702	7.58836e-162		1.2592	0	UP
LBU_0105	228	conserved hypothetical protein		58.3055	38.3767	57.8566	44.1384	-0.603402	0.0364582		0.592251	0.00163072		-0.390445	0.0271261
LBU_0106	1368	transposase		31.4392	30.07	39.7896	30.5256	-0.0642394	0.679353		0.404066	5.97359e-06		-0.38237	8.3686e-06
LBU_0107	669	ABC-type transport system permease protein		15.1954	28.3662	32.0687	25.8678	0.900539	0.000327298		0.176992	0.202757		-0.310009	0.0232066
LBU_0108	1356	ABC-type transport system ATP-binding protein	K16786	31.7175	55.3928	27.4738	19.282	0.804421	5.42694e-11		-1.01164	1.46045e-33	DOWN	-0.510801	1.43372e-06
LBU_0109	1476	major facilitator superfamily permease		12.1853	15.2437	13.1112	5.98976	0.323069	0.130175		-0.217418	0.110189		-1.13022	4.08814e-12	DOWN
LBU_0110	849	AraC family transcriptional regulator		68.1584	67.0566	33.8068	47.5245	-0.0235122	0.862686		-0.988067	7.00454e-25		0.49136	1.28501e-06
LBU_0111	933	ABC-type multidrug transport system ATP-binding protein	K01990	18.439	23.6282	11.7304	28.4273	0.357756	0.0984855		-1.01027	7.67401e-11	DOWN	1.27703	3.1881e-19	UP
LBU_0112	747	ABC transporter permease		41.8731	24.0352	9.79979	11.0798	-0.800873	2.81853e-05		-1.29433	7.59523e-13	DOWN	0.177103	0.419155
LBU_0113	765	ABC transporter permease		16.3551	33.5706	13.359	18.1957	1.03745	2.28258e-06	UP	-1.32938	1.85565e-18	DOWN	0.445785	0.0100397
LBU_0114	1224	YcaO-like family		22.9994	23.4882	25.4034	16.8279	0.030343	0.875016		0.113083	0.323765		-0.594164	4.3789e-07
LBU_0115	477	transcriptional regulator		19.6724	39.3076	54.3977	14.9852	0.998634	9.58699e-05		0.468736	0.000349142		-1.86001	1.41731e-31	DOWN
LBU_0116	246	transcriptional regulator		82.6482	148.742	149.673	79.5236	0.847752	1.89728e-06		0.00901055	0.933044		-0.912362	9.92508e-16
LBU_0117	900	putative protease HtpX-like protein	K03799	450.941	626.38	316.817	294.905	0.474099	1.30433e-29		-0.983391	2.41593e-230		-0.103396	0.00407091
LBU_0118	555	LemA protein	K03744	1062.36	1451.05	849.383	1011.36	0.449813	5.26207e-38		-0.772605	1.2067e-218		0.251803	2.52849e-22
LBU_0119	1146	cation transport protein		67.5532	294.399	93.161	45.5487	2.12368	8.84757e-193	UP	-1.65998	0	DOWN	-1.03232	2.83945e-52	DOWN
LBU_0120	912	restriction endonuclease		39.4419	70.7726	46.9687	64.5576	0.84346	2.45606e-10		-0.59149	2.30668e-12		0.458887	3.73388e-08
LBU_0121	1146	cell wall-associated hydrolase		1295.11	539.716	2936.69	7087.3	-1.2628	0	DOWN	2.44392	0	UP	1.27105	0	UP
LBU_0122	204	putative membrane protein		15.3329	0	13.5011	20.2857	0	0		5.59917	8.97346e-09	UP	0.587387	0.0732245
LBU_0123	177	putative membrane protein		0	1.28401	14.7416	20.7233	0	0		3.52117	4.68765e-07	UP	0.49136	0.152975
LBU_0124	762	ABC-type amino acid transport system ATP-binding protein	K17076	100.57	52.4927	204.693	23.2044	-0.938004	3.85566e-14		1.96327	3.34712e-181	UP	-3.14099	0	DOWN
LBU_0125	1584	ABC-type amino acid transport system substrate-binding and permease protein	K17074	147.115	106.317	245.305	43.7603	-0.468564	9.2079e-13		1.2062	3.78486e-221	UP	-2.48688	0	DOWN
LBU_0126	627	DNA-3-methyladenine glycosylase	K03652	29.9322	37.8783	10.4038	30.9007	0.339671	0.10261		-1.86426	4.00337e-27	DOWN	1.57053	3.45529e-19	UP
LBU_0127	372	hypothetical protein		119.819	149.375	81.2473	130.712	0.318075	0.0174035		-0.878544	3.08404e-20		0.686	5.696e-13
LBU_0128	699	NAD-dependent deacetylase	K12410	55.9356	97.5406	49.8751	69.9672	0.802237	4.58853e-10		-0.967683	1.53526e-28		0.488357	1.11156e-07
LBU_0129	480	hypothetical protein		154.767	200.518	207.775	546.089	0.373637	0.000232272		0.0512893	0.41937		1.39412	7.82075e-202	UP
LBU_0130	1464	putative cardiolipin synthetase	K06131	78.5184	78.5509	62.0335	96.8787	0.000595615	0.996085		-0.34058	1.90868e-08		0.643133	1.81353e-31
LBU_0131	945	alpha/beta hydrolase		39.7196	53.2701	50.3139	64.5923	0.423475	0.00292178		-0.0823681	0.358398		0.360405	8.03535e-06
LBU_0132	768	ribonuclease HI	K03469	63.1285	116.89	70.7809	153.202	0.888787	4.91432e-15		-0.723719	3.54803e-23		1.114	7.99681e-65	UP
LBU_0133	957	conserved hypothetical protein		693.731	800.55	251.445	290.608	0.206615	2.51306e-09		-1.67075	0	DOWN	0.208834	1.2939e-08
LBU_0134	825	putative glycosyltransferase		272.034	434.429	262.42	383.96	0.675334	2.41801e-35		-0.727243	1.40946e-88		0.549078	6.73951e-52
LBU_0135	660	alpha/beta superfamily hydrolase		150.472	377.233	209.642	356.97	1.32596	5.57529e-74	UP	-0.84753	2.60685e-80		0.767876	1.98339e-69
LBU_0136	1002	phosphoribosyl pyrophosphate synthetase	K00948	703.157	708.12	694.56	1425.24	0.0101459	0.79254		-0.0278929	0.236807		1.03703	0	UP
LBU_0137	681	putative TetR-type transcriptional regulator		933.553	1116.99	829.525	2244.54	0.258816	1.3842e-13		-0.429262	5.97005e-73		1.43606	0	UP
LBU_0138	834	hypothetical protein		343.171	364.885	230.822	601.64	0.0885148	0.112023		-0.660658	5.55984e-64		1.38212	0	UP
LBU_0139	651	transcription regulatory protein	K01420	2301.49	2265.19	178.694	116.59	-0.0229382	0.365114		-3.66407	0	DOWN	-0.61605	2.91671e-24
LBU_0140	1326	serine protease		3531.29	5811.49	332.827	314.925	0.718711	0		-4.12606	0	DOWN	-0.0797629	0.00567441
LBU_0141	1089	D-alanine-D-alanine ligase A	K01921	2026.4	3845.84	1465.9	1251.61	0.924384	0		-1.39151	0	DOWN	-0.228003	1.64254e-50
LBU_0142	636	transcriptional regulator		1447.15	2117.25	772.432	803.583	0.548975	1.41043e-89		-1.45471	0	DOWN	0.0570377	0.033259
LBU_0143	1110	putative membrane protein		97.2191	102.476	66.0805	100.153	0.0759762	0.415597		-0.63299	3.50011e-23		0.599903	3.0677e-22
LBU_0144	795	putative membrane protein		253.774	259.288	144.23	137.825	0.0310059	0.661296		-0.846182	1.35711e-66		-0.0655369	0.253773
LBU_0145	867	lipase/esterase		159.643	163.964	86.7749	89.6043	0.0385349	0.650915		-0.918033	4.6121e-53		0.04629	0.509194
LBU_0146	522	oligo-1,6-glucosidase	K01215	26.9648	40.7083	13.0519	16.5762	0.594244	0.0086462		-1.64106	1.07567e-20	DOWN	0.344856	0.113474
LBU_0147	573	ABC-type sugar transport system permease protein	K15771	24.5648	25.5827	8.47493	2.29795	0.0585766	0.831504		-1.5939	3.56169e-14	DOWN	-1.88285	4.18656e-07	DOWN
LBU_0148	489	ABC-type sugar transport system permease protein	K15772	6.39656	9.99243	5.1877	7.69342	0.643539	0.186905		-0.945739	0.0040247		0.568528	0.0972997		RPKM<10	pseudogene
LBU_0149	3006	conserved hypothetical protein	K05546	79.3426	131.894	67.6814	62.2633	0.733207	8.50253e-45		-0.962542	7.03946e-157		-0.120378	0.00487599
LBU_0150	807	N-acetylglucosamine-6-phosphate deacetylase	K01443	338.179	399.904	172.981	314.789	0.241866	7.47294e-06		-1.20904	1.18238e-184	DOWN	0.863769	4.03804e-91
LBU_0151	345	N-acetylglucosamine-6-phosphate deacetylase		491.854	597.159	195.59	428.277	0.279886	3.95415e-05		-1.61028	5.78414e-182	DOWN	1.13071	6.32274e-83	UP
LBU_0152	474	Nucleoside deoxyribosyltransferase		366.244	273.299	481.516	950.441	-0.422323	2.40146e-08		0.817103	2.20891e-69		0.981015	2.88973e-198
LBU_0153	480	putative PTS system IIA component	K02773	79.8271	111.741	41.6758	95.6195	0.485208	0.000473387		-1.42288	9.33029e-41	DOWN	1.1981	2.89478e-29	UP
LBU_0154	798	putative protein tyrosine/serine phosphatase	K01104	65.6549	147.099	62.3979	83.2089	1.16381	2.92878e-29	UP	-1.23722	1.09341e-70	DOWN	0.415241	1.00533e-07
LBU_0155	474	putative universal stress protein		3697.08	2730.11	311.479	485.538	-0.437426	3.74777e-77		-3.13175	0	DOWN	0.640451	9.18253e-50
LBU_0156	942	conserved hypothetical protein	K02044	2936.99	1907.67	3422.93	5519.22	-0.622529	8.81355e-229		0.843424	0		0.68923	0
LBU_0157	771	ABC-type phosphonate transport system ATP-binding protein	K02041	538.562	554.172	872.388	549.186	0.0412233	0.387832		0.654635	3.21033e-137		-0.667676	2.98223e-153
LBU_0158	801	ABC-type phosphonate transport system permease protein	K02042	260.66	192.938	322.132	172.84	-0.434031	3.18732e-10		0.739513	4.42782e-66		-0.898217	9.4254e-99
LBU_0159	813	ABC-type phosphonate transport system permease protein	K02042	99.07	64.5748	149.773	64.4366	-0.617477	7.9195e-08		1.21374	3.90436e-71	UP	-1.21683	6.1229e-77	DOWN
LBU_0160	1626	ABC-type oligopeptide transport system substrate-binding protein	K15580	335.684	89.0349	541.413	335.371	-1.91466	4.9009e-272	DOWN	2.60429	0	UP	-0.690971	1.69895e-212
LBU_0161	486	hypothetical protein		408.689	413.855	244.88	621.788	0.0181233	0.803935		-0.757052	5.84592e-54		1.34435	5.39525e-220	UP
LBU_0162	1401	Ser/Thr phosphatase		624.021	744.182	427.066	1191.19	0.254062	1.48006e-17		-0.801197	8.71734e-301		1.47987	0	UP
LBU_0163	1950	asparagine synthase	K01953	431.492	538.221	520.924	760.857	0.318864	1.77103e-26		-0.0471256	0.0143065		0.546551	1.61613e-235
LBU_0164	1260	putative ATP-grasp enzyme	K17810	634.893	578.816	663.994	788.768	-0.133408	7.55756e-05		0.198065	1.15144e-19		0.24843	1.87636e-37
LBU_0165	2211	putative anaerobic ribonucleoside-triphosphate reductase	K00527	1083.31	1303.85	1485.32	3792.49	0.267324	8.04573e-51		0.188006	5.32837e-66		1.35237	0	UP
LBU_0166	723	anaerobic ribonucleoside-triphosphate reductase activating protein	K04068	216.315	286.68	262.25	325.344	0.406308	3.92772e-09		-0.1285	0.00335187		0.311025	1.65374e-14
LBU_0167	225	metal-sulfur cluster biosynthesis protein		72.9847	233.835	282.51	328.137	1.67983	3.83531e-23	UP	0.272807	0.000752877		0.215999	0.00273155
LBU_0168	204	PAS sensor protein		42.1656	124.218	100.548	156.292	1.55874	9.35092e-11	UP	-0.304999	0.018537		0.636366	5.18016e-08
LBU_0169	237	PAS sensor protein	K09155	98.9847	111.237	162.391	145.642	0.168365	0.391736		0.54583	5.07822e-07		-0.157049	0.116324
LBU_0170	1221	conserved hypothetical protein		285.637	324.432	153.448	181.171	0.183731	0.000145683		-1.08017	3.88814e-189	DOWN	0.239607	7.0793e-09
LBU_0171	339	glutaredoxin-related protein		1164.9	1259.7	1346.11	1831.93	0.112884	0.0152815		0.0957132	0.00109316		0.444569	1.16376e-68
LBU_0172	1953	endopeptidase O	K07386	905.703	1180.34	1050.82	1236.06	0.382088	6.04219e-79		-0.167675	8.79196e-38		0.234231	1.45372e-79
LBU_0173	2031	putative potassium transport system protein kup 1	K03549	324.958	293.067	817.189	691.66	-0.149024	6.16351e-05		1.47944	0	UP	-0.240608	5.45995e-58
LBU_0174	417	hypothetical protein		1027.64	977.478	1504	2262.89	-0.0721957	0.123063		0.621665	5.86092e-117		0.589363	5.706e-172
LBU_0175	948	lipoprotein		56.0914	80.4314	238.388	391.09	0.519981	8.19387e-06		1.56748	7.35191e-192	UP	0.71419	1.12255e-95
LBU_0176	321	hypothetical protein		4.87215	10.6201	16.7087	31.9367	1.12416	0.0727847		0.653806	0.0288679		0.934614	1.76975e-05
LBU_0177	237	hypothetical protein		6.59898	0.479472	7.33971	11.9053	-3.78273	0.00906044		3.93621	1.93332e-05	UP	0.697811	0.0846951
LBU_0178	1203	N-acetylmuramidase	K02395	372.464	198.459	791.131	783.61	-0.908256	3.05896e-72		1.99507	0	UP	-0.0137797	0.48869
LBU_0179	639	putative amidase	K13714	168.878	59.2181	409.584	314.39	-1.51187	9.93861e-40	DOWN	2.79005	0	UP	-0.381604	8.21151e-23
LBU_0180	951	N-acetylmuramoyl-L-alanine amidase		308.352	160.236	733.18	648.178	-0.944379	6.79514e-51		2.19397	0	UP	-0.177778	1.06386e-14
LBU_0181	1839	Na+-H+ antiporter	K03455	52.7273	55.6743	68.026	51.9102	0.0784614	0.425692		0.289076	5.30745e-07		-0.39007	4.59124e-12
LBU_0182	408	Oxidoreductase		80.4979	24.231	13.5011	16.3669	-1.7321	1.52054e-15	DOWN	-0.843773	0.000195721		0.277702	0.260973
LBU_0183	219	oxidoreductase		78.555	51.3692	24.8218	14.6017	-0.612801	0.0153831		-1.0493	1.73548e-06	DOWN	-0.765473	0.00895358
LBU_0184	750	hypothetical protein		176.206	171.21	67.4544	45.2704	-0.041498	0.638018		-1.34378	1.65067e-87	DOWN	-0.575345	3.43821e-10
LBU_0185	690	phosphoglycerate mutase	K01834	4083.29	2646.54	5054.77	7311.11	-0.625626	5.0949e-235		0.933539	0		0.532445	0
LBU_0186	1296	LytR family transcriptional regulator		196.702	309.69	381.804	271.198	0.654816	2.15153e-37		0.302009	1.36571e-25		-0.493488	2.551e-66
LBU_0187	618	membrane protein	K08591	79.7164	74.1017	72.5969	32.8725	-0.10537	0.461652		-0.0295977	0.755388		-1.14303	1.11359e-26	DOWN
LBU_0188	3033	conserved hypothetical protein		227.143	224.572	496.365	138.644	-0.0164205	0.670357		1.14422	0	UP	-1.84002	0	DOWN
LBU_0189	309	putative membrane protein		177.147	86.4213	166.539	127.229	-1.03549	4.19627e-12	DOWN	0.946401	3.60953e-21		-0.388433	1.10589e-05
LBU_0190	369	conserved hypothetical protein		103.84	177.997	155.762	74.426	0.77749	2.73272e-09		-0.192506	0.014696		-1.06547	2.72571e-30	DOWN
LBU_0191	585	conserved hypothetical protein		33.4179	68.7636	50.5499	17.3634	1.04102	2.6274e-09	UP	-0.443937	2.19435e-05		-1.54166	8.55163e-28	DOWN
LBU_0192	384	dihydroneopterin aldolase	K01633	181.24	215.137	338.238	193.247	0.247353	0.0226016		0.652786	1.19612e-27		-0.807591	2.25902e-42
LBU_0193	1074	GTP cyclohydrolase I/2-amino-4-hydroxy-6-hydroxymethyldihydropteridine pyrophosphokinase	K01495	173.288	143.26	267.041	120.937	-0.274531	0.00012839		0.898422	1.10497e-101		-1.14281	3.1062e-162	DOWN
LBU_0194	1338	folylpolyglutamate synthase	K11754	159.552	94.8655	195.5	77.252	-0.750069	1.08967e-25		1.04321	1.23562e-118	UP	-1.33953	1.34346e-189	DOWN
LBU_0195	1092	dihydropteroate synthase	K00796	162.554	154.219	229.718	91.4682	-0.0759444	0.304421		0.574886	1.02807e-41		-1.32852	1.30023e-179	DOWN
LBU_0196	225	transcriptional regulator		31.2792	23.232	32.5353	15.0483	-0.429089	0.27587		0.485892	0.05119		-1.1124	2.86125e-05	DOWN
LBU_0197	660	ABC-type amino acid transport system permease protein	K02029	46.2079	56.8174	46.2332	8.69268	0.298194	0.068443		-0.297403	0.00506545		-2.41106	1.37634e-50	DOWN
LBU_0198	675	ABC-type amino acid transport system permease protein	K02029	112.373	135.688	104.049	36.5061	0.271998	0.00831196		-0.38304	2.15181e-08		-1.51105	4.16696e-62	DOWN
LBU_0199	741	ABC-type amino acid transport system ATP-binding protein	K02028	74.9265	59.3477	81.9675	17.135	-0.336283	0.0120886		0.465859	4.61735e-08		-2.25811	8.33838e-92	DOWN
LBU_0200	861	ABC-type amino acid transport system substrate-binding protein	K02030	153.49	139.635	139.403	58.6596	-0.136481	0.109374		-0.00239422	0.967684		-1.24883	5.89041e-79	DOWN
LBU_0201	204	membrane protein		7.66647	5.0133	9.2376	2.76624	-0.612801	0.485701		0.881757	0.094603		-1.73959	0.00307297		RPKM<10	pseudogene
LBU_0202	177	membrane protein		4.41796	1.92601	9.41826	2.12547	-1.19776	0.379671		2.28984	0.00124965		-2.14768	0.00133795		RPKM<10	pseudogene
LBU_0203	195	membrane protein		8.0203	0.582743	5.57536	0.482318	-3.78273	0.00906044		3.25813	0.00172148		-3.53101	0.000800726	DOWN	RPKM<10	pseudogene
LBU_0204	1266	tyrosyl-tRNA synthetase	K01866	393.46	367.024	498.827	287.654	-0.100343	0.0197136		0.442664	2.68522e-64		-0.794208	2.1076e-194
LBU_0205	366	Putative Pyridoxamine 5'-Phosphate Oxidase		1828.89	952.545	721.034	2625.49	-0.94111	9.30456e-114		-0.401721	1.68417e-30		1.86445	0	UP
LBU_0206	462	amino acid permease		104.941	36.8944	138.841	286.838	-1.5081	1.57522e-18	DOWN	1.91196	5.89764e-73	UP	1.0468	5.83249e-66	UP
LBU_0207	1188	aminoacylase		160.609	106.557	187.788	382.462	-0.591929	1.19569e-15		0.817487	6.60638e-68		1.02621	2.82338e-215	UP
LBU_0208	564	conserved hypothetical protein		13.8649	2.21628	18.3769	11.3396	-2.64522	4.72633e-07	DOWN	3.05168	2.34588e-21	UP	-0.696526	0.000847557
LBU_0209	1083	amino acid transport protein	K03293	5.77639	9.86304	7.36174	1.73688	0.771863	0.0194068		-0.421986	0.0383681		-2.08355	3.51458e-12	DOWN	RPKM<10	pseudogene
LBU_0210	1248	Excinuclease ABC C subunit domain protein	K09384	35.0888	20.0318	39.2017	18.0116	-0.808721	5.46237e-07		0.968627	6.15127e-21		-1.12199	3.7934e-28	DOWN
LBU_0211	651	HD superfamily hydrolase	K06950	210.21	163.208	328.886	338.356	-0.365114	1.63542e-05		1.01087	1.39384e-92	UP	0.040954	0.321896
LBU_0212	207	hypothetical protein		230.438	191.587	442.231	462.536	-0.26638	0.0648401		1.2068	2.07352e-53	UP	0.0647657	0.303436
LBU_0213	1326	ABC-type oligopeptide transport system substrate-binding protein		199.918	117.234	344.47	258.82	-0.770015	5.52828e-33		1.55498	0	UP	-0.412426	1.6959e-44
LBU_0214	1449	ABC-type oligopeptide transport system substrate-binding protein	K15580	932.547	551.941	3137.23	1450.11	-0.756663	8.53061e-158		2.50691	0	UP	-1.11333	0	DOWN
LBU_0215	222	conserved hypothetical protein		38.7467	16.8917	143.327	210.134	-1.19776	0.0023436		3.08493	5.65261e-63	UP	0.552002	6.58091e-09
LBU_0216	678	ABC-type oligopeptide transport system substrate-binding protein		73.8152	46.0908	90.7599	147.32	-0.679438	4.3278e-06		0.977576	2.51525e-26		0.69883	6.11428e-26
LBU_0217	654	ABC-type oligopeptide transport system substrate-binding protein		65.7628	58.3812	109.606	219.886	-0.171768	0.258998		0.908752	4.30073e-27		1.00443	7.42894e-67	UP
LBU_0218	1650	ABC-type oligopeptide transport system substrate-binding protein	K02035	230.802	206.953	211.597	294.126	-0.157354	0.00142599		0.0320127	0.342752		0.475119	8.21898e-61
LBU_0219	921	ABC-type oligopeptide transport system permease protein	K15581	2122.64	1797.18	4826.39	4464.56	-0.240121	1.20345e-28		1.42521	0	UP	-0.112426	3.86621e-36
LBU_0220	1032	ABC-type oligopeptide transport system permease protein	K15582	957.016	606.823	2206.91	1819.89	-0.657266	1.16655e-90		1.86268	0	UP	-0.278176	9.20939e-104
LBU_0221	1044	ABC-type oligopeptide transport system ATP-binding protein	K15583	1286.82	759.742	2404.53	2006.35	-0.760229	3.66618e-158		1.66217	0	UP	-0.261182	1.79661e-101
LBU_0222	954	ABC-type oligopeptide transport system ATP-binding protein	K10823	910.67	618.917	2064.61	1687.71	-0.557183	8.23586e-60		1.73805	0	UP	-0.290799	1.07298e-97
LBU_0223	1314	cysteine aminopeptidase		522.51	414.413	825.738	977.167	-0.334391	2.49499e-19		0.994617	0		0.242921	5.261e-46
LBU_0224	1314	cysteine aminopeptidase		57.726	99.0197	123.337	112.018	0.778493	3.61952e-17		0.316815	4.43787e-10		-0.138875	0.00384115
LBU_0225	426	small heat shock protein	K13993	86529.9	71607	3613.43	4858.69	-0.273098	0		-4.30866	0	DOWN	0.427197	1.66785e-209
LBU_0226	462	transcriptional elongation factor	K04760	1200.05	854.967	212.889	568.18	-0.489155	8.84228e-31		-2.00576	0	DOWN	1.41624	5.86942e-207	UP
LBU_0227	1290	adenylosuccinate synthetase	K01939	447.365	156.71	696.872	1228.14	-1.51335	7.94623e-207	DOWN	2.15279	0	UP	0.817514	0
LBU_0228	993	GMP reductase	K00364	97.649	54.0137	137.295	133.359	-0.854279	3.59902e-15		1.34588	4.96639e-93	UP	-0.0419698	0.426082
LBU_0229	1308	Nucleotidyltransferase/DNA polymerase	K03502	317.455	550.278	56.1883	88.2996	0.793607	7.85491e-92		-3.29182	0	DOWN	0.652136	1.63032e-26
LBU_0230	360	hypothetical protein		234.594	480.423	35.4345	58.7825	1.03414	2.59549e-35	UP	-3.76108	0	DOWN	0.730232	5.67414e-07
LBU_0231	1293	Xanthine/uracil permease	K16169	429.998	757.741	331.063	222.073	0.817375	6.22976e-131		-1.1946	0	DOWN	-0.576071	9.63894e-76
LBU_0232	570	Xanthine phosphoribosyltransferase	K03816	544.642	597.48	612.771	498.806	0.133583	0.0105061		0.0364575	0.279125		-0.29687	3.20147e-19
LBU_0233	1158	inosine-5-monophosphate dehydrogenase	K00088	2764.61	1985.67	4352.53	2629.56	-0.477456	3.37329e-164		1.13223	0	UP	-0.727036	0
LBU_0234	1554	GMP synthase	K01951	2531.62	2111.68	3673.65	2242.06	-0.261672	3.32128e-66		0.798827	0		-0.712393	0
LBU_0235	1701	ABC-type multidrug transport system ATP-binding and permease protein		105.735	98.6038	182.2	112.133	-0.100739	0.16769		0.885812	3.40413e-107		-0.700321	1.40985e-77
LBU_0236	795	AraC family transcriptional regulator		54.0992	28.4444	16.0458	16.326	-0.927461	2.30065e-08		-0.82595	2.76945e-08		0.0249756	0.884468
LBU_0237	1392	6-phospho-beta-glucosidase	K01223	10.6736	1.06124	10.8303	13.243	-3.33021	5.41586e-15	DOWN	3.35124	6.87402e-33	UP	0.290153	0.0486614
LBU_0238	174	hypothetical protein		4.49413	7.83688	4.1655	0	0.802237	0.406571		-0.911792	0.144653		-3.94605	0.00452949		RPKM<10
LBU_0239	216	hypothetical protein		3.62028	1.05217	2.34888	0	-1.78273	0.231454		1.1586	0.280477		-3.43147	0.0244998		RPKM<10
LBU_0240	813	ABC-type amino acid transport system substrate-binding protein	K02424	105.803	67.2304	160.204	138.012	-0.654192	4.95584e-09		1.25272	9.13091e-80	UP	-0.215114	6.77655e-05
LBU_0241	750	ABC-type amino acid transport system ATP-binding protein	K10010	39.6203	45.4539	101.278	98.3157	0.198166	0.24841		1.15585	9.682e-42	UP	-0.0428304	0.544826
LBU_0242	744	ABC-type amino acid transport system permease protein	K10009	55.7055	28.4087	83.0983	102.901	-0.971487	1.17093e-08		1.54849	8.92088e-53	UP	0.308366	1.60329e-05
LBU_0243	696	Pnp/Udp family phosphorylase		43.8178	40.9804	63.8362	11.8916	-0.0965843	0.601666		0.639442	4.56626e-10		-2.42443	2.10499e-73	DOWN
LBU_0244	1263	putative ATP-grasp enzyme	K17810	108.35	90.8719	74.9473	44.0101	-0.253797	0.00244793		-0.277958	3.77582e-06		-0.768042	8.16657e-29
LBU_0245	966	putative transcriptional regulator		14.571	17.057	30.2374	22.5881	0.227258	0.364222		0.82597	2.59222e-10		-0.420772	0.000380879
LBU_0246	954	amino acid permease		30.3283	32.6373	19.9813	33.0266	0.105853	0.562947		-0.70787	1.17484e-08		0.724981	1.19718e-09
LBU_0247	918	homocysteine S-methyltransferase	K00547	4.25915	13.3688	19.5016	28.9942	1.65023	2.965e-06	UP	0.544722	0.000660369		0.572174	6.43846e-06
LBU_0248	450	YbaK/prolyl-tRNA synthetase domain protein		22.5905	16.1614	49.4472	64.5824	-0.483165	0.139301		1.61334	4.09543e-21	UP	0.385251	0.00110913
LBU_0249	195	chorismate mutase		8.0203	0	5.94705	1.44695	0	0		4.35124	0.000342541	UP	-2.03915	0.00992005		RPKM<10	pseudogene
LBU_0250	450	MarR family transcriptional regulator		93.8375	123.483	60.8829	105.338	0.396078	0.0033156		-1.02021	1.46713e-25	DOWN	0.79092	7.34849e-16
LBU_0251	1023	L-asparaginase	K01424	41.2775	39.5445	25.0101	30.5232	-0.0618797	0.693804		-0.660966	9.08874e-10		0.287398	0.0106141
LBU_0252	285	phosphatase yida		5.48758	5.98078	1.01726	7.92017	0.124165	0.876812		-2.55565	0.000501319	DOWN	2.96085	6.98549e-06	UP	RPKM<10	pseudogene
LBU_0253	510	putative hydrolase		58.2651	36.5414	9.94819	34.8546	-0.673101	0.00047646		-1.87703	8.55956e-22	DOWN	1.80884	2.51067e-21	UP
LBU_0254	477	large conductance mechanosensitive channel	K03282	222.954	178.433	304.658	226.553	-0.321367	0.000809537		0.771807	1.01392e-40		-0.427341	4.41197e-16
LBU_0255	1524	putative nicotinate phosphoribosyltransferase	K00763	176.51	92.2351	321.07	115.035	-0.936361	3.71071e-46		1.7995	0	UP	-1.48082	0	DOWN
LBU_0256	696	conserved hypothetical protein	K07482	303.354	123.104	321.993	204.185	-1.30112	3.5494e-61	DOWN	1.38715	6.41228e-159	UP	-0.657154	1.07901e-50
LBU_0257	306	conserved hypothetical protein		247.882	304.512	378.742	294.758	0.296842	0.00373922		0.314717	1.66118e-07		-0.361684	5.74257e-10
LBU_0258	555	pyrazinamidase/nicotinamidase		97.2191	50.5726	351.82	152.686	-0.942883	2.02617e-10		2.79841	0	UP	-1.20427	1.82024e-120	DOWN
LBU_0259	873	hypothetical protein		913.653	931.858	132.589	203.725	0.0284633	0.41063		-2.81315	0	DOWN	0.619668	1.14273e-36
LBU_0260	267	hypothetical protein		374.882	342.607	58.3638	70.8032	-0.129881	0.187499		-2.55341	7.74068e-147	DOWN	0.278742	0.054781
LBU_0261	558	NUDIX family hydrolase		105.105	81.255	76.1166	60.1731	-0.371299	0.0045424		-0.0942453	0.319243		-0.339094	0.000462074
LBU_0262	1299	transposase	K07496	137.855	238.817	63.8312	51.2616	0.792756	2.80352e-40		-1.90357	0	DOWN	-0.316383	4.15134e-06
LBU_0263	327	hypothetical protein		196.093	107.032	28.1496	28.1868	-0.873491	7.95547e-11		-1.92686	6.00967e-41	DOWN	0.0019079	0.992086
LBU_0264	183	hypothetical protein		192.29	72.0308	71.2915	61.1595	-1.4166	1.09238e-12	DOWN	-0.0148852	0.933422		-0.221153	0.20423
LBU_0265	801	ABC-type transport system permease protein	K01992	86.8866	106.4	102.793	61.2923	0.292288	0.00636733		-0.0497569	0.469932		-0.745958	4.4284e-24
LBU_0266	711	ABC-type transport system ATP-binding protein	K01990	45.093	52.5821	76.8631	21.2973	0.221666	0.17574		0.54772	1.80111e-09		-1.85162	2.005e-64	DOWN
LBU_0267	735	conserved hypothetical protein		76.6021	128.477	67.056	24.0568	0.746054	5.39393e-12		-0.938071	4.80929e-37		-1.47892	1.03441e-42	DOWN
LBU_0268	669	hypothetical protein		90.0036	70.3211	71.3962	57.2185	-0.356025	0.00572746		0.0218904	0.813011		-0.319367	0.000449458
LBU_0269	1026	tryptophanyl-tRNA synthetase	K01867	185.968	273.233	354.698	335.14	0.555079	4.38918e-20		0.37646	2.56106e-28		-0.0818259	0.0100476
LBU_0270	483	dCMP deaminase	K01493	192.662	185.862	292.32	207.382	-0.0518345	0.623335		0.653312	5.79807e-30		-0.495258	4.13044e-20
LBU_0271	2691	magnesium-translocating P-type ATPase	K01531	1241.69	1861.19	598.098	213.408	0.583914	0		-1.63777	0	DOWN	-1.48677	0	DOWN
LBU_0272	1983	methionyl-tRNA synthetase	K01874	353.724	415.515	619.677	451.004	0.232274	4.07773e-12		0.576617	4.03259e-199		-0.458377	4.44714e-142
LBU_0273	780	TatD family deoxyribonuclease	K03424	257.652	219.84	369.46	258.764	-0.228973	0.000857428		0.748968	3.17548e-75		-0.513785	3.80821e-42
LBU_0274	573	conserved hypothetical protein	K05985	173.318	106.694	179.365	146.248	-0.699948	2.32321e-11		0.749422	7.18206e-28		-0.294477	1.65209e-06
LBU_0275	891	dimethyladenosine transferase	K02528	50.0256	54.0754	112.665	67.8737	0.112305	0.436578		1.05899	1.18925e-47	UP	-0.731113	4.37035e-28
LBU_0276	252	veg-like protein		2727.62	2472.01	2774.36	955.822	-0.141958	9.78228e-05		0.166471	2.63296e-12		-1.53734	0	DOWN
LBU_0277	831	Pur operon transcriptional repressor	K09685	169.382	268.156	306.926	104.804	0.662795	8.46231e-22		0.194819	9.36817e-07		-1.5502	8.15755e-230	DOWN
LBU_0278	1386	UDP-N-acetylglucosamine pyrophosphorylase	K04042	358.83	270.641	449.468	391.001	-0.406921	3.72198e-20		0.731837	2.04425e-154		-0.201045	1.78959e-16
LBU_0279	756	hypothetical protein		1461.56	2251.65	1903.74	2197.78	0.623479	1.58388e-141		-0.242147	7.1887e-56		0.20721	6.11496e-44
LBU_0280	981	ribose-phosphate pyrophosphokinase	K00948	418.491	351.793	826.829	1088.93	-0.250468	1.62041e-07		1.23286	0	UP	0.397253	2.9162e-95
LBU_0281	1314	HD superfamily phosphohydrolase	K06885	73.7941	57.3363	139.168	191.898	-0.364057	0.000314637		1.2793	5.77985e-115	UP	0.463514	5.89834e-31
LBU_0282	399	hypothetical protein		201.864	229.833	177.112	498.311	0.187199	0.0682505		-0.375924	3.69804e-08		1.49238	8.12432e-170	UP
LBU_0283	570	DNA-directed RNA polymerase delta subunit	K03048	3254.13	5370.14	3579.86	4471.43	0.722688	0		-0.585058	0		0.320834	1.68646e-151
LBU_0284	1620	CTP synthase	K01937	497.667	580.309	589.009	432.349	0.221641	1.40616e-12		0.0214678	0.290666		-0.446094	2.56255e-105
LBU_0285	1272	UDP-N-acetylglucosamine 1-carboxyvinyltransferase	K00790	431.564	650.542	680.465	440.832	0.592066	1.83117e-63		0.0648806	0.00219501		-0.626293	8.22819e-176
LBU_0286	291	50S ribosomal protein L31	K02909	884.094	845.427	1107.37	260.178	-0.0645181	0.291851		0.389384	8.51623e-27		-2.08956	0	DOWN
LBU_0287	1368	UDP-N-acetylmuramoylalanyl-D-glutamyl-2,6-diaminopimelate--D-alanyl-D-alanyl ligase	K01929	669.941	1313.61	1004.81	622.82	0.971432	0		-0.38662	2.0022e-140		-0.690033	0
LBU_0288	1452	ATP-dependent RNA helicase DeaD	K05592	354.368	676.565	557.674	305.475	0.932981	5.73573e-164		-0.278808	1.43893e-42		-0.868369	1.14401e-289
LBU_0289	414	holo-(acyl-carrier-protein) synthase	K00997	326.769	452.618	408.617	445.27	0.470022	1.42502e-10		-0.147544	0.00139568		0.123932	0.00585386
LBU_0290	1131	putative alanine racemase	K01775	423.14	705.521	431.738	349.847	0.737553	1.0563e-89		-0.708533	1.48712e-186		-0.303432	2.41304e-27
LBU_0291	699	CBS domain-containing protein		186.825	82.0967	272.706	400.831	-1.18629	2.32118e-33	DOWN	1.73195	1.12669e-186	UP	0.555648	4.7552e-47
LBU_0292	558	peptidyl-tRNA hydrolase	K01056	196.196	385.299	203.67	233.95	0.973688	1.42893e-39		-0.919744	1.14975e-79		0.199965	0.000205149
LBU_0293	3492	transcription-repair coupling factor	K03723	46.1305	79.7592	78.4781	32.8589	0.789929	4.39846e-36		-0.0233599	0.539251		-1.256	7.58664e-180	DOWN
LBU_0294	243	putative ribosome-associated heat shock protein		57.9244	34.1372	80.5329	47.9936	-0.762826	0.00769786		1.23823	4.84137e-13	UP	-0.746737	9.41686e-07
LBU_0295	381	septation inhibitor protein		387.911	667.493	487.763	495.686	0.783026	1.37007e-32		-0.452571	7.04904e-28		0.0232457	0.605715
LBU_0296	354	putative ribosomal protein S1		245.197	269	203.721	190.761	0.133665	0.186222		-0.401011	2.48298e-09		-0.0948299	0.190557
LBU_0297	1296	putative cell cycle protein	K04075	89.3001	92.5913	142.499	218.802	0.0522151	0.571663		0.621998	1.31209e-35		0.618675	2.11241e-57
LBU_0298	2214	cell division protein FtsH	K03798	599.023	674.572	858.429	1407.13	0.171361	3.32189e-12		0.347726	5.24363e-122		0.712982	0
LBU_0299	882	heat shock protein HSP33	K04083	84.2268	97.7878	88.7506	311.374	0.215375	0.0421196		-0.139898	0.0405202		1.81082	0	UP
LBU_0300	1626	ABC-type oligopeptide transport system substrate-binding protein	K15580	10.0994	2.37613	13.5509	9.48618	-2.08758	1.891e-10	DOWN	2.51171	5.76643e-36	UP	-0.514493	0.000202454
LBU_0301	1287	peptidase T		5.46839	0.882943	12.6713	4.96934	-2.63072	1.92923e-06	DOWN	3.8431	3.86615e-39	UP	-1.35044	2.40123e-13	DOWN
LBU_0302	1035	tRNA-dihydrouridine synthase		352.08	567.515	629.277	215.456	0.688758	4.8436e-59		0.149037	1.39213e-09		-1.5463	0	DOWN
LBU_0303	405	hypothetical protein		30.893	50.2238	75.1641	58.7535	0.70109	0.00283697		0.581672	2.2634e-06		-0.355369	0.00198752
LBU_0304	531	GGDEF family protein		61.8515	140.171	98.96	59.336	1.18031	1.87598e-19	UP	-0.502271	8.5081e-11		-0.737937	1.29601e-15
LBU_0305	174	diguanylate cyclase		22.4707	101.88	78.7279	57.296	2.18075	9.82954e-12	UP	-0.371917	0.0176158		-0.458439	0.00877582
LBU_0306	162	O-acetylhomoserine sulfhydrylase		14.4811	104.516	85.4544	35.4146	2.85148	8.36903e-15	UP	-0.290497	0.066893		-1.27081	1.26777e-10	DOWN
LBU_0307	1173	O-acetylhomoserine (thiol)-lyase	K01740	26.666	86.2191	44.7977	34.0768	1.69301	1.04392e-43	UP	-0.944582	5.25271e-40		-0.394635	6.52021e-06
LBU_0308	609	diaphanous-like protein		841.045	552.874	130.797	303.468	-0.605234	2.45942e-41		-2.07962	0	DOWN	1.21422	1.42742e-115	UP
LBU_0309	462	conserved hypothetical protein	K07170	605.949	954.09	910.859	817.357	0.654928	5.94802e-41		-0.0668975	0.024809		-0.156262	1.31125e-07
LBU_0310	2460	endopeptidase Clp ATP-binding chain C	K03696	240.951	314.852	374.832	342.41	0.38593	6.9719e-28		0.251571	3.34645e-33		-0.130516	4.943e-11
LBU_0311	189	hypothetical protein		496.495	291.001	515.794	363.27	-0.770753	1.5142e-12		0.82577	4.49728e-31		-0.505755	7.96932e-15
LBU_0312	156	Lactococcin A immunity protein		100.254	30.594	89.2057	65.7158	-1.71234	5.71075e-08	DOWN	1.54389	5.62396e-13	UP	-0.440895	0.0108331
LBU_0313	3675	DNA-directed RNA polymerase beta subunit	K03043	834.324	736.168	1769.96	1289.55	-0.180573	4.2694e-26		1.26561	0	UP	-0.456853	0
LBU_0314	3666	DNA-directed RNA polymerase beta' subunit	K03046	1419.55	836.143	2476.45	1386.54	-0.763613	0		1.56645	0	UP	-0.836787	0
LBU_0315	561	Type II secretory pathway, prepilin signal peptidase PulO related peptidase		75.2707	56.311	23.6431	14.418	-0.418672	0.00713998		-1.252	1.65851e-20	DOWN	-0.713552	0.000110777
LBU_0316	408	30S ribosomal protein S12	K02950	4586.46	2658.44	9475.11	1540.1	-0.786801	2.80195e-233		1.83356	0	UP	-2.62112	0	DOWN
LBU_0317	471	30S ribosomal protein S7	K02992	3249.12	2535.67	8688.17	1461.3	-0.357679	7.3929e-47		1.77668	0	UP	-2.5718	0	DOWN
LBU_0318	2085	translation elongation factor G	K02355	2762.24	1540.53	5913.54	983.193	-0.842415	0		1.9406	0	UP	-2.58848	0	DOWN
LBU_0319	309	ribosomal protein S10	K02946	4307.21	4086.81	9807.5	1918.78	-0.0757802	0.00363527		1.26291	0	UP	-2.35369	0	DOWN
LBU_0320	630	ribosomal protein L3	K02906	6284.38	7826.55	15890.1	2699.89	0.316606	3.61064e-118		1.02168	0	UP	-2.55715	0	DOWN
LBU_0321	618	ribosomal protein L4	K02926	3167.14	2430.09	7432.45	1188.74	-0.38217	3.12267e-67		1.61283	0	UP	-2.64441	0	DOWN
LBU_0322	297	ribosomal protein L23	K02892	5073.65	2932.31	8754.17	1325.59	-0.790985	8.84386e-190		1.57793	0	UP	-2.72333	0	DOWN
LBU_0323	837	50S ribosomal protein L2	K02886	3232.56	2587.53	6939.08	1208.29	-0.321097	4.61675e-67		1.42317	0	UP	-2.52177	0	DOWN
LBU_0324	276	30S ribosomal protein S19	K02965	6556.16	3329.99	11599.9	2059.26	-0.977331	0		1.80052	0	UP	-2.49391	0	DOWN
LBU_0325	354	ribosomal protein L22	K02890	4281.01	2662.07	8109.12	1207	-0.6854	6.18447e-149		1.607	0	UP	-2.74812	0	DOWN
LBU_0326	672	ribosomal protein S3	K02982	2706.67	1840.82	6505.48	1051.79	-0.556175	2.2338e-123		1.82131	0	UP	-2.62881	0	DOWN
LBU_0327	444	ribosomal protein L16	K02878	6852.89	5316.78	14577.2	2892.95	-0.366159	5.59452e-96		1.45509	0	UP	-2.3331	0	DOWN
LBU_0328	210	ribosomal protein L29	K02904	5630.25	4831.1	19641.6	3493.36	-0.220847	2.15663e-15		2.02349	0	UP	-2.49123	0	DOWN
LBU_0329	267	ribosomal protein S17	K02961	6785.94	4043.61	15141.7	2192.43	-0.746904	1.6162e-206		1.90481	0	UP	-2.78793	0	DOWN
LBU_0330	369	ribosomal protein L14	K02874	9286.27	6324.75	21224.8	3219.69	-0.554091	5.41113e-230		1.74667	0	UP	-2.72075	0	DOWN
LBU_0331	276	50S ribosomal protein L24		9531.08	4405	18367.3	3331.69	-1.1135	0	DOWN	2.05993	0	UP	-2.46281	0	DOWN
LBU_0332	543	50S ribosomal protein L5	K02931	6003.82	3109.37	13348.1	1679.6	-0.949259	0		2.10195	0	UP	-2.99045	0	DOWN
LBU_0333	186	30S ribosomal protein S14	K02954	3851.04	2179.83	9239.6	1558.94	-0.82103	8.27386e-97		2.08361	0	UP	-2.56727	0	DOWN
LBU_0334	399	30S ribosomal protein S8	K02994	3884.42	2327.66	10113	1505.54	-0.738817	1.58303e-173		2.11926	0	UP	-2.74786	0	DOWN
LBU_0335	531	ribosomal protein L6	K02933	5569.58	2608.46	10421.4	1807.89	-1.09437	0	DOWN	1.99827	0	UP	-2.52717	0	DOWN
LBU_0336	360	50S ribosomal protein L18	K02881	4279.17	1753.13	7707.2	1244.36	-1.28739	0	DOWN	2.13627	0	UP	-2.6308	0	DOWN
LBU_0337	513	ribosomal protein S5	K02988	5423.55	2202.48	11139	1606.77	-1.30011	0	DOWN	2.33842	0	UP	-2.79338	0	DOWN
LBU_0338	186	50S ribosomal protein L30	K02907	2497.29	1571.95	6612.4	982.995	-0.667809	1.5102e-44		2.07262	0	UP	-2.74992	0	DOWN
LBU_0339	441	ribosomal protein L15	K02876	2597.73	1004.16	5052.87	898.719	-1.37126	0	DOWN	2.33111	0	UP	-2.49116	0	DOWN
LBU_0340	1296	putative preprotein translocase SecY subunit	K03076	2917.34	1089.79	6234.37	1031.38	-1.4206	0	DOWN	2.51619	0	UP	-2.59567	0	DOWN
LBU_0341	654	adenylate kinase	K00939	5465.49	2978.83	15671.9	2221.44	-0.875604	0		2.39536	0	UP	-2.81861	0	DOWN
LBU_0342	222	translation initiation factor IF-1	K02518	10285.5	12691.3	31986.4	8311.32	0.303225	8.93347e-63		1.33362	0	UP	-1.94431	0	DOWN
LBU_0343	351	ribosomal protein S13	K02952	8140.61	4081.14	10978.5	2362.29	-0.996164	0		1.42764	0	UP	-2.21643	0	DOWN
LBU_0344	390	30S ribosomal protein S11	K02948	5072.84	4405.53	12686.4	2533.38	-0.203477	1.9045e-21		1.52589	0	UP	-2.32414	0	DOWN
LBU_0345	939	DNA-directed RNA polymerase alpha subunit	K03040	4577.79	3329.42	8917.78	1977.2	-0.459381	3.05387e-205		1.42141	0	UP	-2.17323	0	DOWN
LBU_0346	384	50S ribosomal protein L17	K02879	2679.91	2444.04	5863.3	1207	-0.132918	7.41695e-06		1.26245	0	UP	-2.28029	0	DOWN
LBU_0347	849	ABC-type transport system ATP binding protein	K16786	255.133	380.121	345.239	402.352	0.575207	2.4255e-24		-0.138865	7.41346e-05		0.220864	2.66528e-11
LBU_0348	864	ABC-type transport system ATP-binding protein	K16787	238.938	272.513	242.102	267.134	0.189689	0.00267819		-0.17071	3.48961e-05		0.141947	0.000405999
LBU_0349	798	ABC-type transport system permease protein	K16785	221.463	330.225	278.929	268.956	0.576383	3.38887e-20		-0.243552	5.90596e-10		-0.052527	0.199475
LBU_0350	789	tRNA pseudouridine synthase A	K06173	322.108	351.706	344.485	309.096	0.126826	0.0288629		-0.0299299	0.430174		-0.156386	2.32227e-05
LBU_0351	444	ribosomal protein L13	K02871	7522.15	5340.84	10917	4345.46	-0.494079	2.95371e-182		1.03144	0	UP	-1.329	0	DOWN
LBU_0352	396	30S ribosomal protein S9	K02996	2606.6	2990.09	7174.2	2283.61	0.19802	9.80386e-13		1.26263	0	UP	-1.6515	0	DOWN
LBU_0353	228	bacterial extracellular solute-binding s, 5 Middle family protein		6.85947	11.4632	5.72208	1.65004	0.740836	0.277391		-1.00239	0.0276981		-1.79404	0.0120625
LBU_0354	747	ABC-type oligopeptide transport system substrate-binding protein		30.358	44.5716	14.9423	3.52538	0.55405	0.00195122		-1.57673	6.92516e-30	DOWN	-2.08355	1.69489e-16	DOWN
LBU_0355	423	ABC-type oligopeptide transport system substrate-binding protein		9.24326	11.2829	20.7329	6.22566	0.287664	0.550041		0.877789	0.000286837		-1.73563	1.1189e-10	DOWN
LBU_0356	624	ADP-ribose pyrophosphatase		101.507	149.51	42.1636	70.3883	0.558663	1.29128e-07		-1.82617	4.09192e-99	DOWN	0.739336	2.55547e-13
LBU_0357	231	major facilitator transporter		297.897	374.355	102.601	147.389	0.329595	0.00201906		-1.86736	8.91113e-95	DOWN	0.522582	2.562e-06
LBU_0358	453	transposase		730.193	1188.78	196.159	617.67	0.703127	3.44938e-56		-2.59938	0	DOWN	1.65481	9.91845e-277	UP
LBU_0359	411	conserved hypothetical protein		167.431	294.455	62.9568	102.061	0.81448	2.96024e-17		-2.22561	3.99275e-165	DOWN	0.697002	1.15615e-11
LBU_0360	486	major facilitator family transporter	K08156	209.171	351.192	65.4703	103.728	0.747576	1.07286e-20		-2.42335	7.9421e-257	DOWN	0.663895	1.0099e-12
LBU_0361	492	phospholipid-binding protein	K06910	421.188	537.456	109.898	159.621	0.351681	6.28854e-09		-2.28998	0	DOWN	0.538483	1.60831e-13
LBU_0362	204	hypothetical protein		49.832	99.709	45.8327	76.0715	1.00065	4.61473e-05	UP	-1.12135	9.87916e-12	DOWN	0.730978	1.88016e-05
LBU_0363	1275	aspartate/tyrosine/aromatic aminotransferase	K00841	40.4789	22.1031	60.087	53.1855	-0.872923	5.90426e-09		1.44281	1.03856e-58	UP	-0.176021	0.0124897
LBU_0364	1056	putative regulatory protein	K07035	15.5507	3.76631	32.2589	27.1646	-2.04576	3.22427e-10	DOWN	3.09848	1.44242e-67	UP	-0.247969	0.0206783
LBU_0365	393	ABC-type oligopeptide transport system substrate-binding protein		25.867	23.7101	16.2295	0.239318	-0.125613	0.697543		-0.546878	0.014093		-6.08355	8.73997e-20	DOWN
LBU_0366	156	bacterial extracellular solute-binding s, 5 Middle family protein		0	0	1.39384	0	0	0		0	0		0	0		RPKM<10	pseudogene
LBU_0367	1113	hypothetical protein		71.6639	127.929	117.999	84.9257	0.83602	6.3347e-21		-0.116561	0.0276141		-0.474505	1.70969e-17
LBU_0368	1068	hypothetical protein		284.09	231.313	147.538	104.267	-0.296502	1.22968e-07		-0.648757	1.22552e-50		-0.5008	1.05788e-22
LBU_0369	702	putative GntR family transcriptional regulator	K03710	504.611	762.422	227.66	244.106	0.595418	6.32258e-42		-1.74371	0	DOWN	0.100627	0.0308867
LBU_0370	1140	teichoic acid biosynthesis protein	K09809	54.8758	36.9812	61.9256	71.034	-0.569378	1.15613e-05		0.743745	2.23872e-19		0.197974	0.00393591
LBU_0371	1425	PST family polysaccharide transporter	K03328	95.4838	98.5633	107.575	104.018	0.0457939	0.592099		0.126222	0.0134191		-0.0485074	0.328585
LBU_0372	735	teichoic acid biosynthesis protein A	K05946	181.93	184.289	92.0048	103.777	0.0185904	0.836089		-1.00219	2.32805e-58	DOWN	0.173708	0.0138654
LBU_0373	1101	glycosyltransferase	K00743	188.215	174.735	132.912	122.242	-0.107208	0.113292		-0.394698	5.59481e-17		-0.120734	0.0168756
LBU_0374	702	conserved hypothetical protein		132.558	198.78	125.136	88.8269	0.584551	1.46336e-11		-0.667678	9.81587e-31		-0.494426	5.27009e-13
LBU_0375	831	NAD(+) synthetase	K01916	1441.63	2178.21	675.343	1239.09	0.595442	1.20054e-138		-1.68945	0	DOWN	0.875586	0
LBU_0376	2667	cation-transporting ATPase	K01537	211.988	201.322	385.362	297.391	-0.0744788	0.0661465		0.936714	0		-0.373857	4.67641e-82
LBU_0377	264	putative membrane protein		0	0	3.56907	11.044	0	0		4.05168	0.00156368		1.62964	0.000422525	UP
LBU_0378	210	putative membrane protein		0	2.16447	5.52226	12.5403	0	0		1.35124	0.0634109		1.18324	0.00890601
LBU_0379	603	ABC-type transport system ATP-binding protein	K01990	16.8586	19.0334	12.14	7.01881	0.175046	0.565826		-0.648757	0.00143345		-0.790476	0.00175724
LBU_0380	462	putative Zinc-dependent metalloprotease	K03095	42.3149	24.8422	16.4726	30.3328	-0.76837	0.00150852		-0.592723	0.00330784		0.880806	1.74228e-06
LBU_0381	624	membrane protein		70.1776	323.24	149.605	69.0318	2.20352	3.39047e-121	UP	-1.11144	1.19655e-101	DOWN	-1.11583	6.85743e-52	DOWN
LBU_0382	654	N-acetylmuramidase		29.8922	112.94	53.7502	27.7554	1.91771	4.5714e-38	UP	-1.07121	4.01677e-36	DOWN	-0.953501	3.93452e-16
LBU_0383	2262	ATP-dependent DNA helicase PcrA	K03657	97.8339	214.911	207.185	89.8109	1.13534	2.07351e-112	UP	-0.0528202	0.0628178		-1.20596	1.43504e-287	DOWN
LBU_0384	2016	DNA ligase	K01972	217.992	356.574	343.02	169.303	0.709926	8.36698e-76		-0.0559103	0.0163408		-1.01869	0	DOWN
LBU_0385	1146	sex pheromone biosynthesis protein		655.744	671.893	718.788	745.604	0.0350999	0.319963		0.0973346	7.63276e-06		0.0528435	0.010448
LBU_0386	306	glutamyl-tRNA Gln amidotransferase C subunit	K02435	1653.4	1903.57	2042.46	2235.43	0.20327	3.34133e-07		0.101599	4.86027e-05		0.130243	1.70678e-08
LBU_0387	1443	glutamyl-tRNA Gln amidotransferase A subunit	K02433	723.453	648.341	774.824	720.022	-0.158147	8.1713e-08		0.257117	1.4634e-41		-0.105827	3.93636e-09
LBU_0388	1431	glutamyl-tRNA Gln amidotransferase B subunit	K02434	1167.23	1269.44	1224.15	1170.88	0.1211	4.88891e-08		-0.0524085	0.000319783		-0.0641826	7.21137e-06
LBU_0389	927	diacylglycerol kinase catalytic domain protein	K07029	553.375	506.882	470.453	364.033	-0.126606	0.00277981		-0.1076	0.000198439		-0.369982	4.95307e-35
LBU_0390	723	integral membrane protein		269.312	259.804	288.014	315.198	-0.0518565	0.467645		0.148714	0.000681049		0.130119	0.00126502
LBU_0391	1356	putative RNA methyltransferase	K03215	272.77	318.027	352.189	349.574	0.221462	1.90193e-06		0.147202	3.12933e-07		-0.0107531	0.706361
LBU_0392	858	mrr restriction system protein		528.611	532.282	587.018	483.305	0.00998616	0.836903		0.141212	4.55819e-07		-0.280471	1.8677e-24
LBU_0393	636	carbonate dehydratase	K01674	629.518	457.398	407.071	428.853	-0.460798	2.12174e-20		-0.168169	5.67489e-06		0.0752036	0.0411434
LBU_0394	558	carbamoyl-phosphate synthase large subunit		131.731	98.565	117.552	36.0701	-0.418451	0.000355009		0.254153	0.0013896		-1.70442	7.63324e-69	DOWN
LBU_0395	375	carbamoyl-phosphate synthase large subunit		85.4964	167.27	63.009	17.8072	0.968247	2.22706e-12		-1.40855	1.06582e-46	DOWN	-1.8231	3.78864e-28	DOWN
LBU_0396	1887	cadmium transporting P-type ATPase	K01534	35.6387	30.0497	44.9781	261.073	-0.246094	0.0413865		0.581872	2.12006e-15		2.53716	0	UP
LBU_0397	228	putative heavy-metal-transporting ATPase		600.204	462.015	295.959	2083.17	-0.377511	8.71348e-06		-0.642545	4.02563e-22		2.81531	0	UP
LBU_0398	282	hypothetical protein		493.59	610.485	391.441	2593.1	0.306643	4.17676e-05		-0.641159	4.6045e-35		2.72781	0	UP
LBU_0399	651	Crp-like transcriptional regulator	K01420	120.12	174.903	67.2469	411.026	0.542085	1.32159e-08		-1.37902	7.4227e-81	DOWN	2.61169	0	UP
LBU_0400	1341	branched-chain amino acid transport system II carrier protein	K03311	26.2409	14.914	35.5642	102.328	-0.815147	6.36424e-06		1.25375	2.97387e-30	UP	1.5247	2.00982e-121	UP
LBU_0401	663	DNA alkylation repair enzyme		21.2302	25.0237	29.6259	106.536	0.237174	0.342369		0.243567	0.0958937		1.8464	1.72595e-82	UP
LBU_0402	507	NUDIX family hydrolase	K03426	44.7286	13.672	46.8902	88.1158	-1.70997	5.83326e-11	DOWN	1.77806	1.52188e-25	UP	0.910114	1.02458e-18
LBU_0403	573	diguanylate cyclase		9.55298	9.12252	11.6372	3.77521	-0.0665186	0.88054		0.351243	0.171229		-1.62412	8.61542e-08	DOWN
LBU_0404	447	Signal transduction diguanylate cyclase		5.24818	3.55903	15.404	7.15384	-0.560333	0.42783		2.11374	3.31632e-10	UP	-1.10651	5.38476e-05	DOWN
LBU_0405	282	maltose O-acetyltransferase		38.8217	35.4605	48.0627	25.6809	-0.130649	0.675205		0.438706	0.0155113		-0.904225	1.52833e-06
LBU_0406	345	membrane protein	K08987	61.1984	131.421	111.346	122.131	1.10263	3.25918e-11	UP	-0.239154	0.0124834		0.133389	0.161936
LBU_0407	486	AsnC family transcriptional regulator	K03719	701.529	691.162	1388.45	1413.88	-0.0214794	0.695588		1.00638	4.58683e-286	UP	0.0261833	0.260972
LBU_0408	1812	glucosamine--fructose-6-phosphate amidotransferase	K00820	506.215	342.472	359.918	418.147	-0.563763	2.16904e-64		0.0716819	0.00336554		0.216342	1.64362e-22
LBU_0409	336	transcriptional antiterminator		37.2371	94.3575	73.5582	115.046	1.3414	9.53049e-11	UP	-0.359251	0.00204823		0.645249	1.21755e-09
LBU_0410	210	mannitol-1-phosphate 5-dehydrogenase	K00009	74.4742	31.3849	55.2226	147.796	-1.24667	1.96358e-05	DOWN	0.81519	8.82355e-05		1.42028	6.2868e-26	UP
LBU_0411	240	mannitol-1-phosphate 5-dehydrogenase		32.5825	65.34	37.4478	81.1199	1.00387	0.000349493	UP	-0.803085	6.58171e-06		1.11517	5.98483e-12	UP
LBU_0412	2730	Phosphoenolpyruvate carboxylase	K01595	1268.93	1104.96	1241.18	2767.57	-0.19961	2.66545e-35		0.167715	7.3074e-55		1.15691	0	UP
LBU_0413	945	malate permease	K07088	43.0296	95.4773	35.7413	34.436	1.14983	2.13882e-22	UP	-1.41757	4.35136e-67	DOWN	-0.0536752	0.616542
LBU_0414	1623	ABC-type transport system ATP-binding protein		193.688	266.968	369.097	464.001	0.462934	3.83105e-22		0.467331	2.57328e-67		0.33013	2.9934e-48
LBU_0415	594	alpha-ketoglutarate transporter	K03761	7.89878	1.33913	3.90463	7.7585	-2.56033	0.000135935	DOWN	1.54389	0.0035343		0.990593	0.00268237		RPKM<10	pseudogene
LBU_0416	327	alpha-ketoglutarate transporter		2.39137	0.695014	4.21136	6.9029	-1.78273	0.231454		2.59917	0.00160563		0.712918	0.116877		RPKM<10	pseudogene
LBU_0417	366	putative membrane protein		10.6828	7.14099	15.0504	3.34064	-0.581092	0.284382		1.07561	0.000667217	UP	-2.17161	3.12749e-09	DOWN
LBU_0418	1200	major facilitator family transporter	K08161	44.9638	49.9993	87.036	86.5278	0.153144	0.232249		0.799703	1.73983e-31		-0.00844742	0.888571
LBU_0419	630	integral membrane protein, interacts with FtsH		305.344	438.306	437.869	283.798	0.5215	8.01087e-18		-0.00143801	0.970232		-0.625634	5.58398e-57
LBU_0420	786	glutamate racemase	K01776	193.008	392.373	137.306	135.574	1.02357	6.72275e-61	UP	-1.51483	1.61111e-248	DOWN	-0.0183132	0.759739
LBU_0421	1422	putative dipeptidase	K08659	999.196	1155.77	538.653	546.454	0.210011	4.34657e-19		-1.10142	0	DOWN	0.0207433	0.34471
LBU_0422	1086	putative glutamyl aminopeptidase	K01179	448.594	735.173	314.679	302.681	0.712674	1.31751e-84		-1.2242	0	DOWN	-0.0560826	0.0883078
LBU_0423	570	membrane protein	K16925	297.701	315.187	25.9401	4.45509	0.0823448	0.261385		-3.60295	0	DOWN	-2.54166	9.08735e-27	DOWN
LBU_0424	162	hypothetical protein		386.163	125.559	49.662	13.9336	-1.62084	5.64021e-26	DOWN	-1.33816	4.71137e-15	DOWN	-1.83357	1.39386e-10	DOWN
LBU_0425	627	uridine kinase	K00876	99.7741	79.7437	105.194	38.8508	-0.323294	0.0102291		0.399606	7.91697e-07		-1.43703	2.53548e-54	DOWN
LBU_0426	657	uridine kinase	K00876	119.023	104.641	178.386	82.886	-0.18579	0.0957604		0.769555	5.50646e-33		-1.1058	7.88949e-64	DOWN
LBU_0427	741	ABC-type glutamine transport system ATP-binding protein	K10041	1847.84	2422.22	1154.29	1204.78	0.390491	3.02289e-64		-1.06932	0	DOWN	0.0617576	0.00219689
LBU_0428	840	ABC-type glutamine transport system substrate-binding protein	K10039	1485.76	1635.53	915.056	831.129	0.138556	6.30159e-08		-0.837827	0		-0.138788	1.89477e-10
LBU_0429	642	ABC-type glutamine transport system permease protein	K10040	1383.69	1493.54	659.542	551.274	0.110213	0.000336259		-1.1792	0	DOWN	-0.258696	5.01792e-18
LBU_0430	669	ABC-type glutamine transport system permease protein	K10040	1424.86	1463.15	586.988	429.912	0.0382596	0.218222		-1.31768	0	DOWN	-0.449289	8.2594e-45
LBU_0431	813	ABC-type glutamine transport system substrate-binding protein	K02030	1441.8	1535.26	1117.06	686.128	0.0906056	0.000753589		-0.458774	5.87021e-134		-0.703156	5.90261e-226
LBU_0432	1512	exopolyphosphatase		158.775	158.728	128.325	85.3435	-0.000426341	0.996458		-0.30675	1.67251e-13		-0.588454	1.77884e-36
LBU_0433	2166	polyphosphate kinase	K00937	295.318	328.628	139.94	76.6398	0.154186	1.65903e-05		-1.23165	0	DOWN	-0.868642	1.90789e-109
LBU_0434	1398	hypothetical protein		315.477	554.844	136.82	66.1997	0.814548	2.53342e-103		-2.01981	0	DOWN	-1.04738	1.37671e-94	DOWN
LBU_0435	327	hypothetical protein		679.15	626.903	129	94.9149	-0.115489	0.0765384		-2.28087	6.81448e-287	DOWN	-0.44267	6.99274e-06
LBU_0436	636	hypothetical protein		2002.9	1611.79	2319.69	1935.46	-0.313425	7.11612e-31		0.525267	5.80867e-202		-0.261256	2.88431e-60
LBU_0437	246	hypothetical protein		696.152	277.158	507.358	571.576	-1.32869	1.7831e-51	DOWN	0.872293	4.82141e-43		0.171943	0.000890228
LBU_0438	498	hypothetical protein		80.0822	65.032	104.353	183.949	-0.300333	0.0582787		0.682254	8.81122e-13		0.817831	5.84007e-31
LBU_0439	921	ribokinase family sugar kinase	K00852	688.583	815.432	326.355	435.131	0.243933	3.97316e-12		-1.32112	0	DOWN	0.415007	1.14781e-39
LBU_0440	651	ribulose-phosphate 3-epimerase	K01783	768.766	1391.72	355.718	549.287	0.856253	4.45366e-131		-1.96806	0	DOWN	0.626825	1.20593e-73
LBU_0441	693	ribose 5-phosphate isomerase	K01807	1345.05	1504.8	342.004	510.432	0.161913	4.11725e-08		-2.13749	0	DOWN	0.577708	3.57837e-63
LBU_0442	936	putative nucleoside hydrolase	K12700	359.243	639.56	647.748	570.24	0.832121	5.37691e-83		0.0183529	0.474351		-0.183862	9.67025e-14
LBU_0443	723	GntR family transcriptional regulator	K03492	294.189	263.262	362.097	316.369	-0.160243	0.0159551		0.45988	1.81429e-29		-0.194772	2.5859e-07
LBU_0444	2403	xylulose-5-phosphate/fructose-6-phosphate phosphoketolase	K01636	4964.58	9918.39	1094.52	1197.74	0.998435	0		-3.1798	0	DOWN	0.130016	2.85762e-31
LBU_0445	273	collagen-binding protein		409.608	283.463	306.645	417.205	-0.531086	3.28734e-08		0.113409	0.101596		0.444189	9.31661e-14
LBU_0446	264	pilus protein		308.053	674.492	527.674	561.106	1.13062	8.99209e-42	UP	-0.354154	3.57077e-13		0.0886262	0.0777754
LBU_0447	300	sortase		735.061	370.071	522.578	395.018	-0.990062	1.18035e-41		0.497846	7.15447e-21		-0.403727	1.18633e-15
LBU_0448	1344	putative hemolysin		748.815	1112.25	872.452	974.95	0.570802	1.9714e-106		-0.350335	1.25139e-97		0.160252	7.77663e-22
LBU_0449	570	hypoxanthine-guanine phosphoribosyltransferase	K00760	1607.86	1683.19	2081.82	4281.35	0.0660575	0.0325468		0.306646	6.72392e-61		1.04022	0	UP
LBU_0450	1293	amino acid permease	K03294	62.2923	61.5192	62.8381	235.166	-0.018015	0.875095		0.0306022	0.666924		1.90397	0	UP
LBU_0451	687	lyzozyme m1 (1,4-beta-n-acetylmuramidase)		371.07	667.749	357.545	461.772	0.847614	6.58275e-66		-0.901181	1.77878e-162		0.369055	8.93675e-26
LBU_0452	1245	putative ATP-dependent RNA helicase		183.404	359.433	208.765	236.603	0.970697	1.69636e-80		-0.783845	2.78372e-125		0.180591	3.81605e-07
LBU_0453	1320	cellobiose-specific PTS system IIC component	K02761	45.0231	66.287	66.4397	41.6109	0.558062	3.30996e-07		0.00331944	0.961873		-0.675084	1.10238e-21
LBU_0454	246	membrane protein, putative toxin regulator		0	3.69544	31.8203	37.0855	1.21727	0.335871		3.10613	9.74338e-17	UP	0.220908	0.291205
LBU_0455	774	hypothetical protein		7.07217	24.9586	20.5078	10.8148	1.81931	2.84115e-10	UP	-0.283361	0.0557913		-0.923171	1.15264e-07
LBU_0456	1284	uracil permease	K02824	64.5559	56.1094	150.265	124.89	-0.202307	0.061512		1.4212	4.07916e-142	UP	-0.266856	2.02927e-09
LBU_0457	1251	putative aluminum resistance protein		158.771	133.164	135.226	232.16	-0.253741	0.000246219		0.0221622	0.653348		0.779751	1.80165e-87
LBU_0458	2088	ornithine decarboxylase	K01581	15.7295	17.0888	36.5869	15.6753	0.119578	0.479126		1.09828	8.76445e-39	UP	-1.22283	3.18602e-49	DOWN
LBU_0459	948	amino acid permease		2.47462	3.59604	3.82277	1.19053	0.539202	0.353015		0.0882083	0.795532		-1.68301	5.52141e-05	DOWN	RPKM<10	pseudogene
LBU_0460	237	hypothetical protein		3.29949	10.5484	4.89314	0	1.67671	0.0363825		-1.10819	0.0193997		-4.62412	0.000170043	DOWN
LBU_0461	1143	UDP-N-acetylglucosamine 2-epimerase	K01791	186.088	185.713	124.668	95.0394	-0.00290972	0.968257		-0.574988	1.48642e-35		-0.391488	1.24221e-13
LBU_0462	480	putative teichoic acid glycosylation protein		104.264	213.776	213.664	100.518	1.03586	1.47748e-21	UP	-0.0007531	0.989973		-1.08789	1.25244e-54	DOWN
LBU_0463	447	flavodoxin		264.159	642.914	531.031	302.355	1.28322	4.79036e-81	UP	-0.275829	3.03149e-13		-0.812552	6.04129e-77
LBU_0464	828	type I methionine aminopeptidase	K01265	302.214	135.044	506.482	491.842	-1.16214	1.03111e-60	DOWN	1.90708	0	UP	-0.0423166	0.154814
LBU_0465	915	ribonuclease BN	K07058	95.7177	104.196	178.07	135.373	0.122446	0.226062		0.773142	1.36706e-45		-0.395504	1.17798e-15
LBU_0466	915	UTP-glucose-1-phosphate uridylyltransferase	K00963	996.49	415.047	1014.79	693.312	-1.26358	3.18029e-248	DOWN	1.28984	0	UP	-0.54961	2.02718e-149
LBU_0467	969	alpha/beta superfamily hydrolase	K06889	79.8926	41.2791	143.613	85.8018	-0.952651	1.30802e-14		1.7987	5.05179e-144	UP	-0.743105	2.04252e-39
LBU_0468	1383	putative RNA methyltransferase	K00599	215.426	512.219	365.91	89.2236	1.24957	8.36216e-190	UP	-0.485275	7.14597e-85		-2.03599	0	DOWN
LBU_0469	816	regulatory protein RecX	K03565	96.7891	176.44	86.7802	90.5942	0.866264	2.2073e-22		-1.02374	4.43767e-64	DOWN	0.0620535	0.387597
LBU_0470	477	hypothetical protein		70.4929	115.779	66.7056	76.1092	0.715822	4.16384e-07		-0.795493	3.31092e-17		0.190263	0.0654062
LBU_0471	468	putative membrane protein		247.293	308.125	181.354	148.916	0.317297	0.000109918		-0.764708	8.41202e-40		-0.284313	2.62606e-05
LBU_0472	864	putative hemolysin	K03699	607.301	744.413	772.361	572.15	0.293692	1.63323e-14		0.0531718	0.0277666		-0.432883	3.36797e-70
LBU_0473	1572	peptide chain release factor 3	K02837	285.532	383.843	465.631	213.113	0.426864	2.80452e-26		0.278671	4.35514e-32		-1.12757	0	DOWN
LBU_0474	156	hypothetical protein		150.381	48.0763	3.25229	1.80869	-1.64522	9.18048e-11	DOWN	-3.8858	6.02572e-19	DOWN	-0.84651	0.393815
LBU_0475	1674	multicopper oxidase protein	K04753	115.849	166.108	26.9309	20.6195	0.519876	7.63231e-18		-2.62478	0	DOWN	-0.385252	4.55814e-05
LBU_0476	279	hypothetical protein		4159.35	1914.69	370.971	579.145	-1.11925	1.41744e-260	DOWN	-2.36773	0	DOWN	0.642617	1.36507e-35
LBU_0477	2196	ATP-dependent Clp protease ATP-binding subunit	K03697	852.13	1688.64	204.765	284.169	0.986714	0		-3.04382	0	DOWN	0.472781	4.58684e-77
LBU_0478	201	hypothetical protein		400.716	433.056	260.71	446.864	0.111974	0.291416		-0.732106	6.03316e-23		0.777388	5.7511e-28
LBU_0479	267	PTS system phosphocarrier protein HPr	K11189	3748.82	4004.46	3300.95	4928.04	0.095172	0.0010714		-0.278727	3.60672e-46		0.578135	3.71504e-231
LBU_0480	1728	phosphoenolpyruvate-protein phosphotransferase	K08483	3405.32	3770.53	2652.85	4746.36	0.146977	1.03961e-36		-0.507227	0		0.83928	0
LBU_0481	405	ArsC family protein	K16509	8619.15	7183.4	1408.07	3381	-0.262878	2.15086e-59		-2.35094	0	DOWN	1.26373	0	UP
LBU_0482	750	negative regulator of competence MecA	K16511	579.707	1068.32	321.326	937.385	0.881945	5.56991e-122		-1.73323	0	DOWN	1.5446	0	UP
LBU_0483	861	competence protein		16.348	9.8985	2.77797	22.721	-0.723832	0.0109419		-1.83318	1.95437e-10	DOWN	3.03193	1.227e-41	UP
LBU_0484	645	dithiol-disulfide isomerase		128.511	326.282	104.506	236.078	1.34422	4.6921e-64	UP	-1.64254	3.72456e-191	DOWN	1.17568	8.11544e-91	UP
LBU_0485	603	adenylate cyclase		42.7949	69.9146	24.2801	41.021	0.708156	1.23496e-05		-1.52582	9.48281e-36	DOWN	0.75659	2.31472e-08
LBU_0486	633	GTP pyrophosphokinase	K07816	240.894	394.76	306.636	435.343	0.712576	2.12814e-27		-0.364449	7.87734e-19		0.505627	3.00462e-39
LBU_0487	798	putative inorganic polyphosphate-ATP-NAD kinase	K00858	123.47	132.004	184.923	190.108	0.09642	0.317494		0.486339	5.71898e-19		0.0398916	0.424846
LBU_0488	909	ribosomal large subunit pseudouridine synthase	K06180	37.8516	48.0042	38.4326	23.7975	0.342805	0.023883		-0.32083	0.00113546		-0.691517	8.06582e-10
LBU_0489	189	putative membrane protein		128.261	132.273	136.139	133.862	0.0444378	0.832356		0.0415582	0.743151		-0.0243301	0.842699
LBU_0490	828	putative undecaprenol kinase	K06153	332.436	271.598	351.981	448.224	-0.291601	7.32094e-07		0.374025	1.01183e-22		0.348719	4.88268e-27
LBU_0491	1011	6-phosphogluconolactonase	K07404	159.335	237.048	325.334	370.161	0.573117	2.61309e-18		0.45674	3.45475e-36		0.186232	3.45032e-09
LBU_0492	381	glucitol/sorbitol-specific PTS system IIA component		188.824	289.008	392.075	331.033	0.614065	3.75812e-10		0.440019	3.35307e-16		-0.244153	1.3505e-06
LBU_0493	1137	conserved hypothetical protein		247.592	270.545	347.099	339.646	0.1279	0.0201103		0.35948	3.54791e-28		-0.0313157	0.309549
LBU_0494	558	TrmH family RNA methyltransferase	K03216	402.201	470.627	666.345	722.414	0.226669	0.000152672		0.501684	4.76123e-48		0.116556	0.000112738
LBU_0495	396	hypothetical protein		588.459	382.226	584.23	637.939	-0.622516	1.7641e-20		0.612109	5.30029e-43		0.126881	0.00092342
LBU_0496	2319	FtsK/SpoIIIE family protein	K03466	57.3249	42.7784	92.9202	61.3224	-0.422279	1.11575e-06		1.11911	1.1431e-109	UP	-0.599579	1.12511e-41
LBU_0497	1224	Zn-dependent peptidase		35.7768	24.6952	66.6173	36.96	-0.534798	0.00056001		1.43167	1.11325e-61	UP	-0.849933	1.65883e-29
LBU_0498	1254	putative metalloendopeptidase	K17732	115.364	210.143	232.871	225.455	0.86518	9.34034e-40		0.148162	5.92766e-05		-0.0466941	0.190678
LBU_0499	729	3-oxoacyl-(acyl-carrier-protein) reductase	K00059	173.773	142.784	255.021	218.165	-0.283372	0.00118479		0.836782	4.0793e-59		-0.225199	6.01386e-07
LBU_0500	1155	putative transcriptional regulator	K15539	298.574	399.247	400.113	300.559	0.419193	8.978e-20		0.0031255	0.917027		-0.412757	4.56401e-45
LBU_0502	564	CDP-diacylglycerol--glycerol-3- phosphate 3-phosphatidyltransferase	K00995	77.6433	198.861	290.561	177.598	1.35683	2.9863e-35	UP	0.547082	1.52567e-25		-0.710225	9.41108e-43
LBU_0503	1110	RecA protein	K03553	279.681	936.515	407.453	397.476	1.74352	0	UP	-1.20067	0	DOWN	-0.0357678	0.211844
LBU_0504	1644	conserved hypothetical protein	K06950	1826.05	2345	2913.43	1973.32	0.360863	4.36957e-118		0.313131	3.93428e-251		-0.562093	0
LBU_0505	1200	undecaprenyl-phosphateN-acetyl-glucosaminyltransferase	K02851	71.0298	115.908	101.653	53.6096	0.706478	1.27737e-15		-0.189326	0.000448741		-0.923084	1.11786e-49
LBU_0506	660	yvye		59.2409	67.1479	60.2899	63.9839	0.180749	0.227827		-0.155425	0.105113		0.085792	0.368179
LBU_0507	1278	putative competence protein ComFA	K02240	7.34253	26.2303	7.59959	10.2294	1.83688	4.5185e-17	UP	-1.78724	1.25254e-35	DOWN	0.428735	0.0162139
LBU_0508	639	putative competence protein ComFC	K02242	13.4613	15.8271	9.64127	10.1558	0.233576	0.470051		-0.7151	0.0011075		0.0750163	0.760221
LBU_0509	558	ribosomal protein S30EA	K05808	6488.47	7575.45	461.246	367.275	0.223454	7.13161e-53		-4.03772	0	DOWN	-0.328676	2.55505e-17
LBU_0510	2403	putative preprotein translocase SecA subunit	K03070	255.128	252.238	439.101	486.151	-0.0164333	0.687505		0.799765	1.85689e-303		0.146852	8.95019e-17
LBU_0511	999	peptide chain release factor 2	K02836	161.249	198.605	118.26	173.417	0.300612	1.55819e-05		-0.747939	3.56651e-52		0.552284	2.33788e-29
LBU_0512	303	conserved hypothetical protein		570.355	662.682	592.037	997.634	0.216458	0.00162022		-0.162631	0.000272804		0.752824	1.08803e-85
LBU_0513	951	HPr kinase/phosphatase	K06023	343.709	557.181	266.673	412.504	0.696958	1.76678e-54		-1.06307	5.42345e-246	DOWN	0.629333	3.35208e-81
LBU_0514	834	prolipoprotein diacylglyceryl transferase	K13292	285.976	285.586	159.994	226.672	-0.00196805	0.976647		-0.835906	3.81327e-75		0.502589	4.11511e-27
LBU_0515	1017	glycerol-3-phosphate dehydrogenase	K00057	245.282	378.112	188.362	230.09	0.624376	4.36565e-33		-1.00531	1.85287e-163	DOWN	0.288693	1.01469e-12
LBU_0516	933	thioredoxin reductase	K00384	1284.02	4131.66	526.934	1023.99	1.68605	0	UP	-2.97103	0	DOWN	0.958504	0
LBU_0517	2043	excinuclease ABC B subunit	K03702	152.339	365.823	78.3334	492.081	1.26386	9.4882e-204	UP	-2.22345	0	DOWN	2.6512	0	UP
LBU_0518	2649	excinuclease ABC A subunit	K03701	167.377	388.907	87.3367	375.391	1.21632	4.17068e-264	UP	-2.15476	0	DOWN	2.10373	0	UP
LBU_0519	543	membrane protein		2409.3	1470.14	423.399	1142.31	-0.712665	8.86731e-138		-1.79586	0	DOWN	1.43186	0	UP
LBU_0520	693	D-aminopeptidase	K16203	64.3187	140.691	17.1525	137.346	1.12922	1.94811e-23	UP	-3.03604	1.06929e-186	DOWN	3.00132	1.23547e-194	UP
LBU_0521	480	conserved hypothetical protein	K01266	267.176	281.009	46.2058	161.848	0.0728266	0.394255		-2.60447	2.02098e-220	DOWN	1.80849	4.35166e-88	UP
LBU_0522	159	peptidase T4		24.5905	299.453	25.9833	85.1792	3.60615	5.68196e-48	UP	-3.52667	1.53743e-104	DOWN	1.71292	1.77242e-15	UP
LBU_0523	942	putative ATPase	K06958	410.083	574.085	245.6	339.166	0.48535	1.1908e-29		-1.22496	0	DOWN	0.465683	3.82933e-39
LBU_0524	1020	protein yjif		1047.24	1923.55	518.443	822.678	0.877179	2.68667e-294		-1.89151	0	DOWN	0.666144	4.79501e-190
LBU_0525	933	sporulation transcription regulator whia	K09762	641.173	1227.82	348.726	466.026	0.93731	1.72069e-192		-1.81593	0	DOWN	0.418318	1.60074e-43
LBU_0526	585	ATP-dependent Clp protease proteolytic subunit	K01358	1100.12	1328.26	674.99	895.664	0.271884	4.3702e-15		-0.976605	0		0.408092	7.23171e-50
LBU_0527	1563	signal peptide protein		160.598	117.924	182.103	238.65	-0.445597	1.48157e-12		0.626897	9.34966e-55		0.39014	3.64101e-33
LBU_0528	207	ABC superfamily ATP binding cassette transporter, binding protein		0	0	3.85158	1.36307	0	0		3.81067	0.00437819		-1.49859	0.0867423		RPKM<10	pseudogene
LBU_0529	372	conserved hypothetical protein	K05832	4.20419	2.74923	1.5587	0.758484	-0.612801	0.485701		-0.818682	0.250623		-1.03915	0.277066		RPKM<10	pseudogene
LBU_0530	765	ABC-type transport system ATP-binding protein	K05833	6.13317	17.9736	1.98964	1.10649	1.55118	2.2383e-06	UP	-3.1753	8.09811e-29	DOWN	-0.84651	0.135837
LBU_0531	1149	central glycolytic genes regulator	K05311	1699.39	1708.87	2057.44	1602.24	0.00802638	0.724389		0.267803	5.40098e-93		-0.360759	6.19712e-175
LBU_0532	1017	glyceraldehyde 3-phosphate dehydrogenase	K00134	14632.3	9010	16512	17033.4	-0.699559	0		0.873918	0		0.0448488	8.97249e-24
LBU_0533	1212	phosphoglycerate kinase	K00927	2960.81	1887.35	4175.77	4331.05	-0.64963	0		1.14568	0	UP	0.0526731	1.30165e-10
LBU_0534	759	triosephosphate isomerase	K01803	2119.28	1891.22	2954.48	3709.29	-0.164256	4.05238e-12		0.643586	0		0.328241	1.66887e-174
LBU_0535	219	acetyltransferase		610.587	469.587	104.583	247.799	-0.378804	1.03702e-05		-2.16675	4.83171e-136	DOWN	1.24453	2.3583e-36	UP
LBU_0536	300	GNAT family acetyltransferase		1079.13	1576.87	189.655	378.403	0.547195	3.75723e-32		-3.05562	0	DOWN	0.996544	1.95051e-52
LBU_0537	570	hypothetical protein		260.66	543.454	80.4906	176.719	1.05999	1.10685e-64	UP	-2.75527	0	DOWN	1.13456	2.43546e-57	UP
LBU_0538	885	HAD superfamily hydrolase	K07024	387.897	491.519	124.649	231.145	0.341572	3.4748e-13		-1.97938	0	DOWN	0.89093	1.4442e-77
LBU_0539	684	uracil-DNA glycosylase	K03648	293.814	374.962	185.12	281.881	0.351841	1.0512e-08		-1.01828	6.97654e-112	DOWN	0.606627	3.31678e-38
LBU_0540	990	phosphate acetyltransferase	K00625	269.348	336.313	195.183	271.611	0.320331	2.3428e-09		-0.784981	7.18581e-94		0.476717	1.42695e-34
LBU_0541	486	conserved hypothetical protein	K06925	202.735	156.423	94.4025	83.4083	-0.374143	0.000191227		-0.728558	4.53001e-20		-0.178635	0.0509254
LBU_0542	537	DNA polymerase III, epsilon subunit related 3'-5' exonuclease	K02342	65.529	37.8783	54.7984	23.4692	-0.790763	1.10059e-05		0.532763	1.78686e-05		-1.22336	6.93284e-20	DOWN
LBU_0543	894	UDP-N-acetylenolpyruvoylglucosamine reductase	K00075	372.621	454.031	308.403	248.701	0.285081	3.55145e-09		-0.557972	4.13873e-63		-0.310404	1.04698e-16
LBU_0544	1089	ABC-type spermidine/putrescine transport system ATP-binding protein	K11072	213.267	309.496	144.693	124.539	0.537258	1.41883e-22		-1.09692	3.26156e-165	DOWN	-0.216398	1.0104e-05
LBU_0545	813	ABC-type spermidine/putrescine transport system permease protein	K11071	201.987	214.131	126.416	87.9207	0.0842294	0.258428		-0.760316	2.9286e-47		-0.523903	1.7158e-16
LBU_0546	804	ABC-type spermidine/putrescine transport system permease protein	K11070	160.481	162.255	94.5661	80.2483	0.0158591	0.86147		-0.778865	2.84913e-37		-0.236851	0.000874901
LBU_0547	1083	ABC-type spermidine/putrescine transport system substrate-binding protein	K11069	525.652	712.237	344.73	252.976	0.438251	8.21051e-35		-1.04689	0	DOWN	-0.446464	3.33745e-42
LBU_0548	840	membrane protein		292.311	430.73	218.733	129.21	0.559278	7.43418e-26		-0.977612	5.09042e-147		-0.75946	1.74766e-53
LBU_0549	951	YbbR		315.752	408.177	254.86	127.282	0.370404	1.1971e-13		-0.67949	3.25381e-85		-1.00168	4.23127e-111	DOWN
LBU_0550	1353	phosphoglucomutase	K03431	601.656	824.251	485.876	246.356	0.454146	5.00697e-53		-0.762496	2.16277e-295		-0.979841	4.81817e-288
LBU_0551	813	HAD superfamily hydrolase	K07024	132.735	135.439	78.8094	142.061	0.0291028	0.765879		-0.781208	7.30778e-32		0.850075	3.49781e-41
LBU_0552	339	putative esterase		64.5883	44.5824	33.3535	75.1861	-0.534798	0.0155865		-0.418637	0.0143939		1.17263	2.24922e-16	UP
LBU_0553	690	putative esterase		315.058	788.198	56.4081	99.368	1.32294	2.05346e-159	UP	-3.80458	0	DOWN	0.816879	1.6847e-23
LBU_0554	375	copper-binding protein		1745.38	5582.65	194.439	251.056	1.67741	0	UP	-4.84356	0	DOWN	0.368694	1.3341e-08
LBU_0555	1917	copper-transporting ATPase	K17686	418.524	1404.34	80.1549	64.6638	1.74651	0	UP	-4.13096	0	DOWN	-0.309831	6.9193e-10
LBU_0556	387	integral membrane protein for chromosome condensation		38.3918	69.5903	28.2802	11.6654	0.85809	3.77562e-05		-1.2991	1.16044e-18	DOWN	-1.27756	9.78794e-09	DOWN
LBU_0557	360	integral membrane protein for chromosome condensation		13.033	12.3104	10.4693	11.234	-0.0822859	0.864316		-0.23372	0.452817		0.101708	0.746544
LBU_0558	786	hypothetical protein		18.9028	18.65	11.25	3.11113	-0.0194259	0.942565		-0.729247	6.24156e-05		-1.85441	1.18101e-11	DOWN
LBU_0559	783	GGDEF family protein		144.811	240.912	176.802	60.1789	0.734333	4.43997e-22		-0.446368	1.41641e-20		-1.55481	5.34909e-126	DOWN
LBU_0560	942	hypothetical protein		125.349	277.332	141.266	39.5378	1.14566	6.35688e-62	UP	-0.973198	7.89247e-106		-1.83711	5.44578e-153	DOWN
LBU_0561	162	hypothetical protein		111.022	272.864	96.6395	21.481	1.29734	8.30378e-14	UP	-1.4975	1.98755e-36	DOWN	-2.16955	1.134e-23	DOWN
LBU_0562	678	Signal transduction diguanylate cyclase		189.151	389.509	112.247	26.0793	1.04212	7.25795e-54	UP	-1.79498	5.52507e-271	DOWN	-2.1057	3.23118e-105	DOWN
LBU_0563	690	Signal transduction diguanylate cyclase		87.2644	172.099	54.5173	9.81412	0.979775	1.11534e-22		-1.65845	4.40552e-110	DOWN	-2.47378	8.15077e-64	DOWN
LBU_0564	411	hypothetical protein		131.281	58.0616	35.0936	4.11907	-1.177	2.11851e-14	DOWN	-0.726378	3.35029e-07		-3.09082	1.2439e-31	DOWN
LBU_0565	459	protein-tyrosine phosphatase	K01104	59.6281	100.266	87.9546	33.8095	0.749769	1.53513e-06		-0.189002	0.0451443		-1.37933	6.78434e-32	DOWN
LBU_0566	381	nucleoside-diphosphate-sugar epimerase		215.506	85.8972	144.579	69.8601	-1.32705	2.44165e-25	DOWN	0.751173	1.11187e-15		-1.04931	2.06743e-28	DOWN
LBU_0567	1632	amino acid permease		35.9366	28.548	68.527	16.0211	-0.332064	0.0107769		1.26328	1.31497e-69	UP	-2.0967	4.59099e-153	DOWN
LBU_0568	528	putative peptide methionine sulfoxide reductase	K07304	22.2153	38.3087	103.64	61.4544	0.786117	0.000980159		1.43584	4.25544e-42	UP	-0.753998	9.11128e-17
LBU_0569	849	putative esterase of the alpha-beta hydrolase superfamily		70.9216	26.6353	106.628	79.5399	-1.41289	1.0494e-20	DOWN	2.00118	1.58196e-108	UP	-0.422835	2.33388e-10
LBU_0570	882	ABC-type transport system substrate binding protein	K11704	191.505	187.201	201.004	39.7748	-0.0327941	0.674998		0.102632	0.0300043		-2.33729	4.32109e-276	DOWN
LBU_0571	528	integral membrane protein		50.3547	34.4348	94.9923	77.1298	-0.54826	0.00625498		1.46394	8.20877e-40	UP	-0.300522	0.000690885
LBU_0573	732	transcriptional regulator		922.992	873.995	1370.58	1037.53	-0.0786939	0.0330171		0.649088	7.74126e-201		-0.401636	2.23331e-91
LBU_0574	972	competence protein	K02243	7.24055	9.82029	3.65381	11.9984	0.439667	0.191557		-1.42636	1.93265e-08	DOWN	1.71537	1.51423e-13	UP
LBU_0575	999	putative competence protein ComGB		8.61038	9.89613	11.1005	8.5673	0.200786	0.54155		0.165687	0.393175		-0.37371	0.0522931
LBU_0576	324	putative competence protein ComGC		26.5487	62.429	11.1851	36.5758	1.23358	1.42538e-06	UP	-2.48063	1.05681e-32	DOWN	1.70931	1.11122e-13	UP
LBU_0577	438	Putative Competence protein ComGD		14.2827	52.1475	10.4252	18.4668	1.86833	2.70304e-12	UP	-2.32253	4.0162e-34	DOWN	0.824868	0.00063633
LBU_0578	267	competence protein ComGF		8.78629	51.0718	18.4592	14.7947	2.5392	6.55849e-11	UP	-1.46819	6.26008e-12	DOWN	-0.319263	0.270324
LBU_0579	549	N-terminal cleavage protein		21.3656	12.0051	8.44936	23.1275	-0.831635	0.00878015		-0.506738	0.054593		1.4527	8.73767e-12	UP
LBU_0580	999	adenine-specific DNA methylase	K00571	40.7036	82.0127	91.4883	111.187	1.01069	7.73517e-17	UP	0.15774	0.0176649		0.281323	1.84221e-06
LBU_0581	1188	acetate kinase	K00925	353.471	171.983	411.938	386.342	-1.03933	1.74023e-84	DOWN	1.26016	8.6981e-298	UP	-0.092551	0.000712926
LBU_0582	156	hypothetical protein		165.419	247.666	160.292	157.959	0.582271	0.000464333		-0.627696	1.11326e-08		-0.0211468	0.865499
LBU_0583	726	two-component system response regulator	K02483	132.484	165.287	150.85	105.582	0.319154	0.000398656		-0.131863	0.0224671		-0.514749	5.65993e-17
LBU_0584	1566	two-component system sensor histidine kinase		127.334	128.365	142.83	85.1633	0.0116393	0.872999		0.154047	0.000268168		-0.745998	7.76951e-63
LBU_0585	2223	putative phosphoglycerol transferase		160.054	220.011	131.983	108.564	0.459014	1.88262e-24		-0.737226	3.95895e-123		-0.281805	5.84986e-15
LBU_0586	627	glycopeptide antibiotics resistance protein		188.324	426.085	111.552	226.355	1.17793	4.30014e-66	UP	-1.93343	6.06405e-303	DOWN	1.02087	9.45258e-68	UP
LBU_0587	1341	glucose-6-phosphate isomerase	K01810	1293.39	973.056	1118.65	1991.5	-0.410557	4.72415e-68		0.201165	4.4911e-35		0.832098	0
LBU_0588	492	ABC-type oligopeptide transport system substrate-binding protein	K02035	449.797	571.177	154.829	264.569	0.344663	4.16622e-09		-1.88326	0	DOWN	0.772964	1.7731e-39
LBU_0589	963	ABC-type oligopeptide transport system substrate-binding protein		511.575	683.225	145.11	207.246	0.417414	1.98485e-27		-2.23522	0	DOWN	0.514202	1.09079e-29
LBU_0590	1005	putative esterase		80.1432	145.52	114.597	60.3617	0.86057	1.79295e-22		-0.34465	1.39476e-10		-0.924865	3.90158e-47
LBU_0591	252	hypothetical protein		9.30928	9.01864	24.4475	13.436	-0.04576	0.945979		1.43871	5.81854e-06	UP	-0.863583	0.00196632
LBU_0592	1356	putative UDP-N-acetylmuramyl tripeptide synthetase	K01928	73.8152	75.5889	121.975	62.5626	0.034258	0.733052		0.690342	3.06234e-38		-0.963217	1.28707e-71
LBU_0593	603	putative thymidine kinase	K00857	236.02	278.339	325.738	169.075	0.237934	0.00160025		0.226866	6.19336e-07		-0.946045	2.75029e-82
LBU_0594	1086	peptide chain release factor 1	K02835	228.257	228.211	262.221	188.537	-0.00029059	0.997112		0.200415	9.79967e-08		-0.475938	2.02818e-36
LBU_0595	843	protoporphyrinogen oxidase	K02493	277.357	344.274	419.918	213.765	0.311816	5.7099e-08		0.286547	4.35676e-17		-0.974083	2.55519e-154
LBU_0596	996	putative SUA5 family translation factor	K07566	148.388	117.742	204.413	102.928	-0.333741	3.92109e-05		0.795856	2.16807e-59		-0.989846	8.72734e-92
LBU_0597	630	uracil phosphoribosyltransferase	K00761	1212.69	1082.6	2131.02	2585.09	-0.163713	2.19198e-06		0.977045	0		0.278671	7.38884e-75
LBU_0598	720	ATP synthase F0 A subunit	K02108	1909.33	1496.67	3797.13	3713.36	-0.351317	7.22128e-41		1.34316	0	UP	-0.0321851	0.00503312
LBU_0599	225	ATP synthase F0 C subunit		1789.86	1269.68	2517.78	1840.49	-0.495385	3.15716e-23		0.987689	3.96414e-233		-0.452061	1.11539e-64
LBU_0600	507	ATP synthase F0 B subunit	K02109	4139.71	3396.27	6249.4	6184.06	-0.285579	3.67291e-42		0.879768	0		-0.0151647	0.158579
LBU_0601	543	ATP synthase F1 delta subunit	K02113	2452.51	2212.84	4609.06	4326.57	-0.148355	1.21128e-08		1.05857	0	UP	-0.0912519	2.20302e-14
LBU_0602	1512	ATP synthase F1 alpha subunit	K02111	2787.61	3232.2	4143.37	3395.14	0.213489	6.11677e-56		0.358287	0		-0.287334	1.42459e-301
LBU_0603	963	ATP synthase F1 gamma subunit	K02115	5595.66	5292.34	5972.99	4597.51	-0.0804029	2.80935e-10		0.174547	1.76109e-99		-0.377599	0
LBU_0604	1440	ATP synthase F1 beta subunit	K02112	2832.5	3634.97	2770.33	2172.6	0.359867	3.36558e-159		-0.391885	0		-0.350636	2.751e-279
LBU_0605	441	ATP synthase F1 epsilon subunit	K02114	6809.07	4175.11	2761.79	2637.93	-0.705643	0		-0.596214	0		-0.0661931	0.000119675
LBU_0606	246	membrane protein		139.866	188.929	103.416	637.718	0.4338	0.00347653		-0.869387	6.89062e-17		2.62446	7.88856e-279	UP
LBU_0607	990	Actin-like ATPase involved in cell morphogenesis	K03569	329.379	566.108	586.792	1055.76	0.781328	6.31554e-70		0.0517725	0.0458108		0.847357	0
LBU_0608	288	alpha-hemolysin family protein	K08998	733.106	1086.63	1026.04	2043.02	0.567772	3.97346e-23		-0.0827779	0.0195884		0.993615	5.6038e-264
LBU_0609	228	hypothetical protein		1046.07	1310.79	1488.06	2531.57	0.325456	9.45478e-09		0.182997	9.8849e-08		0.7666	2.30265e-167
LBU_0610	1191	cell division protein	K05837	900.819	838.761	867.139	1237.76	-0.102979	0.000387703		0.0480042	0.0133353		0.513395	4.72685e-209
LBU_0611	462	putative universal stress protein		2591.36	1641.31	203.79	197.876	-0.658864	4.52837e-110		-3.00969	0	DOWN	-0.0424905	0.50472
LBU_0612	285	putative membrane protein		49.3882	116.027	69.1736	73.5916	1.23222	6.13472e-10	UP	-0.74617	7.29264e-10		0.0893198	0.511116
LBU_0613	1305	chromosomal segregation helicase	K07478	149.205	273.159	101.527	69.6922	0.872442	4.8051e-54		-1.42788	6.09328e-263	DOWN	-0.542796	3.85725e-22
LBU_0614	465	hypothetical protein		60.5403	116.567	82.9229	63.3081	0.945195	1.68847e-10		-0.49132	5.9264e-08		-0.389381	0.000142393
LBU_0615	612	30S ribosomal protein S4	K02986	3320.86	2374.45	5648.44	5093.87	-0.483964	3.05877e-107		1.25026	0	UP	-0.14909	3.17542e-48
LBU_0616	1719	cell division regulatory protein	K06286	211.53	330.46	205.507	166.055	0.643611	7.71446e-51		-0.685291	8.6821e-126		-0.307527	1.14673e-20
LBU_0617	1158	cysteine sulfinate desulfinase/cysteine desulfurase	K04487	267.413	321.965	517.622	204.348	0.267838	1.01972e-07		0.684994	1.53836e-132		-1.34087	0	DOWN
LBU_0618	1218	thiamine biosynthesis protein ThiI	K03151	274.142	288.565	525.21	214.204	0.0739732	0.15404		0.863996	1.86236e-210		-1.29391	0	DOWN
LBU_0619	726	16S pseudouridylate synthase	K06183	300.513	278.452	405.826	137.58	-0.109996	0.095151		0.543432	3.66982e-44		-1.56059	8.0872e-268	DOWN
LBU_0620	2640	valyl-tRNA synthetase	K01873	299.759	218.015	472.079	138.477	-0.459373	8.59853e-39		1.1146	0	UP	-1.76938	0	DOWN
LBU_0621	1266	folylpolyglutamate synthase	K11754	277.337	119.29	384.955	92.269	-1.21717	5.65212e-91	DOWN	1.69022	0	UP	-2.06077	0	DOWN
LBU_0622	681	putative hydrolase	K01112	109.087	114.636	238.619	55.7959	0.0715851	0.530611		1.05765	5.57246e-76	UP	-2.09648	1.21118e-221	DOWN
LBU_0623	615	DNA repair protein	K03630	138.595	136.362	402.468	73.7123	-0.0234329	0.835785		1.56144	8.4641e-209	UP	-2.4489	0	DOWN
LBU_0624	1005	Actin-like ATPase involved in cell morphogenesis	K03569	1872.08	1624.81	2439.28	1720.64	-0.204374	1.27101e-20		0.586187	0		-0.503514	0
LBU_0625	726	rod shape-determining protein MreC	K03570	126.021	138.052	170.816	166.858	0.131545	0.181534		0.307232	1.20481e-07		-0.0338244	0.540883
LBU_0626	540	putative cell shape determining protein		66.6131	71.5479	75.8352	49.2902	0.103103	0.527343		0.0839589	0.399103		-0.621566	1.44384e-09
LBU_0627	330	hypothetical protein		2.36963	13.7739	15.1548	14.2503	2.5392	0.000186593	UP	0.137839	0.637507		-0.0887855	0.752428
LBU_0628	432	conserved hypothetical protein	K03925	774.739	1486.72	986.696	1126.45	0.940353	4.58439e-109		-0.591457	1.14915e-109		0.191101	4.52278e-12
LBU_0629	945	S-adenosyl-methyltransferase MraW	K03438	370.716	521.518	477.445	398.004	0.492401	7.85864e-28		-0.127381	6.59367e-06		-0.262552	1.27332e-19
LBU_0630	357	putative cell division protein		976.927	1160.22	1100.59	956.591	0.248078	1.86061e-07		-0.0761171	0.0134242		-0.202309	5.14406e-11
LBU_0631	2163	penicillin-binding protein	K08724	135.21	130.341	189.023	105.618	-0.0529141	0.358726		0.536272	2.88826e-59		-0.839706	6.17808e-139
LBU_0632	960	phospho-N-acetylmuramoyl-pentapeptide-transferase	K01000	86.3436	62.6175	160.739	63.975	-0.463522	2.87311e-05		1.36008	9.6063e-107	UP	-1.32914	3.6194e-111	DOWN
LBU_0633	1383	UDP-N-acetylmuramoylalanine-D-glutamate ligase	K01925	88.2059	80.44	207.115	107.857	-0.132963	0.133958		1.36444	1.20037e-197	UP	-0.941307	2.62221e-118
LBU_0634	1113	UDP-N-acetylglucosamine--N- acetylmuramyl-(pentapeptide) pyrophosphoryl-undecaprenol N-acetylglucosamine transferase	K02563	208.668	125.682	311.864	160.133	-0.73143	1.08438e-26		1.31114	4.80449e-225	UP	-0.961644	3.52051e-148
LBU_0635	846	cell division protein FtsQ	K03589	115.541	107.725	220.952	112.507	-0.101051	0.31301		1.03638	2.34327e-84	UP	-0.97372	3.61616e-82
LBU_0636	1383	cell division protein	K03590	521.885	450.102	700.637	392.529	-0.213479	2.36342e-09		0.638413	1.87664e-188		-0.835866	0
LBU_0637	1359	cell division protein FtsZ	K03531	1214.11	1718.82	1087.67	1075.06	0.501519	2.87799e-131		-0.660172	0		-0.0168327	0.288704
LBU_0638	447	conserved hypothetical protein	K09772	2398.42	2609.53	1545.1	1167.76	0.121708	1.2036e-05		-0.756094	1.98801e-304		-0.403954	4.78547e-64
LBU_0639	303	cell division protein		270.983	273.399	220.07	81.9463	0.0128039	0.909524		-0.313042	1.10992e-05		-1.42521	3.03589e-54	DOWN
LBU_0640	798	putative cell division protein		82.3136	146.244	84.9229	19.6826	0.829177	3.63996e-17		-0.784155	6.91091e-34		-2.10924	4.60498e-94	DOWN
LBU_0641	2796	isoleucyl-tRNA synthetase	K01870	489.716	262.669	784.056	1010.86	-0.898701	3.0475e-214		1.57771	0	UP	0.366551	3.32296e-215
LBU_0642	210	cold-shock protein CspB		949.546	201.296	882.871	957.987	-2.23792	4.14707e-122	DOWN	2.13288	4.03046e-239	UP	0.117803	0.00614982
LBU_0643	558	ADP-ribose pyrophosphatase	K01515	421.82	309.95	861.313	1155.26	-0.444593	8.2474e-12		1.4745	0	UP	0.423602	2.95454e-65
LBU_0644	207	hypothetical protein		117.108	16.4688	176.822	155.845	-2.83003	1.75156e-20	DOWN	3.42449	6.31136e-79	UP	-0.182192	0.0762966
LBU_0645	699	MTA/SAH nucleosidase(5-methylthioadenosine/S-adenosylhomocysteine nucleosidase)	K01243	234.929	127.453	606.278	452.23	-0.882261	4.31946e-26		2.25001	0	UP	-0.422923	2.68379e-43
LBU_0646	1164	cysteine sulfinate desulfinase/cysteine desulfurase	K04487	298.953	122.519	625.355	445.454	-1.28692	2.89642e-98	DOWN	2.35167	0	UP	-0.489398	2.17395e-95
LBU_0647	342	hypothetical protein		562.476	945.628	637.694	463.935	0.74948	3.61923e-38		-0.568409	2.84e-52		-0.458941	1.62571e-26
LBU_0648	1128	tRNA (5-methylaminomethyl-2-thiouridylate)-methyltransferase	K00566	301.561	725.53	390.735	319.927	1.26658	9.6544e-224	UP	-0.892846	4.33615e-284		-0.288447	1.1061e-22
LBU_0649	660	phosphoglycerate mutase	K15634	150.472	154.612	148.583	235.273	0.0391613	0.697069		-0.0573828	0.360105		0.663061	3.91959e-36
LBU_0650	654	tpr repeat protein		68.1542	69.6752	83.008	108.145	0.0318428	0.83679		0.252606	0.00388101		0.38165	3.81589e-07
LBU_0651	2391	exodeoxyribonuclease V alpha subunit	K03581	69.6619	102.324	74.6925	102.509	0.554697	1.13125e-17		-0.454103	4.8817e-27		0.456718	2.31701e-29
LBU_0652	1350	putative pyridine nucleotide-disulfide oxidoreductase		6769.05	8960.48	671	853.992	0.404624	0		-3.73919	0	DOWN	0.347909	1.78682e-80
LBU_0653	1680	metallo-beta-lactamase superfamily protein	K12574	831.784	1239.16	1205.19	703.431	0.575082	1.0377e-149		-0.0401029	0.00319051		-0.77678	0
LBU_0654	234	hypothetical protein		1878.09	2116.33	2132.57	1416.81	0.172299	6.4493e-05		0.0110332	0.698911		-0.589951	8.1605e-92
LBU_0655	555	peptide deformylase	K01462	615.721	475.628	861.006	413.829	-0.372442	2.7875e-12		0.856189	2.97744e-155		-1.05699	1.7887e-237	DOWN
LBU_0656	1830	GTP-binding protein TypA/BipA	K06207	644.813	770.978	1236.55	385.51	0.25781	6.53105e-24		0.681559	0		-1.68148	0	DOWN
LBU_0657	1203	cell division protein	K03588	67.6025	95.3097	125.137	90.0648	0.495545	1.53078e-07		0.392818	1.75036e-13		-0.474478	7.6442e-20
LBU_0658	342	hypothetical protein		306.39	383.434	442.507	293.706	0.323613	0.000172845		0.206721	6.53728e-05		-0.591327	5.05713e-29
LBU_0659	552	methylase	K08316	141.663	209.154	238.579	164.25	0.562103	3.2864e-09		0.189901	0.000616109		-0.538571	1.00193e-21
LBU_0660	495	phosphopantetheine adenylyltransferase	K00954	131.12	174.929	187.129	114.572	0.415882	0.000112722		0.0972677	0.139628		-0.707775	1.12394e-24
LBU_0661	1041	Lon-like protease	K07177	187.795	173.563	175.942	105.165	-0.113699	0.102921		0.0196416	0.677678		-0.742452	2.54321e-51
LBU_0662	747	DNA uptake protein related DNA-binding protein	K02237	0	24.6437	8.73249	1.00725	5.55712	4.04308e-23	UP	-1.49675	4.95224e-16	DOWN	-3.11597	3.37676e-15	DOWN
LBU_0663	2259	putative competence protein ComEC	K02238	5.53859	7.79699	6.19237	3.24748	0.493399	0.0450366		-0.332425	0.0333275		-0.931172	5.48778e-07		RPKM<10
LBU_0664	990	DNA polymerase III delta subunit	K02340	108.213	116.964	90.1237	105.072	0.112181	0.220523		-0.376081	5.84441e-10		0.221403	0.000257722
LBU_0665	285	ribosomal protein S20	K02968	1360.92	707.327	1969.67	886.069	-0.944132	7.76872e-67		1.4775	0	UP	-1.15246	0	DOWN
LBU_0666	270	30S ribosomal protein S15	K02956	3843.28	2224.3	4049.46	597.753	-0.788991	1.68868e-130		0.864382	0		-2.76011	0	DOWN
LBU_0667	1713	Metallo beta subunit lactamase	K07021	189.446	220.636	264.193	175.366	0.219879	9.71523e-06		0.259925	4.69342e-18		-0.591223	1.00044e-83
LBU_0668	828	TPR repeat-containing protein		74.6091	93.186	172.883	41.1194	0.320761	0.004556		0.891612	6.22903e-51		-2.07191	1.53084e-192	DOWN
LBU_0669	1191	elongation factor Tu	K02358	14170.2	11974.8	23816.8	21873.4	-0.242858	1.97164e-245		0.991979	0		-0.122797	4.76587e-270
LBU_0670	1320	trigger factor	K03545	2408.73	1948.41	4294.03	1500.27	-0.30598	7.14949e-72		1.14004	0	UP	-1.51711	0	DOWN
LBU_0671	1254	ATP-dependent Clp protease ATP-binding subunit	K03544	453.349	695.039	430.601	547.737	0.616474	1.14901e-71		-0.690743	8.61041e-195		0.347132	2.30023e-48
LBU_0672	603	GTP-binding protein	K03978	1195.66	1377.37	762.779	911.197	0.20411	8.31014e-10		-0.852584	1.07129e-266		0.256498	1.29052e-22
LBU_0673	636	triacylglycerol lipase		104.51	180.815	42.7356	109.284	0.790877	1.04275e-15		-2.081	1.8876e-144	DOWN	1.35457	2.14618e-52	UP
LBU_0674	837	beta-carotene 15,15-monooxygenase		56.9901	136.579	23.2073	83.4894	1.26095	3.34306e-32	UP	-2.55708	2.32908e-183	DOWN	1.84701	1.15116e-81	UP
LBU_0675	663	nitroreductase		271.275	329.935	155.017	224.562	0.282427	1.90991e-05		-1.08976	1.07651e-106	DOWN	0.534686	4.50452e-24
LBU_0676	1656	ABC-type oligopeptide transport system substrate-binding protein	K15580	421.683	661.772	230.482	154.936	0.650174	1.49102e-98		-1.52168	0	DOWN	-0.572981	4.58119e-67
LBU_0677	378	hypothetical protein		33.0997	30.0621	34.3224	21.1493	-0.138869	0.63498		0.191202	0.286829		-0.698542	0.00017634
LBU_0678	666	D-lactate dehydrogenase		50.4882	110.564	40.9194	18.9234	1.13086	4.53648e-18	UP	-1.43402	5.4643e-56	DOWN	-1.11262	4.07459e-16	DOWN
LBU_0679	957	thymidylate synthase	K00560	272.099	210.883	123.602	367.854	-0.367688	1.81616e-09		-0.770748	8.48322e-56		1.57344	0	UP
LBU_0680	489	dihydrofolate reductase	K00287	371	622.552	297.33	550.272	0.746772	8.5935e-36		-1.06613	1.02624e-142	DOWN	0.888081	5.41175e-101
LBU_0681	2409	cation-transporting ATPase	K01552	289.55	415.435	186.57	371.211	0.520809	6.16014e-61		-1.15491	0	DOWN	0.992524	0
LBU_0682	861	ABC-type metal ion transport system substrate-binding protein	K02073	570.364	369.148	1123.64	1183.13	-0.627682	2.93103e-42		1.60591	0	UP	0.0744256	7.78739e-05
LBU_0683	1056	ABC-type transport system ATP-binding protein	K02071	445.047	251.804	789.52	809.061	-0.821654	4.54689e-64		1.64867	0	UP	0.0352722	0.0888291
LBU_0684	714	ABC-type transport system permease protein	K02072	166.472	136.712	324.737	247.907	-0.284139	0.0016537		1.24813	6.76243e-140	UP	-0.389472	4.12214e-21
LBU_0685	1398	fumarate reductase flavoprotein subunit	K00244	610.817	525.419	846.996	771.186	-0.217271	3.68683e-11		0.688887	7.82024e-263		-0.135276	1.11745e-14
LBU_0686	1641	phosphoenolpyruvate carboxykinase	K01610	17.6315	8.24043	17.0488	5.33019	-1.09736	1.43684e-07	DOWN	1.04888	3.73287e-14	UP	-1.67742	1.35141e-29	DOWN
LBU_0687	453	conserved hypothetical protein		346.971	52.4275	30.0799	13.7029	-2.72642	1.27054e-120	DOWN	-0.801528	2.88105e-08		-1.13431	5.71971e-09	DOWN
LBU_0688	792	transposase		25.671	38.8826	22.1466	10.4502	0.598984	0.00138522		-0.812043	1.58389e-10		-1.08355	1.82494e-10	DOWN
LBU_0689	399	methionine synthase		7.83939	41.8655	22.3433	0.235719	2.41695	1.99614e-12	UP	-0.905915	2.44748e-07		-6.56663	1.05187e-26	DOWN
LBU_0690	1254	aminotransferase	K05825	129.083	155.228	113.112	92.027	0.266097	0.000144153		-0.456639	4.9904e-22		-0.297626	1.20154e-08
LBU_0691	915	LysR family transcriptional regulator	K03576	96.5723	234.473	143.137	62.5985	1.27974	1.32737e-60	UP	-0.71202	8.79139e-52		-1.1932	3.70277e-80	DOWN
LBU_0692	1698	putative arginyl-tRNA synthetase	K01887	756.65	659.925	1237.49	799.387	-0.197324	1.25591e-13		0.907042	0		-0.630451	0
LBU_0693	474	arginine repressor	K03402	216.117	113.875	374.784	300.212	-0.924365	4.80556e-18		1.71861	3.12391e-172	UP	-0.320076	7.58013e-12
LBU_0694	1200	pantothenate metabolism flavoprotein Dfp	K13038	180.507	107.858	283.999	211.303	-0.742916	1.22731e-25		1.39675	2.81249e-243	UP	-0.426571	1.18702e-35
LBU_0695	1074	amidohydrolase family protein		143.436	187.487	81.8602	36.8677	0.386385	3.17593e-08		-1.19556	7.79592e-114	DOWN	-1.1508	2.27688e-51	DOWN
LBU_0696	951	D-isomer specific 2-hydroxyacid dehydrogenase	K00058	227.769	294.423	112.949	33.7242	0.370319	3.30128e-10		-1.38221	4.71151e-197	DOWN	-1.74382	2.60517e-115	DOWN
LBU_0697	1770	ATP-dependent DNA helicase RecQ	K03654	71.571	102.143	62.1605	37.9928	0.513143	8.41076e-12		-0.716519	2.35002e-44		-0.710274	3.34359e-29
LBU_0698	939	inosine-uridine preferring nucleoside hydrolase family protein	K01239	64.124	62.6867	114.161	166.269	-0.0327039	0.806396		0.864841	1.11728e-36		0.542444	8.43364e-26
LBU_0699	1803	excinuclease ABC C subunit	K03703	81.9712	231.618	117.423	93.0609	1.49856	6.97482e-148	UP	-0.980039	4.01392e-170		-0.335464	5.22269e-15
LBU_0700	1155	putative GTP-binding protein	K03979	182.8	251.472	285.212	236.799	0.460131	4.03608e-15		0.181635	1.87085e-07		-0.26837	2.85474e-15
LBU_0701	177	hypothetical protein		547.827	421.155	446.344	279.499	-0.37937	0.000177237		0.0838032	0.240196		-0.675311	1.09355e-19
LBU_0702	1944	acyltransferase		195.093	262.634	334.1	199.619	0.428897	1.2562e-22		0.347223	1.30024e-42		-0.743033	2.86907e-178
LBU_0703	930	putative metallo-beta-lactamase superfamily	K00784	295.975	336.384	386.792	227.747	0.184632	0.000723391		0.201451	1.66381e-09		-0.764123	2.6943e-104
LBU_0704	690	short-chain dehydrogenase/reductase	K07124	358.124	319.495	330.99	338.996	-0.164665	0.00748909		0.0509958	0.221444		0.0344795	0.390603
LBU_0705	192	50S ribosomal protein L32	K02911	1401.05	744.545	1518.3	579.497	-0.912074	3.21298e-44		1.02802	6.3838e-129	UP	-1.38958	3.47102e-223	DOWN
LBU_0706	1566	putative 2,3-cyclic-nucleotide 2-phosphodiesterase		269.648	262.681	506.015	137.835	-0.0377672	0.432654		0.94587	5.80767e-303		-1.87624	0	DOWN
LBU_0707	1917	putative helicase		34.6731	47.8369	18.5264	34.785	0.464308	1.03664e-05		-1.36854	1.05883e-64	DOWN	0.908887	3.67565e-27
LBU_0708	438	membrane protein		53.5602	99.1062	26.1456	28.9886	0.887813	6.35714e-08		-1.92241	2.99113e-50	DOWN	0.148918	0.396824
LBU_0709	564	hypothetical protein		440.903	794.839	142.132	192.106	0.850201	9.09991e-65		-2.48343	0	DOWN	0.434672	1.07519e-12
LBU_0710	243	putative GntR family transcription regulator		904.264	942.281	167.628	209.004	0.0594122	0.362618		-2.4909	0	DOWN	0.318272	0.000307703
LBU_0711	327	putative GntR family transcription regulator		325.227	446.547	44.5517	101.53	0.457364	3.64948e-08		-3.32526	2.48981e-302	DOWN	1.18836	2.56115e-21	UP
LBU_0712	540	glutamate 5-kinase	K00931	13.033	37.4574	14.2275	2.26421	1.52308	1.36418e-08	UP	-1.39657	6.83404e-16	DOWN	-2.6516	3.18909e-15	DOWN
LBU_0713	1224	transposase		88.8032	44.7484	24.1007	11.1418	-0.988777	3.55301e-21		-0.892762	1.77077e-20		-1.11309	2.42793e-17	DOWN
LBU_0714	201	membrane protein		579.676	369.172	203.376	125.403	-0.650955	1.10274e-11		-0.860145	1.21719e-25		-0.697579	2.03795e-11
LBU_0715	3495	DNA polymerase III alpha subunit	K02337	20.5843	62.3935	19.1205	17.734	1.59985	1.42958e-85	UP	-1.70627	6.67232e-209	DOWN	-0.108606	0.149641
LBU_0716	960	6-phosphofructokinase	K00850	5513.77	2210.2	13730.5	12862.1	-1.31886	0	DOWN	2.63514	0	UP	-0.0942593	9.69193e-75
LBU_0717	1770	pyruvate kinase	K00873	6151.13	2837.79	10295.8	10008.8	-1.11608	0	DOWN	1.85922	0	UP	-0.0407891	6.36706e-21
LBU_0718	345	putative ATP-binding component of a transport system		49.8654	46.7714	67.8578	56.1586	-0.0924101	0.709034		0.536886	0.00011866		-0.273007	0.0357564
LBU_0719	516	acyltransferase		25.7629	8.36846	59.6974	23.6953	-1.62226	1.5457e-06	DOWN	2.83463	2.59668e-56	UP	-1.33307	1.64926e-23	DOWN
LBU_0720	879	RNA-binding protein	K00243	234.861	215.118	155.679	154.292	-0.12668	0.0611901		-0.466554	3.03337e-22		-0.0129049	0.807689
LBU_0721	897	site-specific recombinase	K04763	191.79	484.31	229.236	204.775	1.3364	1.32605e-129	UP	-1.0791	6.36037e-207	DOWN	-0.162791	0.000133293
LBU_0722	354	reductase	K02859	214.271	569.137	300.565	240.709	1.40934	7.42137e-66	UP	-0.921098	6.13441e-75		-0.320386	1.24039e-07
LBU_0723	735	segregation and condensation protein A	K05896	167.035	270.405	178.685	111.071	0.694968	3.52839e-21		-0.597705	1.10819e-35		-0.685933	1.34775e-32
LBU_0724	603	conserved hypothetical protein	K06024	245.098	610.575	281.745	225.538	1.31681	1.34439e-107	UP	-1.11578	2.61645e-185	DOWN	-0.321022	1.9025e-11
LBU_0725	720	ribosomal large subunit pseudouridine synthase B	K06178	616.895	959.741	510.579	316.25	0.63762	1.46208e-60		-0.910511	3.99179e-248		-0.691069	1.20472e-89
LBU_0726	705	membrane protein		37.7125	25.6283	28.375	23.0794	-0.557306	0.00550351		0.146884	0.30648		-0.298013	0.0349013
LBU_0727	396	putative N-acetylmuramidase		509.471	581.661	362.398	327.282	0.191178	0.00276895		-0.682603	1.26058e-51		-0.147042	0.00402623
LBU_0728	678	cytidylate kinase	K00945	77.2753	164.251	132.131	73.1053	1.08782	4.2134e-25	UP	-0.313932	3.10239e-07		-0.853921	1.62919e-32
LBU_0729	1206	30S ribosomal protein S1	K02945	5149.65	5903.36	11972.2	6142.08	0.197061	1.25404e-69		1.02009	0	UP	-0.962894	0
LBU_0730	1308	GTPase family protein	K03977	312.074	355.5	425.347	477.091	0.187959	2.49207e-05		0.258791	1.09039e-21		0.165624	9.03602e-12
LBU_0731	243	nucleoid DNA-binding protein		1383.75	472.309	1199.05	765.576	-1.55078	1.94538e-125	DOWN	1.34408	1.73485e-196	UP	-0.64727	9.54233e-64
LBU_0732	1254	peptide-binding protein		76.7013	123.784	74.5604	61.5013	0.690502	1.17814e-16		-0.731344	1.19194e-39		-0.277793	1.57757e-05
LBU_0733	2862	putative membrane protein		14.7543	22.9493	23.1216	25.2711	0.637313	6.36032e-07		0.0107881	0.891246		0.128251	0.0766105
LBU_0734	936	MarR family transcriptional regulator		555.573	1241	1056.99	760.555	1.15945	6.2004e-276	UP	-0.231534	1.44682e-35		-0.474844	2.96869e-122
LBU_0735	654	LysR family transcriptional regulator		15.5439	57.3387	21.3893	14.0934	1.88316	1.51363e-19	UP	-1.42262	5.92684e-29	DOWN	-0.601864	0.000658074
LBU_0736	384	hypothetical protein		20.364	49.1234	20.7624	9.55216	1.27039	1.89723e-06	UP	-1.24244	1.10633e-12	DOWN	-1.12007	1.10889e-05	DOWN
LBU_0737	2436	hypothetical protein		124.873	220.226	128.387	111.774	0.818525	1.82119e-72		-0.778489	4.0683e-148		-0.199914	7.33763e-09
LBU_0738	402	hypothetical protein		284.002	588.244	229.519	237.47	1.05051	5.28341e-49	UP	-1.3578	2.83342e-162	DOWN	0.04913	0.436379
LBU_0739	396	argininosuccinate lyase		252.761	355.252	146.424	118.99	0.49107	7.72241e-09		-1.2787	9.09306e-89	DOWN	-0.299307	0.000274153
LBU_0740	867	argininosuccinate lyase	K01755	444.655	493.335	215.683	127.03	0.149881	0.00125944		-1.19365	2.70346e-239	DOWN	-0.763747	6.35223e-55
LBU_0741	615	putative GTP pyrophosphokinase family protein		619.226	524.198	215.789	280.78	-0.240353	1.2814e-06		-1.28049	1.1436e-201	DOWN	0.379817	2.07105e-15
LBU_0742	669	putative two-component system response regulator	K07774	196.372	198.564	134.017	132.01	0.0160162	0.858936		-0.567187	2.67608e-22		-0.0217657	0.741658
LBU_0743	1260	putative two-component system sensor histidine kinase		132.812	121.301	67.9353	44.5627	-0.130802	0.0827979		-0.836354	7.62e-49		-0.608323	7.35887e-18
LBU_0744	2010	csn1 family CRISPR-associated protein		158.73	170.17	288.44	175.704	0.100397	0.0548178		0.761299	6.23317e-154		-0.715124	4.23593e-149
LBU_0745	216	csn1 family CRISPR-associated protein		83.2663	147.304	325.152	234.695	0.822995	1.51593e-05		1.14231	5.08714e-38	UP	-0.470329	7.44959e-10
LBU_0746	1890	csn1 family CRISPR-associated protein		227.974	157.045	311.969	169.741	-0.537695	1.59895e-28		0.99023	1.3261e-243		-0.878065	2.53724e-215
LBU_0747	711	CRISPR-associated protein		107.783	84.8665	122.532	33.7317	-0.344867	0.00242635		0.529896	1.56119e-13		-1.86099	1.89775e-102	DOWN
LBU_0748	1101	Acetyl-CoA acetyltransferase	K00626	137.077	137.683	272.803	194.255	0.0063603	0.940999		0.986508	3.71514e-124		-0.489909	2.44712e-40
LBU_0749	1212	hydroxymethylglutaryl-CoA reductase	K00054	547.128	429.318	617.692	573.003	-0.349829	2.97616e-20		0.524839	4.06079e-103		-0.108343	8.80256e-07
LBU_0750	1164	hydroxymethylglutaryl-CoA synthase	K01641	461.529	424.08	553.373	591.057	-0.122084	0.00314797		0.383915	1.07153e-50		0.0950441	3.5575e-05
LBU_0751	1359	membrane protein		20.7147	18.0612	43.0931	104.848	-0.197763	0.296667		1.25457	7.86504e-37	UP	1.28277	2.33343e-97	UP
LBU_0752	534	transcriptional regulator	K03976	80.541	76.8205	76.9587	64.1104	-0.0682303	0.661403		0.00259264	0.979262		-0.263528	0.00692631
LBU_0753	945	ribosomal protein L11 methyltransferase	K02687	125.779	182.297	96.7162	166.805	0.535401	4.12909e-12		-0.914459	1.48384e-63		0.786337	7.13792e-49
LBU_0754	2217	GTP pyrophosphokinase	K00951	759.758	1160.03	614.459	551.5	0.610548	1.67103e-205		-0.916772	0		-0.155955	1.48618e-21
LBU_0755	498	D-tyrosyl-tRNA deacylase	K07560	657.93	931.44	591.189	455.718	0.501528	3.98023e-27		-0.655843	1.89666e-95		-0.37548	9.12721e-25
LBU_0756	1287	histidyl-tRNA synthetase	K01892	234.533	350.793	524.196	186.058	0.58083	4.38671e-34		0.579485	5.09487e-111		-1.49436	0	DOWN
LBU_0757	1845	aspartyl-tRNA synthetase	K01876	316.606	349.281	712.383	219.71	0.141697	0.000167799		1.02826	0	UP	-1.69705	0	DOWN
LBU_0758	621	hypothetical protein		148.589	365.425	114.03	94.6578	1.29825	2.00612e-65	UP	-1.68016	1.122e-212	DOWN	-0.26862	0.000285839
LBU_0759	1776	membrane protein		184.487	183.761	54.1965	101.625	-0.00569201	0.920238		-1.76156	0	DOWN	0.906982	1.12285e-70
LBU_0760	1074	membrane protein		150.717	216.689	122.756	105.611	0.523787	2.46077e-15		-0.819827	4.1347e-71		-0.217033	5.26011e-05
LBU_0761	960	3-oxoacyl-(acyl-carrier-protein) synthase III	K00648	79.8271	15.9799	237.975	96.7952	-2.32062	7.18653e-50	DOWN	3.89648	0	UP	-1.2978	5.63073e-158	DOWN
LBU_0762	246	putative acyl carrier protein	K02078	524.498	67.9037	786.964	351.739	-2.94938	2.06654e-107	DOWN	3.53473	0	UP	-1.16179	6.66106e-113	DOWN
LBU_0763	945	malonyl CoA-(acyl-carrier-protein) transacylase	K00645	114.194	15.8728	318.834	109.279	-2.84686	5.27246e-87	DOWN	4.32818	0	UP	-1.54478	7.99369e-270	DOWN
LBU_0764	723	3-oxoacyl-(acyl-carrier-protein) reductase	K00059	167.644	49.8233	392.974	126.573	-1.75051	1.52103e-54	DOWN	2.97954	0	UP	-1.63446	4.47126e-276	DOWN
LBU_0765	1221	3-oxoacyl-(acyl-carrier-protein) synthase II	K09458	230.559	50.7215	440.814	169.925	-2.18447	8.07029e-167	DOWN	3.1195	0	UP	-1.37527	0	DOWN
LBU_0766	483	acetyl-CoA carboxylase biotin carboxyl carrier subunit	K02160	199.138	25.6443	422.723	164.932	-2.95706	1.23385e-80	DOWN	4.043	0	UP	-1.35784	1.97372e-151	DOWN
LBU_0767	444	beta-hydroxyacyl-(acyl-carrier-protein) dehydratase FabZ	K02372	52.8364	20.2188	148.551	65.0315	-1.38584	1.21362e-08	DOWN	2.87718	1.83162e-120	UP	-1.19175	4.59607e-41	DOWN
LBU_0768	1383	acetyl-CoA carboxylase, biotin carboxylase subunit	K01961	111.388	30.0726	230.803	93.508	-1.88908	2.18307e-76	DOWN	2.94014	0	UP	-1.3035	1.41699e-221	DOWN
LBU_0769	849	acetyl-CoA carboxylase, carboxyl transferase subunit beta	K01963	46.053	5.8892	92.7978	46.1952	-2.96715	1.08326e-33	DOWN	3.97795	7.44423e-187	UP	-1.00635	1.96037e-37	DOWN
LBU_0770	768	putative acetyl-CoA carboxylase alpha subunit	K01962	68.2196	15.9799	138.825	42.4948	-2.09393	1.46822e-30	DOWN	3.11894	3.88095e-209	UP	-1.70791	3.23238e-111	DOWN
LBU_0771	765	enoyl-(acyl-carrier-protein) reductase	K00208	87.9088	12.4775	120.989	42.6615	-2.81667	3.71278e-54	DOWN	3.27747	6.27377e-190	UP	-1.50387	8.78668e-81	DOWN
LBU_0772	666	biotin-[acetylCoA carboxylase] holoenzyme synthetase and biotin operon repressor	K03524	16.438	0.853114	57.2437	10.7327	-4.26815	2.84855e-13	DOWN	6.06823	9.71262e-103	UP	-2.41511	6.2058e-63	DOWN
LBU_0773	621	hypothetical protein		370.212	301.562	280.465	248.988	-0.295897	4.56009e-06		-0.104637	0.0230122		-0.171744	0.000214598
LBU_0774	399	hypothetical protein		3.9197	21.0751	7.62944	8.25018	2.42673	6.49557e-07	UP	-1.46589	7.44881e-08	DOWN	0.112848	0.746359
LBU_0775	315	polysaccharide deacetylase		24.8247	13.3476	6.67273	8.95733	-0.8952	0.023257		-1.00023	0.00519616		0.424792	0.275755
LBU_0776	786	glycoside hydrolase		4.97442	18.65	4.79509	6.70091	1.90657	1.50394e-08	UP	-1.95954	2.0953e-18	DOWN	0.482798	0.090666
LBU_0777	942	alcohol-acetaldehyde dehydrogenase	K04072	4.15063	7.84104	5.77067	2.39623	0.917714	0.0243097		-0.442306	0.0727231		-1.26797	6.40252e-05	DOWN	RPKM<10	pseudogene
LBU_0778	270	alcohol dehydrogenase		2.89622	1.26261	1.61066	1.39336	-1.19776	0.379671		0.351243	0.733103		-0.20908	0.830514		RPKM<10
LBU_0779	162	metal-dependent hydrolase		0	2.8058	0.89481	0.580568	0	0		-1.64876	0.180603		-0.624117	0.73251		RPKM<10	pseudogene
LBU_0780	1137	metal-dependent hydrolase	K07047	18.5694	4.29754	6.1834	1.90255	-2.11135	3.13083e-13	DOWN	0.524891	0.0401232		-1.70047	1.30914e-08	DOWN
LBU_0781	180	tRNA synthetase subunit beta		8.68866	15.1513	3.22132	0	0.802237	0.232906		-2.23372	4.5837e-05	DOWN	-3.62412	0.0138387
LBU_0782	303	arginine/ornithine antiporter		10.3232	24.0021	7.65462	0.931208	1.21727	0.00464684		-1.64876	4.96415e-08	DOWN	-3.03915	3.95001e-06	DOWN
LBU_0783	588	arginine/ornithine antiporter	K03758	26.5979	19.3257	8.50526	12.6362	-0.460798	0.0773746		-1.18409	1.13189e-07	DOWN	0.571139	0.0185236
LBU_0784	501	arginine/ornithine antiporter		59.3118	68.0448	31.3934	18.5851	0.198166	0.24841		-1.11602	1.39268e-18	DOWN	-0.756312	9.0109e-06
LBU_0785	1170	putative glucosyl transferase	K03429	153.722	210.759	239.307	153.699	0.455264	8.38597e-13		0.183269	1.27963e-06		-0.638756	6.29252e-60
LBU_0786	1050	glycosyl transferase	K13678	68.5163	97.4013	115.829	73.4501	0.507494	4.13731e-07		0.249989	1.72627e-05		-0.657164	3.37098e-28
LBU_0787	1014	membrane protein	K07027	10.7966	13.56	40.3141	12.7072	0.328783	0.233243		1.57193	3.46494e-36	UP	-1.66564	3.83208e-42	DOWN
LBU_0788	2073	putative phosphoglycerol transferase		138.44	112.977	170.832	57.9829	-0.293233	3.65515e-07		0.596552	3.99207e-62		-1.55888	0	DOWN
LBU_0789	234	preprotein translocase SecG subunit		578.13	561.861	567.138	447.752	-0.0411807	0.637212		0.0134857	0.807952		-0.341	3.4697e-10
LBU_0790	2370	ribonuclease R	K12573	288.705	460.82	490.843	323.229	0.674606	9.37038e-105		0.0910576	6.11807e-07		-0.602704	2.85127e-220
LBU_0791	462	SsrA-binding protein	K03664	479.005	396.738	535.91	317.375	-0.271853	3.42014e-05		0.433804	2.95632e-25		-0.755804	6.04339e-71
LBU_0792	588	permease family protein		6350.26	11273.8	1505.8	2402.96	0.828088	0		-2.90437	0	DOWN	0.674284	0
LBU_0793	681	ABC-type transport system ATP-binding protein		2599.71	4531.54	640.503	1275.85	0.801653	0		-2.82273	0	DOWN	0.994179	0
LBU_0794	174	hypothetical protein		530.308	683.115	83.3099	149.726	0.365298	5.99174e-05		-3.03557	3.50506e-227	DOWN	0.845769	2.62218e-10
LBU_0795	204	conserved hypothetical protein		11.4997	0	6.03997	1.38312	0	0		4.43871	0.000207204	UP	-2.12662	0.00628773
LBU_0796	486	hypothetical protein		1.60901	25.486	6.56194	8.12795	3.98546	2.50304e-14	UP	-1.95751	9.3763e-16	DOWN	0.308769	0.340375
LBU_0797	489	putative PTS system IIA components	K02777	4.79742	26.9563	4.89126	2.6927	2.49029	2.16827e-10	UP	-2.46234	1.14586e-21	DOWN	-0.861156	0.0564114
LBU_0798	522	acetyltransferase	K02348	26.9648	55.0759	51.6522	12.7925	1.03034	6.49022e-07	UP	-0.092592	0.437293		-2.01353	3.18842e-36	DOWN
LBU_0799	780	ABC-type transport system ATP-binding protein	K09013	65.165	18.7935	97.1971	144.695	-1.79387	1.97859e-24	DOWN	2.37068	3.68753e-112	UP	0.574034	5.98295e-21
LBU_0800	1164	conserved hypothetical protein	K09015	22.1695	6.34559	55.356	76.6799	-1.80475	3.76991e-13	DOWN	3.12491	2.66166e-127	UP	0.470107	3.78752e-12
LBU_0801	1215	cysteine desulfurase	K11717	55.35	37.9718	86.737	100.245	-0.543654	1.29332e-05		1.19172	4.54051e-60	UP	0.208808	0.000184433
LBU_0802	441	putative NifU protein	K04488	39.0103	38.136	93.3525	105.995	-0.0327039	0.895716		1.29154	1.68532e-27	UP	0.183238	0.0432922
LBU_0803	1428	conserved hypothetical protein	K09014	41.0703	10.2653	62.7852	71	-2.00032	3.53808e-32	DOWN	2.61265	1.33525e-147	UP	0.177394	0.0037163
LBU_0804	174	hypothetical protein		4.49413	0	0.833099	1.08106	0	0		0	0		0.375883	0.805546		RPKM<10
LBU_0805	510	ABC-type transport system ATP-binding and permease protein	K06148	0	5.34752	8.95337	10.1429	2.80224	0.0024002		0.74356	0.0239575		0.179963	0.51732
LBU_0806	876	putative rRNA methylase	K00599	15.1754	23.6091	34.5023	15.8901	0.637606	0.00574001		0.547352	8.30701e-06		-1.11857	7.28853e-18	DOWN
LBU_0807	1275	asparagine synthetase B	K01953	2.45327	5.52577	6.53738	3.83585	1.17147	0.00696142		0.242536	0.283113		-0.769168	0.0011054		RPKM<10	pseudogene
LBU_0808	618	ABC-type oligopeptide transport system substrate-binding protein		36.6948	83.8471	85.2633	27.546	1.19218	3.84371e-14	UP	0.0241643	0.784507		-1.63008	2.74678e-52	DOWN
LBU_0809	636	ABC-type oligopeptide transport system substrate-binding protein		19.6724	53.78	36.5817	13.3092	1.45089	8.95798e-13	UP	-0.555947	1.49008e-06		-1.45869	1.49269e-20	DOWN
LBU_0810	189	hypothetical protein		678.543	481.595	217.822	291.113	-0.494619	2.92053e-08		-1.14467	5.84361e-49	DOWN	0.418428	1.08e-06
LBU_0811	696	conserved hypothetical protein		180.889	374.048	179.012	226.076	1.04812	1.31035e-53	UP	-1.06317	9.62113e-122	DOWN	0.336751	1.39282e-11
LBU_0812	366	Putative sensory box/GGDEF domain/EAL domain protein		292.708	1064.63	322.396	305.541	1.86281	1.43761e-187	UP	-1.72344	0	DOWN	-0.0774692	0.169955
LBU_0813	279	Putative sensory box/GGDEF domain/EAL domain protein		437.236	661.444	209.386	166.192	0.597208	2.10151e-15		-1.65946	2.74433e-170	DOWN	-0.333309	5.09233e-05
LBU_0814	885	ABC-type phosphate transport system substrate-binding protein	K02040	307.49	474.698	108.842	61.1072	0.62647	3.1761e-36		-2.12477	0	DOWN	-0.832825	1.87247e-33
LBU_0815	909	ABC-type phosphate transport system permease protein	K02037	153.127	255.772	58.4462	31.868	0.740131	3.01366e-27		-2.12968	7.31521e-299	DOWN	-0.875	1.15329e-20
LBU_0816	876	ABC-type phosphate transport system permease protein	K02038	213.348	319.501	92.0061	41.8725	0.582608	9.34982e-22		-1.79602	2.54834e-287	DOWN	-1.13573	2.91071e-46	DOWN
LBU_0817	759	ABC-type phosphate transport system ATP-binding protein	K02036	573.864	1461.83	225.556	124.164	1.349	0	UP	-2.69622	0	DOWN	-0.861244	1.27854e-61
LBU_0818	639	phosphate transport system regulatory protein PhoU	K02039	1024.28	1230.6	252.147	105.533	0.264747	1.46127e-14		-2.28702	0	DOWN	-1.25658	1.85382e-106	DOWN
LBU_0819	678	OmpR family DNA-binding response regulator	K07657	450.965	740.302	160.139	105.982	0.715101	5.3426e-54		-2.20879	0	DOWN	-0.59551	1.72855e-21
LBU_0820	1659	sensor histidine kinase	K07636	135.279	276.45	48.0576	42.3489	1.03108	5.76647e-91	UP	-2.52418	0	DOWN	-0.182441	0.00831346
LBU_0821	546	choloylglycine hydrolase		1.4322	8.94926	4.51338	2.58385	2.64354	7.29996e-05	UP	-0.987559	0.0028535		-0.80469	0.0680351		RPKM<10
LBU_0822	477	ABC-type transport system ATP-binding protein		3.27874	0.952913	1.97534	2.36609	-1.78273	0.0862111		1.05168	0.172477		0.260406	0.6693		RPKM<10	pseudogene
LBU_0823	657	NUDIX family hydrolase		80.9355	173.306	158.308	231.05	1.09848	5.05891e-26	UP	-0.130589	0.027689		0.545473	2.2862e-25
LBU_0824	342	hypothetical protein		192.065	181.417	189.252	172.154	-0.0822859	0.507037		0.061002	0.439953		-0.136615	0.0747926
LBU_0825	708	putative glycosyl hydrolase		47.4931	42.3723	98.9941	75.8527	-0.164596	0.342314		1.22422	3.55168e-42	UP	-0.384142	3.66397e-07
LBU_0826	552	NUDIX family hydrolase	K01554	101.997	30.4673	156.12	198.497	-1.7432	6.39012e-26	DOWN	2.35732	1.97331e-126	UP	0.346464	7.33671e-09
LBU_0827	780	C4-dicarboxylate anaerobic carrier family protein		86.2182	56.8174	231.749	29.0597	-0.60166	1.72335e-06		2.02816	9.39979e-219	UP	-2.99547	0	DOWN
LBU_0828	768	ABC-type cobalt transporter system ATP-binding protein		246.405	73.981	590.407	62.3339	-1.7358	1.97748e-83	DOWN	2.99648	0	UP	-3.24362	0	DOWN
LBU_0829	819	ABC-type cobalt transporter system ATP-binding protein		84.977	14.0136	269.122	32.9584	-2.60025	1.48182e-51	DOWN	4.26336	0	UP	-3.02954	0	DOWN
LBU_0830	777	ABC-type cobalt transport system permease protein		87.5575	35.977	267.997	32.198	-1.28315	3.19959e-20	DOWN	2.89707	0	UP	-3.05718	0	DOWN
LBU_0831	636	membrane protein	K16923	82.3783	42.1664	274.648	51.4624	-0.966172	1.59842e-10		2.70342	1.41871e-296	UP	-2.41599	8.69456e-283	DOWN
LBU_0832	1527	C-di-GMP-specific phosphodiesterase	K14051	18.9478	14.3625	18.7963	15.4598	-0.399722	0.0341263		0.388142	0.00160551		-0.28193	0.0162626
LBU_0833	1029	signal transduction diguanylate cyclase	K00936	26.5979	22.1969	43.3892	11.6994	-0.260957	0.175649		0.966978	3.45963e-19		-1.8909	2.13125e-54	DOWN
LBU_0834	582	hypothetical protein		110.176	76.7328	97.2622	25.0482	-0.521892	4.13268e-05		0.342036	7.95674e-05		-1.95717	1.06971e-71	DOWN
LBU_0835	804	HAD family hydrolase	K07024	35.9866	22.0485	27.6757	47.4939	-0.706777	0.000317589		0.327935	0.0181349		0.779124	9.49614e-13
LBU_0836	156	transcriptional regulator		35.0888	32.0508	38.0983	38.5854	-0.130649	0.769772		0.249363	0.353515		0.0183307	0.940895
LBU_0837	279	MarR family transcriptional regulator		50.4503	72.9055	22.6012	17.8665	0.531165	0.02066		-1.68963	1.18635e-20	DOWN	-0.33914	0.184677
LBU_0838	309	ABC-type transport system ATP-binding protein		0	0	1.8765	0.913126	0	0		3.35124	0.0209859		-1.03915	0.277066		RPKM<10	pseudogene
LBU_0839	270	ABC-type transport system ATP-binding and permease protein		0	0	3.7582	0.696681	0	0		4.1586	0.000935866	UP	-2.43147	0.00716478		RPKM<10	pseudogene
LBU_0840	390	ABC-type transport system ATP-binding and permease protein		0	0	2.0443	0.241159	0	0		3.81067	0.00437819		-3.08355	0.00693124		RPKM<10	pseudogene
LBU_0841	999	ABC-type multidrug transport system ATP-binding and permease protein	K02021	5.47934	5.80118	1.95891	3.57755	0.0823448	0.850951		-1.5663	2.81737e-06	DOWN	0.868923	0.0183047		RPKM<10	pseudogene
LBU_0842	639	conserved hypothetical protein	K08591	123.599	406.347	119.211	119.515	1.71704	3.07838e-112	UP	-1.76919	3.16959e-261	DOWN	0.0036717	0.957265
LBU_0843	1932	DNA topoisomerase IV B subunit	K02622	140.044	217.388	144.809	89.2812	0.634395	5.26576e-37		-0.586121	3.87754e-71		-0.697724	9.7108e-70
LBU_0844	2484	DNA topoisomerase IV A subunit	K02621	119.312	166.244	150.124	81.5572	0.478563	2.06611e-22		-0.147145	2.02357e-06		-0.88027	2.49722e-137
LBU_0845	936	manganese-dependent inorganic pyrophosphatase	K15986	1934.06	1942.84	1086.27	1335.52	0.00653267	0.785969		-0.83879	0		0.298023	1.87457e-65
LBU_0846	1026	isopentenyl-diphosphate delta-isomerase	K01823	25.9135	54.8238	48.3198	12.5586	1.0811	3.27699e-13	UP	-0.182189	0.0324183		-1.94394	1.94016e-62	DOWN
LBU_0847	1083	phosphomevalonate kinase	K00938	99.6428	133.466	252.909	182.025	0.421633	3.86912e-07		0.922149	1.79611e-101		-0.474483	6.71792e-35
LBU_0848	960	mevalonate diphosphate decarboxylase	K01597	89.6018	95.8794	203.547	117.173	0.0976928	0.345405		1.08607	5.62473e-95	UP	-0.79672	1.48755e-61
LBU_0849	912	mevalonate kinase	K00869	90.888	68.5298	157.437	106.427	-0.407358	0.000213149		1.19997	4.0344e-82	UP	-0.564903	1.50338e-25
LBU_0850	3540	ATP-dependent nuclease B subunit	K16899	70.9083	110.425	82.7169	101.279	0.639038	5.69906e-35		-0.416811	2.59173e-36		0.292076	3.8828e-19
LBU_0851	3684	ATP-dependent nuclease A subunit	K16898	127.783	215.672	125.443	143.376	0.755144	5.30648e-93		-0.781811	3.63642e-220		0.192774	3.50018e-13
LBU_0852	2793	ATP-dependent DNA helicase DinG	K03722	142.509	203.916	125.626	120.217	0.516923	8.56069e-35		-0.698839	1.78985e-130		-0.0634983	0.0502361
LBU_0853	495	hypothetical protein		349.126	592.967	351.124	328.517	0.764204	6.46961e-36		-0.755973	8.20024e-78		-0.096011	0.0380705
LBU_0854	1299	asparaginyl-tRNA synthetase	K01893	279.321	330.232	438.449	206.567	0.241554	2.33917e-07		0.408928	1.99708e-50		-1.0858	2.49462e-295	DOWN
LBU_0855	615	DNA replication protein DnaD	K02086	39.4168	74.2784	64.2299	67.4422	0.91413	1.26062e-08		-0.209697	0.0272088		0.0704052	0.46503
LBU_0856	630	endonuclease III	K10773	52.132	162.877	52.1163	99.8743	1.64354	1.50172e-42	UP	-1.64397	3.42823e-94	DOWN	0.938378	4.75889e-27
LBU_0857	804	Cof-like hydrolase	K07024	72.9458	72.9298	37.6822	45.0373	-0.00031705	0.997868		-0.952625	3.68627e-24		0.257238	0.0133504
LBU_0858	405	putative esterase		34.7546	37.5977	16.6435	41.5687	0.113439	0.667343		-1.17569	9.75994e-10	DOWN	1.32054	2.5751e-13	UP
LBU_0859	330	putative esterase		52.132	37.1896	20.8654	28.7856	-0.48727	0.0504737		-0.833789	3.88966e-05		0.464239	0.0276784
LBU_0860	1002	D-lactate dehydrogenase	K03778	1057.47	1370.42	677.634	736.177	0.374008	9.72431e-46		-1.01604	0	DOWN	0.119547	7.37975e-08
LBU_0861	1929	Dipeptidyl aminopeptidases/acylaminoacyl-peptidases		72.1578	83.9449	101.825	71.9651	0.218287	0.00441483		0.278574	1.21972e-09		-0.500717	6.24411e-28
LBU_0862	2313	penicillin-binding protein 1A	K05366	197.101	247.805	295.778	227.709	0.330275	5.33361e-16		0.255308	1.07274e-25		-0.377324	4.56286e-56
LBU_0863	633	recombination protein RecU	K03700	242.129	315.233	397.665	424.497	0.380642	5.686e-08		0.335132	2.1002e-16		0.0942014	0.0110662
LBU_0864	561	hypothetical protein		111.512	110.799	23.6431	84.9989	-0.00925669	0.943374		-2.22845	9.18342e-86	DOWN	1.84602	3.45044e-56	UP
LBU_0865	465	cell division protein		1508.46	2081.35	1122.11	1600.3	0.46444	4.36528e-48		-0.891306	0		0.512129	8.99136e-106
LBU_0866	1125	DNA methylase	K07444	77.8504	130.2	109.847	41.4665	0.741956	9.81832e-18		-0.245238	3.5768e-06		-1.40548	3.8092e-97	DOWN
LBU_0867	975	putative 3,5-cyclic-nucleotide phosphodiesterase		36.8934	86.3625	70.2495	38.7784	1.22704	4.00928e-23	UP	-0.297916	2.37755e-05		-0.857236	2.26737e-25
LBU_0868	156	serine/threonine protein phosphatase		55.1396	13.8401	52.5013	22.9101	-1.99423	8.58834e-06	DOWN	1.92349	1.15064e-10	UP	-1.19637	2.61539e-06	DOWN
LBU_0869	1689	putative formate-tetrahydrofolate ligase	K01938	3725.17	2175.61	5028.35	25338.6	-0.775883	0		1.20866	0	UP	2.33318	0	UP
LBU_0870	453	putative prolipoprotein signal peptidase	K03101	2905.23	1790.31	4207.02	18196.7	-0.698443	7.99722e-134		1.23259	0	UP	2.1128	0	UP
LBU_0871	915	ribosomal large subunit pseudouridine synthase D	K06180	1183.65	526.446	1556.45	4963.38	-1.16889	1.07547e-260	DOWN	1.5639	0	UP	1.67306	0	UP
LBU_0872	1056	carbamoyl-phosphate synthetase small subunit		713.112	321.427	1025.49	2927.72	-1.14964	6.5854e-177	DOWN	1.67375	0	UP	1.51347	0	UP
LBU_0873	3192	carbamoyl-phosphate synthase large subunit		957.386	547.562	1438.69	3789.19	-0.806079	0		1.39367	0	UP	1.39713	0	UP
LBU_0874	282	ACT domain-containing protein	K07166	2434.67	1361.2	3011.76	8861.57	-0.838849	2.81488e-96		1.14573	0	UP	1.55695	0	UP
LBU_0875	1344	glycerol-3-phosphate dehydrogenase [nad(p)+ ]	K09157	837.253	446	1101.92	2529.54	-0.908621	1.50615e-179		1.3049	0	UP	1.19886	0	UP
LBU_0876	1692	conserved hypothetical protein		87.8109	169.982	87.9008	83.1015	0.952911	1.10798e-50		-0.951434	4.23834e-112		-0.0810025	0.106437
LBU_0877	882	conserved hypothetical protein		184.412	260.639	277.263	223.507	0.499115	5.33921e-14		0.0892064	0.0264178		-0.310939	5.08667e-15
LBU_0878	807	hypothetical protein		18.4109	45.2005	29.0098	7.10926	1.29578	1.33837e-11	UP	-0.639796	1.64752e-08		-2.02877	6.0433e-32	DOWN
LBU_0879	912	permeases of the drug/metabolite transporter (DMT) superfamily		11.1466	37.1307	30.7562	3.81571	1.736	4.93821e-16	UP	-0.271736	0.0147155		-3.01085	1.20486e-58	DOWN
LBU_0880	696	Phosphoglycerate dehydrogenase	K00058	29.2119	7.67362	40.8219	11.216	-1.92858	1.63307e-11	DOWN	2.41136	6.88248e-44	UP	-1.86379	1.60501e-34	DOWN
LBU_0881	492	conserved hypothetical protein		34.9666	18.4772	49.7929	23.1307	-0.920229	0.000498263		1.43019	1.39559e-19	UP	-1.10613	1.66209e-14	DOWN
LBU_0882	1077	phosphoserine aminotransferase	K00831	31.2211	17.4092	27.121	10.392	-0.842668	5.62775e-06		0.639557	4.53426e-07		-1.38394	1.33763e-23	DOWN
LBU_0883	624	phosphoglycerate mutase	K15634	137.849	95.0599	152.393	82.4462	-0.536179	1.07771e-06		0.680889	3.97297e-22		-0.886272	1.44261e-36
LBU_0884	219	ABC-type transport system permease protein		0	9.85873	18.8646	12.8838	2.4652	0.012112		0.936205	0.00882455		-0.550117	0.0914803
LBU_0885	519	nitroreductase		667.47	771.359	65.497	100.938	0.2087	1.4953e-05		-3.5579	0	DOWN	0.623972	6.15952e-12
LBU_0886	354	conserved hypothetical protein		64.0605	74.4725	58.3523	61.9043	0.217274	0.267614		-0.35192	0.00588571		0.0852508	0.520986
LBU_0887	159	conserved hypothetical protein		9.83622	120.067	71.1121	27.21	3.60959	4.60846e-20	UP	-0.755672	2.35825e-06		-1.38596	5.26109e-10	DOWN
LBU_0888	243	hypothetical protein		22.5262	130.937	48.3198	21.2875	2.5392	1.0469e-23	UP	-1.43819	3.47097e-25	DOWN	-1.18261	2.29754e-08	DOWN
LBU_0889	1077	putative integrase/recombinase		50.825	48.4293	30.0148	37.5509	-0.0696583	0.613515		-0.690208	4.66872e-13		0.323176	0.00110614
LBU_0890	1149	glycerate kinase	K00865	61.2517	85.8442	29.8371	41.0915	0.486973	1.72568e-06		-1.52461	2.17834e-81	DOWN	0.46173	7.47881e-07
LBU_0891	1170	hypothetical protein		161.743	209.884	57.5501	53.4569	0.375895	2.51231e-09		-1.86671	7.40308e-266	DOWN	-0.106442	0.156213
LBU_0892	579	TPR repeat-containing protein		213.39	96.1676	39.3068	15.1068	-1.14987	3.64892e-30	DOWN	-1.29077	1.29023e-36	DOWN	-1.37958	1.26052e-18	DOWN
LBU_0893	999	hypothetical protein		123.676	147.077	32.721	54.134	0.25	0.00196654		-2.16828	8.62799e-194	DOWN	0.726317	1.2541e-15
LBU_0894	561	conserved hypothetical protein		11.1512	22.0788	13.9533	8.88548	0.985459	0.00181715		-0.662054	0.000740528		-0.651084	0.00647595
LBU_0895	957	type I restriction-modification system restriction subunit	K01153	38.4044	36.9284	14.1627	10.3192	-0.0565437	0.737164		-1.38263	2.76165e-26	DOWN	-0.456766	0.00937927
LBU_0896	492	hypothetical protein		1106.21	379.245	1068.49	3965.29	-1.54443	5.08519e-201	DOWN	1.49437	0	UP	1.89186	0	UP
LBU_0897	819	membrane protein		1107.57	552.357	1631.54	6671.72	-1.00372	6.306e-171	DOWN	1.56257	0	UP	2.03182	0	UP
LBU_0898	1266	metal-dependent amidase/aminoacylase/carboxypeptidase	K01463	410.138	146.307	546.918	2595.2	-1.48711	1.67357e-181	DOWN	1.90232	0	UP	2.24645	0	UP
LBU_0899	1023	putative adenosine deaminase	K01488	242.314	80.0887	462.509	2825.51	-1.59721	7.61906e-97	DOWN	2.52981	0	UP	2.61096	0	UP
LBU_0900	1338	Xanthine/uracil/vitamin C permease	K06901	808.279	354.408	1330.64	8905.56	-1.18944	1.31854e-267	DOWN	1.90863	0	UP	2.74259	0	UP
LBU_0901	1782	adenine deaminase	K01486	1882.1	637.809	2432.14	13225.4	-1.56115	0	DOWN	1.93103	0	UP	2.44302	0	UP
LBU_0902	375	phosphoglycerate mutase family protein	K15634	22.9381	7.27263	18.5548	18.3088	-1.65719	9.15596e-05	DOWN	1.35124	4.3464e-06	UP	-0.0192552	0.933511
LBU_0903	702	hypothetical protein		1518.29	1390.17	186.052	302.253	-0.127189	1.25305e-05		-2.90148	0	DOWN	0.700051	1.43606e-53
LBU_0904	381	ABC-type oligopeptide transport system substrate-binding protein		270.922	277.675	40.1396	130.34	0.0355176	0.718825		-2.7903	2.47373e-186	DOWN	1.69918	2.81095e-52	UP
LBU_0905	1026	ABC-type oligopeptide transport system substrate-binding protein		55.6379	64.9025	11.0203	62.4263	0.222207	0.0667526		-2.55811	1.45422e-107	DOWN	2.50199	6.41223e-109	UP
LBU_0906	510	methylase involved in ubiquinone/menaquinone biosynthesis		3.06659	0.891254	3.83716	5.34805	-1.78273	0.0862111		2.10613	0.000895476	UP	0.478976	0.230002		RPKM<10
LBU_0907	288	hypothetical protein		2.71521	0.394565	0.251665	3.59226	-2.78273	0.1123		-0.648757	0.759382		3.83531	0.000751016	UP	RPKM<10
LBU_0908	2475	conserved hypothetical protein		11.0583	6.84105	7.96544	4.8261	-0.69284	0.000586382		0.219537	0.131866		-0.722895	1.72455e-06
LBU_0909	804	conserved hypothetical protein	K01658	12.6439	5.08813	7.66265	7.83767	-1.31324	0.000357597	DOWN	0.590709	0.0324581		0.032581	0.894211
LBU_0910	177	conserved hypothetical protein		8.83593	0.642005	15.9701	9.03324	-3.78273	0.00906044		4.63664	1.21188e-08	UP	-0.822057	0.0459751
LBU_0911	237	diguanylate cyclase		0	2.39736	3.05821	3.57159	0.539202	0.71327		0.351243	0.659224		0.22388	0.749407		RPKM<10	pseudogene
LBU_0912	156	diguanylate cyclase domain protein		15.0381	0.728428	0.929226	4.22028	-4.36769	0.000798227	DOWN	0.351243	0.843332		2.18324	0.0432984
LBU_0913	1290	Na+-driven multidrug efflux protein		8.4866	2.55458	4.94435	2.69762	-1.7321	5.00498e-06	DOWN	0.952693	0.000924696		-0.874096	0.00145372		RPKM<10
LBU_0914	432	MerR family transcriptional regulator		5.43041	1.05217	2.1811	1.08856	-2.36769	0.0106068		1.05168	0.172477		-1.00263	0.17656		RPKM<10	pseudogene
LBU_0915	276	MerR family transcriptional regulator		19.8328	4.94064	0.525215	3.40768	-2.00512	0.000388783	DOWN	-3.23372	0.000461577	DOWN	2.69781	0.00609152
LBU_0916	441	putative transcriptional regulator		0	0	0.821765	0	0	0		2.67317	0.10325		-2.94605	0.0772206		RPKM<10	pseudogene
LBU_0917	567	putative integrase/recombinase		84.1283	118.645	16.1066	23.8862	0.49599	6.13669e-05		-2.88093	5.44545e-123	DOWN	0.568528	0.00146396
LBU_0918	348	hypothetical protein		15.7295	1.30615	1.45792	1.08106	-3.59008	1.21992e-06	DOWN	0.158598	0.863576		-0.431472	0.644295
LBU_0919	516	ABC-type transport system permease protein		19.701	41.8423	13.2037	7.6554	1.08669	6.90731e-06	UP	-1.66402	2.15246e-21	DOWN	-0.786389	0.00268422
LBU_0920	465	membrane protein		11.7717	26.3926	8.57286	9.10181	1.16481	0.000357546	UP	-1.62229	2.27299e-12	DOWN	0.0863761	0.776889
LBU_0921	495	hypothetical protein		260.66	209.364	31.0418	41.0409	-0.316158	0.000271642		-2.75373	4.17743e-180	DOWN	0.40285	0.0045808
LBU_0922	399	putative arsenate reductase	K03741	113.671	138.412	27.7929	17.6789	0.284106	0.0337948		-2.31618	5.7278e-80	DOWN	-0.652686	0.00111915
LBU_0923	327	hypothetical protein		57.393	61.5088	19.2836	9.77911	0.0999174	0.662482		-1.67342	3.51068e-20	DOWN	-0.979598	0.000486503
LBU_0924	753	ABC-type transport system ATP-binding protein	K02003	10.3849	0.905457	12.8981	2.49806	-3.51969	7.78304e-09	DOWN	3.83237	6.8748e-24	UP	-2.36828	8.91219e-17	DOWN
LBU_0925	1875	ABC-type transport system permease protein	K02004	17.5163	13.8786	14.8438	8.22642	-0.335839	0.0560708		0.0970015	0.423456		-0.851528	4.95226e-11
LBU_0926	486	fumarate reductase (flavoprotein)		24.1352	71.314	9.54464	8.12795	1.56305	2.78008e-14	UP	-2.90142	1.29547e-64	DOWN	-0.2318	0.432922
LBU_0927	867	conserved hypothetical protein		36.0775	73.2663	19.3112	11.8243	1.02205	1.42604e-13	UP	-1.92371	7.61402e-73	DOWN	-0.707682	1.55978e-05
LBU_0928	558	ribosomal-protein-serine acetyltransferase	K03817	56.0559	121.577	112.097	69.612	1.11693	1.91376e-16	UP	-0.117128	0.129049		-0.687336	2.44086e-16
LBU_0929	537	N-acetylmuramoyl-L-alanine amidase		1047.01	862.948	522.879	1016.71	-0.278928	9.03964e-12		-0.722795	7.69424e-113		0.959355	2.89722e-231
LBU_0930	588	peptidyl-prolyl cis-trans isomerase	K03768	436.206	643.737	409.855	783.127	0.561462	3.62251e-27		-0.651358	2.90035e-77		0.934132	7.46206e-187
LBU_0931	1182	aromatic amino acid specific aminotransferase	K00841	117.098	54.9908	135.148	86.4133	-1.09046	5.54285e-31	DOWN	1.29728	8.24409e-103	UP	-0.645217	1.90539e-35
LBU_0932	780	dihydrodipicolinate reductase	K00215	125.317	108.973	182.686	125.644	-0.201615	0.0423235		0.745396	1.04943e-37		-0.540025	1.69956e-23
LBU_0933	930	dihydrodipicolinate synthase	K01714	173.213	98.4835	293.737	160.799	-0.81459	1.56957e-22		1.57657	1.71041e-233	UP	-0.869272	6.62019e-99
LBU_0934	1155	N-acetyldiaminopimelate deacetylase	K05823	48.7468	6.49342	123.121	23.0448	-2.90826	5.09562e-47	DOWN	4.24496	0	UP	-2.41757	1.07529e-230	DOWN
LBU_0935	714	2,3,4,5-tetrahydropyridine-2-carboxylate N-succinyltransferase	K00674	100.759	33.8995	177.849	56.1151	-1.57158	1.98822e-28	DOWN	2.39132	1.32525e-188	UP	-1.66419	1.82737e-127	DOWN
LBU_0936	1374	aspartate kinase	K00928	16.5047	8.43577	45.946	10.4046	-0.968281	2.82023e-05		2.44535	4.54998e-97	UP	-2.14272	1.80823e-89	DOWN
LBU_0937	987	diaminopimelate epimerase	K01778	12.6765	11.5132	47.1448	9.52908	-0.138869	0.63498		2.03382	9.29074e-58	UP	-2.30669	1.65579e-72	DOWN
LBU_0938	327	N-acetylmuramoyl-L-alanine amidase		655.237	315.536	244.924	497.296	-1.05421	8.98766e-45	DOWN	-0.365475	1.28216e-08		1.02177	1.65806e-77	UP
LBU_0939	558	ribosomal-protein-serine acetyltransferase	K03817	100.901	257.002	212.633	137.538	1.34885	2.62503e-44	UP	-0.273415	3.52315e-07		-0.628531	1.45316e-25
LBU_0940	867	conserved hypothetical protein		84.7821	158.46	36.8668	23.4316	0.902284	7.56503e-23		-2.10372	1.30679e-174	DOWN	-0.653865	2.31229e-08
LBU_0941	486	fumarate reductase (flavoprotein)		27.3532	36.7092	5.07059	3.28988	0.424432	0.0805917		-2.85592	1.5815e-33	DOWN	-0.624117	0.14598
LBU_0942	1875	ABC-type transport system permease protein	K02004	9.17523	6.06052	7.11267	4.01289	-0.598301	0.017755		0.230949	0.194065		-0.825751	1.03497e-05		RPKM<10
LBU_0943	753	ABC-type transport system ATP-binding protein	K02003	6.23091	0.452728	5.58276	0.624515	-3.78273	4.77424e-06	DOWN	3.62426	9.15101e-11	UP	-3.16017	2.13041e-10	DOWN	RPKM<10
LBU_0944	327	hypothetical protein		136.308	95.912	30.1444	21.8592	-0.507091	0.000923955		-1.66982	1.55145e-30	DOWN	-0.463653	0.0250808
LBU_0945	399	putative arsenate reductase	K03741	146.989	260.876	31.971	36.7722	0.827659	2.09754e-15		-3.02853	9.92993e-199	DOWN	0.201853	0.217747
LBU_0946	495	hypothetical protein		132.7	90.6783	18.3029	16.9104	-0.549334	1.35585e-05		-2.30868	4.71725e-65	DOWN	-0.114168	0.583456
LBU_0947	465	membrane protein		30.2702	57.184	17.4575	19.4172	0.917714	1.43535e-05		-1.71177	5.30729e-27	DOWN	0.15349	0.464053
LBU_0948	516	ABC-type transport system permease protein		21.2165	21.802	8.00647	4.19224	0.0392761	0.898246		-1.44522	7.06574e-10	DOWN	-0.933445	0.00692364
LBU_0949	348	hypothetical protein		22.4707	1.63268	2.29102	3.24317	-3.78273	3.0219e-09	DOWN	0.488746	0.525979		0.501414	0.424729
LBU_0950	567	putative integrase/recombinase		165.498	194.402	34.0028	50.4265	0.232225	0.0129355		-2.51532	1.17675e-173	DOWN	0.568528	3.30814e-06
LBU_0951	441	putative transcriptional regulator		0	0	0.493059	0	0	0		0	0		0	0		RPKM<10	pseudogene
LBU_0952	276	MerR family transcriptional regulator		19.8328	13.9985	0.787822	5.45229	-0.502618	0.266082		-4.15126	8.31687e-11	DOWN	2.79092	0.000389188	UP
LBU_0953	432	MerR family transcriptional regulator		9.05069	3.41957	5.03331	4.78969	-1.40421	0.0211352		0.557694	0.232362		-0.0715762	0.866036		RPKM<10	pseudogene
LBU_0954	1290	Na+-driven multidrug efflux protein		1.21237	0.792801	2.69692	1.31235	-0.612801	0.485701		1.76628	7.93527e-05	UP	-1.03915	0.00676564		RPKM<10
LBU_0955	156	diguanylate cyclase domain protein		5.01269	0.728428	0	4.22028	-2.78273	0.1123		0	0		4.18324	0.00594295		RPKM<10	pseudogene
LBU_0956	237	diguanylate cyclase		0	1.91789	4.89314	1.19053	0	0		1.35124	0.0634109		-2.03915	0.00992005		RPKM<10	pseudogene
LBU_0957	177	conserved hypothetical protein		35.3437	1.92601	26.6168	22.8488	-4.19776	4.47531e-08	DOWN	3.78865	3.06389e-12	UP	-0.22022	0.452667
LBU_0958	804	conserved hypothetical protein	K01658	16.5344	12.8617	17.8495	17.1961	-0.362394	0.19793		0.472805	0.00754284		-0.0538015	0.745707
LBU_0959	2475	conserved hypothetical protein		3.47546	3.03026	3.98272	2.31805	-0.197763	0.575927		0.394311	0.0623925		-0.780843	0.000318442		RPKM<10
LBU_0960	285	hypothetical protein		0	0	0	0.660014	0	0		0	0		0	0		RPKM<10
LBU_0961	510	methylase involved in ubiquinone/menaquinone biosynthesis		7.66647	4.67908	7.81643	10.5117	-0.712336	0.196567		0.740285	0.0356597		0.427413	0.128224
LBU_0962	1026	ABC-type oligopeptide transport system substrate-binding protein		32.773	32.7835	5.72208	28.9673	0.000462996	0.998208		-2.51836	3.22763e-54	DOWN	2.33981	1.17782e-47	UP
LBU_0963	381	ABC-type oligopeptide transport system substrate-binding protein		373.544	447.083	53.6464	230.069	0.259264	0.000538584		-3.05899	0	DOWN	2.10052	1.38156e-120	UP
LBU_0964	702	hypothetical protein		2182.19	1448.6	264.107	323.421	-0.591117	5.10787e-116		-2.45547	0	DOWN	0.292292	1.20464e-12
LBU_0965	450	Rrf2 family protein		114.69	201.512	72.9628	67.9264	0.813125	3.21257e-13		-1.46563	8.55016e-71	DOWN	-0.103189	0.340974
LBU_0966	186	UDP-glucose 4-epimerase		172.372	210.774	100.926	87.9841	0.290175	0.0694438		-1.0624	1.22717e-19	DOWN	-0.197982	0.170656
LBU_0967	291	UDP-glucose 4-epimerase		542.817	534.591	179.082	132.513	-0.0220304	0.787821		-1.57782	7.22756e-134	DOWN	-0.434485	8.89197e-07
LBU_0968	1065	TIGR02679 family protein		30.8386	35.851	31.5099	24.8156	0.217274	0.179666		-0.186206	0.0725871		-0.344559	0.00160559
LBU_0969	1521	hypothetical protein		30.3332	31.8267	32.4514	30.6086	0.069341	0.636706		0.0280441	0.759009		-0.0843435	0.338567
LBU_0970	972	hypothetical protein		14.4811	20.8097	25.6512	24.0936	0.523083	0.0229264		0.301774	0.0207893		-0.0903801	0.468392
LBU_0971	3753	putative chromosome segregation ATPase		26.4619	43.2678	27.7134	25.1858	0.70938	3.85138e-18		-0.642712	2.68979e-33		-0.137972	0.0218947
LBU_0972	372	hypothetical protein		155.555	59.5666	73.0642	159.029	-1.38485	2.12558e-19	DOWN	0.294659	0.018266		1.12205	1.0058e-33	UP
LBU_0973	645	conserved hypothetical protein	K06889	4.84948	0	1.34846	2.04144	0	0		3.93621	0.00261595		0.598275	0.309702		RPKM<10
LBU_0974	177	LysR family transcriptional regulator		0	0.642005	1.22847	1.06273	0	0		0.936205	0.557421		-0.20908	0.878933		RPKM<10
LBU_0975	639	oxidoreductase		146.851	185.657	45.5975	101.853	0.33829	0.000196076		-2.02561	6.19086e-144	DOWN	1.15946	7.19986e-39	UP
LBU_0976	306	ABC-type transport system ATP-binding protein		0	12.9974	4.97409	23.052	3.34656	6.02744e-05	UP	-1.38572	0.000415138	DOWN	2.21238	1.10288e-11	UP
LBU_0977	930	ABC-type transport system ATP-binding and permease protein		13.4534	26.5148	3.81882	28.2156	0.978826	1.03784e-05		-2.7956	8.84768e-45	DOWN	2.88529	8.73362e-53	UP
LBU_0978	438	ABC-type transport system ATP-binding and permease protein		14.2827	44.6237	6.61915	31.9949	1.64354	3.60602e-09	UP	-2.75309	2.75375e-35	DOWN	2.27312	1.61758e-22	UP
LBU_0979	891	D-isomer specific 2-hydroxyacid dehydrogenase	K00058	128.136	180.719	108.272	100.597	0.496074	4.22206e-10		-0.739086	8.42727e-42		-0.10608	0.0894859
LBU_0980	462	MarR family transcriptional regulator		6.77038	22.1367	11.2955	7.32873	1.70913	1.24918e-05	UP	-0.970685	1.94568e-05		-0.624117	0.03292
LBU_0981	1728	ABC-type transport system ATP-binding and permease protein	K06147	19.9115	74.6386	36.114	9.19837	1.90632	6.04538e-65	UP	-1.04736	1.04267e-59	DOWN	-1.97311	1.04149e-79	DOWN
LBU_0982	1758	ABC-type transport system ATP-binding and permease protein	K06147	33.3609	72.6539	47.7426	10.2719	1.12288	5.05831e-30	UP	-0.605764	5.21106e-24		-2.21657	1.82337e-123	DOWN
LBU_0983	309	rhodanese-like domain protein	K03972	121.473	136.803	124.083	112.01	0.171471	0.264107		-0.140792	0.151804		-0.147679	0.140306
LBU_0984	399	conserved hypothetical protein		50.9561	96.8317	67.9383	122.338	0.926226	1.25196e-07		-0.511254	2.14155e-06		0.848579	3.33316e-18
LBU_0985	930	putative site-specific integrase-resolvase	K07450	39.5194	45.6983	46.7611	60.7798	0.20958	0.171179		0.033167	0.733286		0.378285	6.95498e-06
LBU_0986	426	conserved hypothetical protein		95.4529	47.748	135.772	68	-0.99935	7.24782e-09		1.50767	1.23615e-47	UP	-0.997576	1.67358e-27
LBU_0987	276	acetyltransferase		39.6656	55.1705	71.6918	113.476	0.476009	0.0724369		0.377911	0.010871		0.662504	2.20812e-08
LBU_0988	720	putative phosphoglycolate phosphatase	K01091	78.1979	109.689	130.765	135.853	0.488219	1.82937e-05		0.253559	0.000128902		0.0550648	0.377205
LBU_0989	198	hypothetical protein		0	12.6261	5.12482	7.12515	2.67671	0.00460209		-1.30083	0.00786446		0.475418	0.394228
LBU_0990	741	LytR/AlgR family response regulator		43.2674	35.1179	21.3233	25.5121	-0.301074	0.0900568		-0.719777	1.23663e-07		0.25875	0.0741844
LBU_0991	861	DNA polymerase III, epsilon subunit related 3'-5' exonuclease	K02342	57.218	94.7617	29.4633	63.1383	0.727834	3.7128e-10		-1.68539	6.94498e-78	DOWN	1.0996	3.66781e-30	UP
LBU_0992	774	hypothetical protein		42.433	54.9088	35.1161	65.4962	0.371851	0.0159593		-0.644905	8.14144e-10		0.899277	1.18164e-20
LBU_0993	573	putative phosphinothricin acetyltransferase	K03823	21.8354	20.2282	22.642	30.53	-0.1103	0.704772		0.162633	0.363807		0.431226	0.00508444
LBU_0994	735	type II restriction-modification system modification subunit		420.247	577.605	284.1	133.464	0.458844	2.15803e-21		-1.02368	1.07006e-185	DOWN	-1.08995	6.28946e-110	DOWN
LBU_0995	4446	type II restriction-modification system restriction subunit	K01155	159.175	231.589	140.802	78.2497	0.540955	5.12469e-67		-0.717897	8.48462e-246		-0.847512	2.96672e-215
LBU_0996	228	hypothetical protein		48.0163	16.9455	7.62944	6.60014	-1.50262	3.87785e-05	DOWN	-1.15126	0.00264633		-0.20908	0.667777
LBU_0997	177	hypothetical protein		97.1952	52.0024	20.065	9.03324	-0.902307	0.000620481		-1.3739	8.31606e-08	DOWN	-1.15136	0.00289629
LBU_0998	357	hypothetical protein		295.707	240.957	46.2895	27.3989	-0.295392	0.00210203		-2.38002	1.28038e-127	DOWN	-0.756568	5.29845e-06
LBU_0999	849	conserved hypothetical protein		138.159	168.511	91.0051	77.5458	0.286518	0.000484179		-0.888828	1.20697e-50		-0.230898	0.00106272
LBU_1000	1425	tRNA and rRNA cytosine-C5-methylase	K00599	102.618	152.55	70.7503	69.4995	0.572001	1.12399e-16		-1.10847	5.90323e-109	DOWN	-0.0257342	0.67805
LBU_1001	975	hypothetical protein		71.3807	93.2388	59.5448	50.354	0.385397	0.000231042		-0.646955	1.63595e-19		-0.24187	0.00306171
LBU_1002	741	SAM-dependent methyltransferase		54.8758	58.1209	56.5361	53.9435	0.0828887	0.59351		-0.0398856	0.683		-0.0677239	0.47977
LBU_1003	198	hypothetical protein		466.028	167.009	194.377	117.327	-1.48049	3.66112e-33	DOWN	0.218935	0.0345825		-0.728318	1.43116e-11
LBU_1004	612	pyrrolidone-carboxylate peptidase	K01304	171.218	137.587	235.914	79.4524	-0.315485	0.00109157		0.777915	5.33247e-41		-1.5701	3.29699e-133	DOWN
LBU_1005	753	membrane protein		417.471	413.341	723.064	284.279	-0.0143438	0.805664		0.806791	9.70064e-160		-1.34681	0	DOWN
LBU_1006	588	conserved hypothetical protein	K00651	129	261.283	403.938	127.962	1.01824	9.30434e-31	UP	0.628523	3.66048e-46		-1.65842	7.18824e-236	DOWN
LBU_1007	249	conserved hypothetical protein		6.28096	11.8655	30.5637	48.348	0.917714	0.161801		1.36505	1.2662e-06	UP	0.661637	0.000584309
LBU_1008	1449	NADP-dependent glyceraldehyde-3-phosphate dehydrogenase	K00131	166.758	156.218	202.783	129.492	-0.0941867	0.132467		0.376371	3.78818e-23		-0.647075	3.08043e-64
LBU_1009	1521	ABC-type proline/glycine betaine transport system substrate-binding and permease protein	K05845	25.7061	30.1831	19.0611	22.4463	0.23163	0.114897		-0.663113	5.91451e-11		0.235852	0.0273654
LBU_1010	924	ABC-type proline/glycine betaine transport system ATP-binding protein	K05847	22.0038	38.0013	23.8461	22.4951	0.788298	1.1891e-05		-0.672293	7.08742e-09		-0.0841422	0.524897
LBU_1011	462	Rrf2 family protein		16.926	25.3342	16.9433	16.0825	0.581847	0.0583196		-0.58037	0.00360353		-0.075224	0.738915
LBU_1012	555	conserved hypothetical protein		22.5436	42.997	12.4064	11.5235	0.93152	3.19912e-05		-1.79315	6.44941e-26	DOWN	-0.10651	0.657498
LBU_1013	912	Zn-dependent protease	K03799	17.1487	40.1211	14.4641	9.07519	1.22626	8.81834e-11	UP	-1.47188	1.08596e-29	DOWN	-0.67248	0.000256932
LBU_1014	951	cystathionine beta-lyase	K14155	217.902	699.493	103.575	120.458	1.68263	1.72296e-277	UP	-2.75563	0	DOWN	0.217851	0.000157797
LBU_1015	5472	cell wall-associated serine proteinase	K14647	927.457	177.098	1950.16	744.991	-2.38874	0	DOWN	3.46097	0	UP	-1.38829	0	DOWN
LBU_1016	453	acetyltransferase		8.63112	2.0068	8.15996	1.66096	-2.10465	0.00205547		2.02367	8.11938e-06	UP	-2.29654	5.39345e-07	DOWN	RPKM<10
LBU_1017	501	hypothetical protein		21.8517	20.1866	5.35279	3.9423	-0.114347	0.713699		-1.91504	8.78596e-13	DOWN	-0.441253	0.271096
LBU_1018	279	conserved hypothetical protein		19.6196	17.1063	5.19567	4.04525	-0.197763	0.658167		-1.71915	5.59614e-06	DOWN	-0.361083	0.505445
LBU_1019	1017	aspartate-ammonia ligase	K01914	372.92	146.262	670.134	312.952	-1.35032	4.20011e-115	DOWN	2.1959	0	UP	-1.09851	0	DOWN
LBU_1020	1299	asparaginyl-tRNA synthetase	K01893	372.027	302.851	623.693	256.887	-0.296799	1.99806e-11		1.04223	0	UP	-1.2797	0	DOWN
LBU_1021	1200	transposase	K07485	56.6935	46.5903	130.161	81.7469	-0.283155	0.0184611		1.4822	9.46579e-123	UP	-0.671066	4.40152e-37
LBU_1022	1050	transposase	K07482	110.967	124.782	177.817	271.945	0.169283	0.0473979		0.510983	1.07168e-25		0.612922	7.31744e-57
LBU_1023	1224	transposase		61.3317	34.1647	20.5477	7.76083	-0.844126	8.07453e-12		-0.733527	8.49838e-12		-1.4047	5.85031e-21	DOWN
LBU_1024	636	lac repressor	K02529	7010.77	9595.71	4663.54	4630.88	0.452818	1.06716e-283		-1.04096	0	DOWN	-0.01014	0.365803
LBU_1025	300	lac repressor		7613.87	8797.61	5265.89	5039.93	0.208481	1.85775e-29		-0.740435	0		-0.0632722	2.70858e-05
LBU_1026	3027	beta-galactosidase	K01190	4951.76	7832.24	4366.81	4754.36	0.661484	0		-0.842846	0		0.122673	1.093e-135
LBU_1027	1884	lactose permease	K11104	2950.69	3830.59	2933.35	3742.56	0.376517	1.18724e-238		-0.385019	0		0.351477	0
LBU_1028	1224	transposase		163.551	32.3079	20.5477	9.52814	-2.33978	2.8058e-129	DOWN	-0.652909	2.11662e-09		-1.10871	6.62299e-15	DOWN
LBU_1029	738	transposase		28.609	52.3521	29.8561	17.2046	0.871778	5.25056e-07		-0.810221	8.15233e-13		-0.795229	3.72585e-08
LBU_1030	495	galactoside-O-acetyltransferase	K00680	48.9724	71.1652	59.7408	70.1115	0.539202	0.00187748		-0.252456	0.0204199		0.230934	0.029246
LBU_1031	312	alpha/beta hydrolase superfamily protein		47.6205	72.1144	27.1799	77.7738	0.598703	0.00647545		-1.40775	1.03732e-17	DOWN	1.51675	1.4696e-22	UP
LBU_1032	837	site-specific recombinase		13.0797	28.5105	13.1624	27.4178	1.12416	1.15284e-06	UP	-1.11508	2.0481e-13	DOWN	1.05869	7.86207e-13	UP
LBU_1033	567	signal peptidase I	K03100	253.764	287.193	227.921	302.559	0.178535	0.0192934		-0.333489	5.20193e-11		0.408682	2.35497e-17
LBU_1034	186	hypothetical protein		563.362	151.513	146.128	148.663	-1.89462	1.33109e-52	DOWN	-0.0522068	0.666994		0.0248083	0.833722
LBU_1035	1224	transposase		129.691	38.621	17.2317	8.60607	-1.74762	7.53386e-71	DOWN	-1.16432	7.38851e-27	DOWN	-1.00164	5.4856e-11	DOWN
LBU_1036	1239	peptidase T	K01258	173.563	119.78	159.174	54.4272	-0.535074	8.80176e-15		0.410225	1.48238e-18		-1.54821	1.00739e-177	DOWN
LBU_1037	798	nif3-like protein		150.908	91.5629	214.078	55.5119	-0.720837	3.79658e-14		1.2253	1.3272e-100	UP	-1.94727	9.01706e-212	DOWN
LBU_1038	693	SAM-dependent methyltransferase	K06967	102.684	88.3826	179.473	63.2442	-0.216379	0.0646598		1.02194	2.02493e-55	UP	-1.50476	4.16682e-108	DOWN
LBU_1039	441	NUDIX family hydrolase	K03574	51.4227	47.9276	84.8061	33.9099	-0.101548	0.637198		0.823311	9.28186e-13		-1.32246	6.67808e-28	DOWN
LBU_1040	828	putative peptidase M23		52.8875	71.7766	83.6842	32.9409	0.440587	0.000772068		0.221442	0.0040344		-1.34507	1.07146e-51	DOWN
LBU_1041	726	methylated DNA-protein cysteine methyltransferase	K00567	9.69396	24.5739	11.1814	3.62735	1.34197	1.33693e-06	UP	-1.13602	1.19404e-10	DOWN	-1.62412	3.3322e-09	DOWN
LBU_1042	342	methylphosphotriester-DNA alkyltransferase		11.4324	21.265	26.0672	17.8754	0.895346	0.0288413		0.293757	0.181458		-0.544264	0.01345
LBU_1043	540	transposase		14.4811	11.153	14.8986	0.522511	-0.376733	0.310398		0.417738	0.0756394		-4.83357	5.76697e-24	DOWN
LBU_1044	333	hypothetical protein		746.755	524.836	174.125	59.5945	-0.508769	1.60356e-15		-1.59174	4.35163e-152	DOWN	-1.54687	2.67729e-53	DOWN
LBU_1045	1803	type I restriction-modification system restriction subunit	K01153	419.831	868.175	185.641	96.6602	1.04818	0	UP	-2.22547	0	DOWN	-0.941523	4.87341e-138
LBU_1046	549	conserved hypothetical protein		471.467	901.213	214.534	110.327	0.934713	1.64464e-83		-2.07066	0	DOWN	-0.959424	4.03243e-51
LBU_1047	972	putative integrase		590.507	1276.99	246.222	185.782	1.11272	5.16042e-276	UP	-2.37471	0	DOWN	-0.406351	2.0659e-23
LBU_1048	1131	type I restriction-modification system modification subunit	K03427	348.468	644.935	151.304	174.965	0.888127	1.82274e-112		-2.09171	0	DOWN	0.209619	1.55824e-06
LBU_1049	1440	type I restriction-modification system modification subunit	K03427	38.0129	78.4396	40.6188	20.2473	1.04509	6.47168e-24	UP	-0.949434	7.34656e-45		-1.00442	4.29463e-28	DOWN
LBU_1050	564	type I restriction-modification system specificity subunit		52.6866	86.2335	36.6254	18.01	0.710814	2.40108e-06		-1.23541	3.75229e-30	DOWN	-1.02405	3.86522e-11	DOWN
LBU_1051	789	hypothetical protein		915.778	742.011	404.931	251.997	-0.303558	4.18744e-17		-0.873766	1.95747e-196		-0.684266	8.55054e-77
LBU_1052	876	hypothetical protein		219.597	283.828	224.968	133.455	0.370157	3.39177e-09		-0.335294	3.10727e-16		-0.753367	1.7686e-56
LBU_1053	1002	hypothetical protein		188.861	154.121	173.242	120.24	-0.293259	3.83218e-05		0.168723	0.000453546		-0.526872	3.96413e-27
LBU_1054	900	DNA helicase		117.297	125.882	97.6865	57.6852	0.101908	0.271531		-0.365843	2.37969e-09		-0.759957	2.07729e-26
LBU_1055	2130	DNA helicase		110.872	106.326	131.178	111.935	-0.0604044	0.346865		0.303032	3.59061e-15		-0.228862	4.61721e-10
LBU_1056	180	hypothetical protein		212.872	119.948	7.65063	16.1978	-0.82758	1.79021e-06		-3.97069	2.34086e-52	DOWN	1.08215	0.0104235
LBU_1057	414	conserved hypothetical protein		207.772	216.29	58.4739	48.1619	0.0579665	0.588836		-1.8871	1.86389e-99	DOWN	-0.279901	0.0286591
LBU_1058	2295	copper-transporting ATPase	K01533	3786.21	4451.32	281.486	361.455	0.233477	1.70478e-137		-3.9831	0	DOWN	0.36075	2.49805e-62
LBU_1059	1224	transposase		166.746	37.8783	27.2391	14.1385	-2.13821	3.75829e-118	DOWN	-0.475693	1.16235e-06		-0.946045	3.43163e-15
LBU_1060	270	conserved hypothetical protein		0	6.73392	1.34222	0	2.21727	0.0315279		-2.32683	0.000663272	DOWN	-2.94605	0.0772206		RPKM<10
LBU_1061	222	conserved hypothetical protein		0	0	0.65297	0.847315	0	0		0	0		0.375883	0.805546		RPKM<10	pseudogene
LBU_1062	1137	DNA-directed RNA polymerase sigma subunit	K03087	645.804	998.727	779.555	428.487	0.628995	2.54992e-96		-0.357441	2.44052e-77		-0.8634	0
LBU_1063	1122	DNA-directed RNA polymerase sigma subunit	K03086	492.745	662.87	539.786	305.795	0.427885	3.23861e-32		-0.296338	2.03178e-36		-0.819824	7.06448e-197
LBU_1064	1119	DNA-directed RNA polymerase sigma subunit	K03086	361.989	485.715	516.814	268.624	0.424166	1.5349e-23		0.0895349	0.000573936		-0.944058	1.98159e-238
LBU_1065	1839	DNA primase	K02316	339.751	312.233	423.094	194.65	-0.121853	0.0014562		0.438353	1.82419e-77		-1.12009	0	DOWN
LBU_1066	2067	putative glycyl-tRNA synthetase beta subunit	K01879	497.864	521.115	611.606	364.969	0.0658498	0.0236286		0.231001	2.08592e-38		-0.744829	0
LBU_1067	912	glycyl-tRNA synthetase alpha subunit	K01878	392.705	430.492	479.701	387.036	0.132541	0.00633111		0.15615	2.14562e-07		-0.309666	1.45947e-25
LBU_1068	750	DNA repair protein RecO	K03584	71.9421	104.999	69.0973	49.6595	0.545461	2.14901e-06		-0.603669	2.82005e-15		-0.47656	9.14645e-08
LBU_1069	906	GTP-binding protein Era	K03595	387.537	641.046	331.518	216.859	0.726093	6.32966e-64		-0.951339	1.27806e-224		-0.612329	1.2496e-59
LBU_1070	420	cytidine deaminase	K01489	413.332	832.781	449.201	349.336	1.01064	1.80595e-67	UP	-0.890575	7.49585e-122		-0.362747	1.91133e-15
LBU_1071	525	metal-dependent hydrolase	K07042	379.819	820.768	304.829	260.838	1.11166	1.61919e-96	UP	-1.42898	0	DOWN	-0.224847	3.873e-06
LBU_1072	1065	PhoH family protein	K06217	415.587	925.724	307.817	248.156	1.15543	4.35222e-233	UP	-1.58851	0	DOWN	-0.310827	1.20507e-19
LBU_1073	177	30S ribosomal protein S21	K02970	2421.04	919.351	1289.48	510.644	-1.39694	1.06126e-136	DOWN	0.488105	1.06655e-28		-1.3364	4.66173e-165	DOWN
LBU_1074	858	PEP synthetase regulatory protein	K09773	926.892	927.091	98.329	91.3116	0.000309628	0.995149		-3.23702	0	DOWN	-0.10682	0.110529
LBU_1075	222	hypothetical protein		683.351	323.501	427.369	344.01	-1.07886	2.83815e-33	DOWN	0.401711	2.50125e-09		-0.313031	1.06693e-06
LBU_1076	885	membrane protein		232.385	359.009	418.908	268.659	0.627504	8.37325e-28		0.222613	1.54753e-11		-0.640855	2.69069e-79
LBU_1077	201	Preprotein translocase SecY family protein		116.713	138.51	134.141	151.138	0.247022	0.195189		-0.0462364	0.703505		0.172114	0.127512
LBU_1078	312	Preprotein translocase SecY family protein		115.292	69.2007	89.2057	115.153	-0.736432	2.96618e-05		0.36635	0.00327736		0.368349	0.000500461
LBU_1079	1185	aspartate/tyrosine/aromatic aminotransferase	K00841	1746.75	2297.92	996.916	1015.84	0.395653	3.49381e-99		-1.20478	0	DOWN	0.0271304	0.120603
LBU_1080	1311	diaminopimelate decarboxylase	K01586	46.5251	24.8766	72.8114	27.5484	-0.903221	6.8824e-11		1.54938	1.15347e-80	UP	-1.40219	3.81798e-75	DOWN
LBU_1081	381	hypothetical protein		537.739	499.874	27.2036	17.033	-0.105342	0.121996		-4.19969	0	DOWN	-0.675464	0.00116505
LBU_1082	897	aldose epimerase family protein		745.365	813.179	630.5	554.875	0.125627	0.000378357		-0.367077	9.9317e-53		-0.184333	5.7261e-13
LBU_1083	1395	ATP-dependent protease HslVU ATPase subunit	K03667	322.882	432.22	290.594	318.159	0.420758	1.31865e-25		-0.57276	2.28414e-97		0.130742	5.48271e-06
LBU_1084	534	ATP-dependent protease HslVU peptidase subunit	K01419	502.283	782.463	490.934	642.513	0.639523	2.4712e-37		-0.672493	5.66851e-90		0.388195	2.33882e-30
LBU_1085	888	site-specific recombinase	K03733	165.554	271.674	163.487	195.2	0.714574	1.27329e-26		-0.732699	6.29808e-61		0.255776	5.00918e-08
LBU_1086	1320	glucose-inhibited division protein	K04094	179.5	292.179	199.758	237.125	0.702871	1.33229e-40		-0.548598	2.77613e-58		0.247393	1.11035e-12
LBU_1087	2184	putative DNA topoisomerase I	K03168	119.946	110.877	183.19	106.196	-0.113428	0.0582585		0.72438	5.05997e-98		-0.786613	1.01833e-121
LBU_1088	1368	transposase		33.1541	48.6769	59.9758	41.1134	0.55405	1.01264e-05		0.301144	2.50471e-05		-0.544774	2.47428e-14
LBU_1089	840	Smf family DNA processing protein	K04096	21.4113	21.2389	47.1981	17.0189	-0.0116668	0.963217		1.15202	2.07834e-22	UP	-1.47159	2.08011e-34	DOWN
LBU_1090	771	ribonuclease HII	K03470	107.509	117.614	141.011	89.9044	0.129599	0.211153		0.261745	2.17856e-05		-0.649343	7.27335e-25
LBU_1091	858	GTP-binding protein	K14540	125.773	131.382	137.61	99.3137	0.0629462	0.504708		0.0668173	0.250961		-0.470521	1.20544e-15
LBU_1092	231	hypothetical protein		1266.06	646.39	903.956	1412.82	-0.969871	5.27665e-53		0.483847	5.4182e-26		0.644249	1.22173e-70
LBU_1093	861	conserved hypothetical protein		945.459	1546.15	1195.03	2638.92	0.709589	3.99782e-139		-0.37163	4.15525e-97		1.1429	0	UP
LBU_1094	663	hemolysin III	K11068	53.0755	27.5946	26.3463	22.6973	-0.943662	3.04352e-07		-0.0667848	0.65877		-0.215078	0.152175
LBU_1095	1056	polynucleotide adenylyltransferase	K00974	84.4182	90.7142	63.0079	39.0102	0.103773	0.304801		-0.525796	1.47866e-14		-0.691681	1.8136e-17
LBU_1096	900	membrane protein		282.381	289.769	276.147	265.645	0.0372569	0.54955		-0.0694635	0.0739521		-0.0559411	0.148641
LBU_1097	495	diguanylate cyclase		61.6105	24.7931	49.3447	82.4618	-1.31324	4.23165e-10	DOWN	0.99296	1.43078e-11		0.740829	1.62478e-12
LBU_1098	192	diguanylate cyclase		162.912	210.106	185.352	187.614	0.367022	0.0205167		-0.180853	0.0727171		0.0175041	0.865851
LBU_1099	294	hypothetical protein		93.0928	102.426	231.491	216.256	0.13784	0.453685		1.17638	1.36842e-38	UP	-0.0982192	0.188177
LBU_1100	1773	ABC-type transport system ATP-binding and permease protein	K06147	26.0219	24.2908	41.0023	15.9671	-0.0993146	0.503569		0.755295	2.07591e-20		-1.3606	4.31314e-55	DOWN
LBU_1101	1743	ABC-type transport system ATP-binding and permease protein	K06147	26.0211	16.2987	46.5733	8.36378	-0.674922	1.38495e-05		1.51474	1.19977e-66	UP	-2.47728	4.15474e-136	DOWN
LBU_1102	903	malolactic fermentation system transcription activator	K05817	548.165	501.226	503.585	443.492	-0.129148	0.00273874		0.00677279	0.820844		-0.183327	1.35098e-10
LBU_1103	825	hypothetical protein		162.083	164.874	36.5473	47.881	0.0246293	0.779908		-2.17352	4.47019e-180	DOWN	0.389689	0.000116306
LBU_1104	588	membrane-associated phospholipid phosphatase		49.2062	86.9654	46.4708	40.9478	0.821602	3.88804e-08		-0.904118	1.33829e-19		-0.182538	0.125976
LBU_1105	837	degv family protein		1107.1	1138.66	196.656	255.412	0.0405422	0.197052		-2.53358	0	DOWN	0.377153	1.60801e-18
LBU_1106	1278	enolase	K01689	17814.8	14706.5	9122	18304.2	-0.276627	0		-0.689028	0		1.00475	0	UP
LBU_1107	321	membrane protein		48.7215	75.0485	181.312	134.486	0.623267	0.00344524		1.27258	2.1097e-37	UP	-0.431023	2.48318e-07
LBU_1108	1332	hypothetical protein		66.3391	36.5133	75.4724	40.7417	-0.861438	4.00219e-14		1.04753	6.62974e-47	UP	-0.889442	8.43376e-39
LBU_1109	609	hypothetical protein		125.836	455.099	149.601	87.5657	1.85464	5.32988e-133	UP	-1.60506	4.71506e-243	DOWN	-0.772681	4.58242e-28
LBU_1110	741	ABC-type glutamine transport system ATP-binding protein	K02028	413.679	286.311	415.12	141.015	-0.530929	3.01729e-20		0.535945	6.23563e-45		-1.55768	8.8128e-279	DOWN
LBU_1111	1482	ABC-type glutamine transport system substrate-binding and permease protein	K02029	145.104	173.979	275.051	113.027	0.261827	1.56606e-05		0.660783	3.54111e-85		-1.28303	1.03017e-275	DOWN
LBU_1112	855	LysR family transcriptional regulator		22.8649	20.3347	12.631	18.8104	-0.169194	0.46175		-0.686977	3.4967e-05		0.574567	0.00045669
LBU_1113	2259	cation-transporting ATPase	K01535	81.0019	209.613	105.816	55.7484	1.3717	7.97851e-147	UP	-0.986175	1.18798e-194		-0.924553	4.33858e-96
LBU_1114	672	LytR family transcriptional regulator		137.312	241.136	112.71	76.8371	0.81239	1.47702e-22		-1.09723	2.45646e-80	DOWN	-0.552742	1.17644e-13
LBU_1115	1134	conserved hypothetical protein		128.261	95.0965	100.73	90.1539	-0.43162	1.93389e-07		0.0830303	0.160605		-0.160033	0.0053648
LBU_1116	1026	branched-chain amino acid aminotransferase	K00826	810.179	660.433	977.416	699.982	-0.294829	1.67005e-18		0.565559	2.80963e-157		-0.481655	3.88119e-127
LBU_1117	888	cation efflux system protein	K16264	217.51	202.572	222.744	191.176	-0.102647	0.143816		0.136954	0.00228249		-0.220491	4.535e-07
LBU_1118	303	ArsR family transcriptional regulator	K03892	139.363	48.0042	14.1132	19.245	-1.53761	9.66964e-17	DOWN	-1.76611	4.6253e-16	DOWN	0.447436	0.0971504
LBU_1119	528	adenine phosphoribosyltransferase	K00759	779.017	600.887	562.678	1685.81	-0.374561	1.16188e-14		-0.0947842	0.00715509		1.58306	0	UP
LBU_1120	2277	single-stranded-DNA-specific exonuclease RecJ	K07462	121.573	133.248	170.934	110.161	0.132293	0.0169787		0.359325	8.65105e-28		-0.633822	1.3908e-81
LBU_1121	708	sortase	K07284	372.213	292.594	357.587	138.82	-0.347232	1.00973e-08		0.289395	7.82837e-13		-1.36508	6.72463e-189	DOWN
LBU_1122	1839	GTP-binding protein LepA	K03596	230.044	396.27	361.807	234.593	0.784573	3.61e-91		-0.131263	1.55221e-08		-0.625061	4.90407e-135
LBU_1123	1137	heat-shock protein	K03686	246.217	469.231	186.904	134.088	0.930368	2.97224e-89		-1.328	0	DOWN	-0.479118	7.01968e-28
LBU_1124	1845	class I heat-shock protein	K04043	1318.13	3097.58	826.7	618.551	1.23265	0	UP	-1.90571	0	DOWN	-0.418471	5.39379e-149
LBU_1125	618	heat shock protein GrpE	K03687	889.533	3070.16	553.332	545.441	1.78719	0	UP	-2.4721	0	DOWN	-0.020722	0.532692
LBU_1126	1047	heat-inducible transcription repressor HrcA	K03705	794.676	3930.33	625.042	461.008	2.30621	0	UP	-2.65263	0	DOWN	-0.439162	1.09787e-70
LBU_1127	939	riboflavin kinase/FMN adenylyltransferase	K11753	161.559	176.806	95.5589	65.0051	0.130102	0.0858481		-0.887702	2.16149e-58		-0.555838	4.55109e-16
LBU_1128	558	putative integrase/recombinase		106.506	232.564	109.888	73.8258	1.12669	1.21841e-30	UP	-1.08159	3.26128e-63	DOWN	-0.573844	5.15851e-12
LBU_1129	540	conserved hypothetical protein		60.8206	74.0731	53.9571	25.2547	0.284389	0.0721719		-0.457137	1.36955e-05		-1.09526	9.71036e-17	DOWN
LBU_1130	1224	transposase		65.165	38.621	34.7594	10.066	-0.754711	1.61117e-10		-0.15198	0.101549		-1.78791	3.26482e-48	DOWN
LBU_1131	666	5,10-methylenetetrahydrofolate reductase	K00297	427.388	133.427	859.744	343.304	-1.6795	3.57334e-119	DOWN	2.68785	0	UP	-1.32442	0	DOWN
LBU_1132	2286	5-methyltetrahydropteroyltriglutamate- - homocysteine methyltransferase	K00549	237.057	81.8211	449.526	211.473	-1.53469	2.54408e-198	DOWN	2.45786	0	UP	-1.08793	0	DOWN
LBU_1133	474	autoinducer-2 production protein LuxS	K07173	301.903	109.08	760.425	352.397	-1.4687	4.14536e-50	DOWN	2.80142	0	UP	-1.1096	4.11181e-194	DOWN
LBU_1134	210	transposase		0	0	2.76113	2.23933	0	0		3.35124	0.0209859		-0.302189	0.726251		RPKM<10	pseudogene
LBU_1135	174	transposase		0	25.4699	10.8303	5.94582	3.50268	1.56373e-05	UP	-1.23372	0.000660464	DOWN	-0.865125	0.0896627
LBU_1136	912	cysteine synthase	K01738	80.5988	110.271	151.715	40.529	0.452219	6.53574e-06		0.46031	2.6886e-16		-1.90433	7.59091e-167	DOWN
LBU_1137	1185	cystathionine beta-lyases/cystathionine gamma-synthases	K01760	120.101	76.1401	155.724	33.3349	-0.657525	3.26042e-14		1.03226	9.12609e-83	UP	-2.22389	1.24004e-270	DOWN
LBU_1138	333	serine O-acetyltransferase	K00640	129.156	74.3916	158.454	37.8468	-0.795901	9.87742e-07		1.09085	5.50033e-27	UP	-2.06582	1.05034e-71	DOWN
LBU_1139	264	serine acetyltransferase		130.33	72.3131	115.034	81.9392	-0.84984	3.69862e-06		0.669732	8.22944e-08		-0.489434	2.95004e-05
LBU_1140	897	tRNA pseudouridine synthase B	K03177	80.203	70.3092	89.3673	151.196	-0.189944	0.102966		0.346034	1.98352e-06		0.758603	8.38398e-40
LBU_1141	363	putative ribosome binding factor A	K02834	2076.66	947.27	707.625	438.132	-1.13242	6.95925e-173	DOWN	-0.420791	1.12468e-32		-0.691619	3.388e-63
LBU_1142	2478	translation initiation factor IF-2	K02519	632.715	904.126	688.176	397.463	0.514967	4.15435e-132		-0.393745	1.05177e-180		-0.791959	0
LBU_1143	285	ribosomal protein L7A		1092.03	1309.39	1346.34	757.036	0.261888	1.87969e-07		0.0401468	0.210909		-0.83061	4.21097e-128
LBU_1144	309	putative nucleic-acid-binding protein implicated in transcription termination	K07742	465.645	789.192	591.331	393.862	0.761147	7.23059e-30		-0.416411	3.46423e-23		-0.586276	3.20228e-34
LBU_1145	1407	N utilization substance protein A	K02600	759.748	997.596	880.161	484.03	0.392934	4.22163e-51		-0.180687	4.96106e-27		-0.862671	0
LBU_1146	4338	DNA polymerase III alpha subunit	K03763	170.348	148.92	216.687	100.296	-0.193951	3.78895e-08		0.541078	2.60141e-136		-1.11135	0	DOWN
LBU_1147	1698	prolyl-tRNA synthetase	K01881	455.924	523.871	543.469	321.815	0.200418	4.23993e-10		0.0529861	0.00983194		-0.755966	2.51511e-260
LBU_1148	1248	putative membrane-associated Zn-dependent proteases	K11749	380.964	443.795	521.412	352.846	0.220237	7.41802e-08		0.232531	9.7044e-21		-0.563386	6.78847e-110
LBU_1149	798	phosphatidate cytidylyltransferase	K00981	220.483	295.764	413.17	253.87	0.423779	6.03326e-11		0.482291	6.382e-40		-0.702648	6.7093e-83
LBU_1150	732	undecaprenyl pyrophosphate synthetase	K00806	353.6	420.697	410.817	292.82	0.250664	5.91863e-06		-0.0342865	0.34019		-0.48848	3.54129e-40
LBU_1151	558	ribosome recycling factor	K02838	924.922	1012.94	699.208	694.771	0.131143	0.00113128		-0.534753	6.68385e-81		-0.00918318	0.769267
LBU_1152	726	amino acid kinase family protein	K09903	379.142	498.835	325.859	307.547	0.395826	2.43092e-14		-0.614315	7.93471e-67		-0.0834384	0.0349909
LBU_1153	1029	translation elongation factor Ts	K02357	1500.88	1257.71	2291.6	470.991	-0.255009	1.52475e-25		0.86555	0		-2.28258	0	DOWN
LBU_1154	762	30S ribosomal protein S2	K02967	5606.24	5998.79	11064.9	979.523	0.0976373	1.89382e-12		0.883253	0		-3.49777	0	DOWN
LBU_1155	1011	GIY-YIG catalytic domain protein		45.6348	90.7055	74.8454	66.8876	0.991056	3.89547e-18		-0.277276	3.81472e-05		-0.162175	0.0220933
LBU_1156	615	acyltransferase family protein	K00655	66.1186	159.828	111.135	89.0053	1.27339	2.75217e-28	UP	-0.5242	7.95007e-15		-0.320356	2.39478e-05
LBU_1157	987	aspartate-semialdehyde dehydrogenase	K00133	403.27	388.799	332.804	125.974	-0.052721	0.282769		-0.224352	4.72017e-12		-1.40154	1.47161e-254	DOWN
LBU_1158	1341	aspartate kinase	K00928	242.583	251.335	195.009	83.4615	0.0511375	0.340751		-0.366077	4.45176e-25		-1.22436	5.02402e-165	DOWN
LBU_1159	1149	homoserine dehydrogenase	K00003	257.938	235.874	140.607	83.8201	-0.129006	0.0214261		-0.74635	2.0155e-70		-0.746298	7.59777e-46
LBU_1160	435	chorismate mutase	K06209	26.9648	27.6903	26.6592	7.78361	0.0383042	0.897687		-0.0547496	0.767677		-1.77612	4.44205e-14	DOWN
LBU_1161	1791	ABC-type transport system ATP-binding and permease protein	K06147	110.9	134.128	127.517	88.118	0.274349	1.30806e-05		-0.0729229	0.0720714		-0.533184	5.88754e-36
LBU_1162	1761	ABC-type transport system ATP-binding and permease protein	K06147	78.1535	108.085	74.908	69.1103	0.467788	1.22872e-10		-0.52898	9.11008e-28		-0.116218	0.0291149
LBU_1163	225	hypothetical protein		629.059	503.529	420.704	891.195	-0.321122	0.000106508		-0.259268	1.74662e-05		1.08294	1.54023e-104	UP
LBU_1164	402	hypothetical protein		511.594	400.549	205.359	689.949	-0.353021	2.8842e-07		-0.963829	7.78656e-65		1.74834	2.63976e-296	UP
LBU_1165	621	LexA repressor	K01356	916.717	931.037	318.514	454.812	0.0223627	0.593488		-1.54748	0	DOWN	0.513915	2.35258e-41
LBU_1166	849	putative glucose uptake protein	K05340	896.191	1282.24	410.462	334.001	0.516788	2.9581e-65		-1.64335	0	DOWN	-0.297396	3.06917e-19
LBU_1167	684	ABC-type glutamine transport system substrate-binding protein	K10039	700.809	879.009	397.155	242.83	0.326856	2.01396e-16		-1.14618	0	DOWN	-0.709753	8.90053e-70
LBU_1168	207	hypothetical protein		483.543	729.02	462.189	236.266	0.592314	1.15823e-12		-0.657474	2.88645e-32		-0.968072	2.0315e-42
LBU_1169	534	hypothetical protein		360.238	438.792	231.419	144.248	0.284588	8.28498e-06		-0.92303	3.48323e-87		-0.681954	1.82289e-30
LBU_1170	2235	ATP-dependent helicase	K03724	145.2	330.024	78.3818	29.2466	1.18453	1.05686e-181	UP	-2.07398	0	DOWN	-1.42225	1.60174e-139	DOWN
LBU_1171	1323	biotin carboxylase		429.704	693.49	128.469	119.502	0.690531	7.31699e-92		-2.43245	0	DOWN	-0.104385	0.0258374
LBU_1172	1899	hypothetical protein		627.56	1264.34	147.326	157.496	1.01056	0	UP	-3.10131	0	DOWN	0.0963087	0.00612255
LBU_1173	1851	putative secreted 5-nucleotidase		581.732	151.206	1002.11	1492.69	-1.94384	0	DOWN	2.72845	0	UP	0.574877	0
LBU_1174	348	ribosomal protein L19	K02884	2316.73	1002.14	2578.44	500.8	-1.209	5.51124e-205	DOWN	1.36341	0	UP	-2.36419	0	DOWN
LBU_1175	1914	putative helicase		58.0152	59.311	94.9733	114.199	0.0318681	0.738231		0.679224	9.79696e-41		0.265955	1.94729e-10
LBU_1176	477	DNA/RNA helicase, superfamily ii, snf2 family protein		134.428	176.765	181.427	314.493	0.394998	0.000286989		0.0375545	0.584119		0.793636	2.62234e-47
LBU_1177	738	tRNA (guanine-N1)-methyltransferase	K00554	156.82	187.39	224.805	436.743	0.256934	0.00205492		0.262631	1.33678e-07		0.958111	7.09476e-137
LBU_1178	504	16S rRNA processing protein	K02860	80.6804	105.744	183.5	361.093	0.390279	0.00459147		0.795211	8.49138e-28		0.976588	1.98955e-80
LBU_1179	273	30S ribosomal protein S16	K02959	1280.38	331.747	991.617	494.72	-1.94842	9.33292e-179	DOWN	1.5797	4.55517e-232	UP	-1.00317	3.2471e-124	DOWN
LBU_1180	1404	signal recognition particle protein Ffh	K03106	216.66	175.794	358.423	144.561	-0.301544	7.3401e-08		1.02778	3.15992e-221	UP	-1.30998	0	DOWN
LBU_1181	342	transcriptional regulator	K09787	443.579	453.875	811.687	398.758	0.0331033	0.684377		0.83863	8.73606e-88		-1.02541	5.7727e-132	DOWN
LBU_1182	408	conserved hypothetical protein		42.1656	39.2709	48.6751	25.1266	-0.102606	0.678554		0.309723	0.0345396		-0.953965	1.02456e-09
LBU_1183	474	conserved hypothetical protein		42.8934	20.3776	72.7855	41.6686	-1.07377	1.5574e-05	DOWN	1.83667	5.87468e-38	UP	-0.80469	3.07002e-12
LBU_1184	1329	putative signal recognition particle	K03110	182.991	125.776	205.332	149.676	-0.540915	7.55448e-17		0.707095	1.18495e-64		-0.456109	1.91745e-32
LBU_1185	3561	chromosome segregation ATPase	K03529	85.6422	99.2111	137.489	106.782	0.212179	3.65332e-05		0.470748	4.91565e-56		-0.364647	3.90105e-38
LBU_1186	696	dsRNA-specific ribonuclease	K03685	44.9413	78.8587	102.159	78.1064	0.811226	1.75683e-08		0.373473	1.50011e-06		-0.387301	2.43429e-07
LBU_1187	1779	ABC-type oligopeptide transport system substrate-binding protein	K02035	58.9012	96.1968	116.97	96.061	0.707691	5.6131e-19		0.282074	2.42224e-10		-0.284112	3.67576e-11
LBU_1188	1773	ABC-type oligopeptide transport system substrate-binding protein	K02035	1755.82	397.946	3691.02	1785.61	-2.1415	0	DOWN	3.21338	0	UP	-1.04761	0	DOWN
LBU_1189	912	ABC-type oligopeptide transport system permease protein	K02034	62.5927	14.7028	101.011	46.7166	-2.08991	4.20658e-33	DOWN	2.78035	6.95843e-162	UP	-1.1125	5.48627e-51	DOWN
LBU_1190	960	ABC-type oligopeptide transport system permease protein	K02033	56.2048	27.4617	89.0141	45.7524	-1.03327	6.54275e-12	DOWN	1.69661	3.01863e-82	UP	-0.960187	1.48921e-37
LBU_1191	957	ABC-type oligopeptide transport system ATP-binding protein	K02032	129.104	51.5335	239.1	133.658	-1.32496	2.35717e-37	DOWN	2.21403	0	UP	-0.839065	2.44511e-78
LBU_1192	1002	ABC-type oligopeptide transport system ATP-binding protein	K02031	82.7244	31.3006	220.911	112.168	-1.40212	1.08695e-27	DOWN	2.8192	0	UP	-0.977807	1.12135e-97
LBU_1193	243	putative acyl carrier protein	K02078	1464.2	765.048	372.838	478.775	-0.936491	1.26023e-60		-1.037	5.4826e-84	DOWN	0.3608	5.82316e-10
LBU_1194	993	fatty acid-phospholipid synthesis protein	K03621	1319.84	1738.97	962.454	1754.88	0.397872	5.22328e-64		-0.853442	0		0.866583	0
LBU_1195	2040	ATP-dependent DNA helicase RecG	K03655	396.356	221.811	332.98	278.652	-0.837469	8.10267e-113		0.586106	4.84538e-114		-0.256971	1.03928e-27
LBU_1196	1665	dihydroacetone kinase	K07030	1061.9	1110.28	1064.86	2091.51	0.0642784	0.00357261		-0.0602518	2.96377e-05		0.973879	0
LBU_1197	363	conserved hypothetical protein		1249.44	1484.77	1419.24	3084.02	0.248949	2.24126e-09		-0.0651134	0.0156201		1.11969	0	UP
LBU_1198	186	ribosomal protein L28	K02902	1681.68	359.844	1244.62	294.292	-2.22446	2.1663e-189	DOWN	1.79027	6.68371e-237	UP	-2.08039	0	DOWN
LBU_1199	1572	ABC-type multidrug transport system ATP-binding and permease protein		61.6829	37.3	110.84	27.8207	-0.725695	9.13913e-12		1.57124	7.77451e-149	UP	-1.99425	8.52504e-223	DOWN
LBU_1200	720	LPXTG-motif cell wall anchor domain protein		2.17217	37.8783	6.14064	0.783767	4.12416	1.55664e-30	UP	-2.62491	2.85828e-46	DOWN	-2.96989	2.50647e-10	DOWN
LBU_1201	594	peptidase		9.21525	26.7826	10.6157	1.7417	1.5392	4.10273e-07	UP	-1.3351	4.87177e-12	DOWN	-2.60763	1.53758e-12	DOWN
LBU_1202	180	hypothetical protein		0	18.9391	4.83198	0	3.12416	0.000326624	UP	-1.97069	2.56228e-05	DOWN	-4.20908	0.00149053
LBU_1203	684	thiamine pyrophosphokinase	K00949	88.0298	127.092	83.4999	65.5889	0.529804	1.23496e-06		-0.606021	8.01215e-17		-0.348324	2.94324e-05
LBU_1204	894	conserved hypothetical protein	K06949	154.821	195.874	124.853	83.8473	0.33932	5.29606e-06		-0.649694	1.91883e-36		-0.574396	9.32067e-21
LBU_1205	2007	serine/threonine protein kinase	K08884	270.011	314.237	188.584	161.252	0.218835	1.11633e-08		-0.736643	4.41158e-158		-0.225892	7.37786e-13
LBU_1206	756	putative protein phosphatase 2C	K01090	325.825	504.442	455.49	530.473	0.630593	2.21945e-33		-0.147269	4.94417e-06		0.219859	6.32141e-13
LBU_1207	1317	tRNA and rRNA cytosine-C5-methylase	K03500	183.471	320.369	259.265	264.231	0.804181	1.29272e-55		-0.305309	1.8217e-22		0.0273747	0.40521
LBU_1208	948	methionyl-tRNA formyltransferase	K00604	67.6396	102.967	71.4857	58.8321	0.606237	5.84829e-09		-0.526449	7.76236e-15		-0.281052	0.000209689
LBU_1209	2382	primosomal replication factor Y	K04066	27.9044	43.5552	43.1774	45.4466	0.642354	2.47388e-10		-0.0125694	0.841312		0.073896	0.21007
LBU_1210	222	DNA-directed RNA polymerase omega subunit	K03060	616.425	269.755	370.887	280.885	-1.19228	3.64352e-35	DOWN	0.459331	3.18887e-10		-0.400999	9.09164e-09
LBU_1211	615	guanylate kinase	K00942	2545.57	2686.59	2584.52	1500.55	0.0777878	0.000851648		-0.0558787	0.000254987		-0.784404	0
LBU_1212	306	hypothetical protein		536.653	787.274	214.833	211.463	0.552877	2.52587e-17		-1.87365	3.75611e-262	DOWN	-0.0228112	0.76561
LBU_1213	225	conserved hypothetical protein		1046.11	1732.8	384.303	473.604	0.728068	1.49295e-43		-2.17279	0	DOWN	0.301437	6.01059e-07
LBU_1214	195	peptide ABC transporter substrate-binding protein		505.279	862.459	258.697	194.856	0.771376	1.76198e-21		-1.7372	1.36546e-165	DOWN	-0.408849	4.97805e-06
LBU_1215	309	ABC-type oligopeptide transport system substrate-binding protein		134.126	157.029	86.7879	90.3995	0.227446	0.111503		-0.855468	3.94227e-17		0.0588204	0.617818
LBU_1216	1689	DNA repair protein RecN	K03631	197.694	151.849	277.259	187.213	-0.380627	1.78751e-12		0.868594	6.63534e-156		-0.566555	2.60167e-80
LBU_1217	816	hemolysin-like protein	K06442	155.246	155.969	207.491	122.175	0.0067074	0.942795		0.411784	3.09203e-16		-0.764093	6.46906e-50
LBU_1218	864	geranyltranstransferase	K13789	159.292	147.567	198.648	175.477	-0.1103	0.187751		0.428839	1.30104e-17		-0.178935	0.00013046
LBU_1219	264	putative exodeoxyribonuclease VII small subunit		245.85	127.839	376.4	312.438	-0.943446	2.80717e-12		1.55794	1.43778e-84	UP	-0.268697	1.61567e-05
LBU_1220	1371	exodeoxyribonuclease VII large subunit	K03601	114.645	132.615	195.077	135.213	0.210079	0.00362051		0.556792	5.69188e-42		-0.52881	2.97289e-41
LBU_1221	888	methylenetetrahydrofolate dehydrogenase(NADP+)/methenyltetrahydrofolate cyclohydrolasecyclohydrolase	K01491	250.973	241.602	410.147	335.325	-0.0549007	0.40845		0.763508	8.47801e-98		-0.29058	3.05382e-19
LBU_1222	399	N utilization substance protein B	K03625	1944.17	1136.06	1351.32	1349.73	-0.775111	5.63998e-95		0.250324	7.37738e-20		-0.00169829	0.947737
LBU_1223	435	conserved hypothetical protein		4884.23	5968.31	5309.34	5597.07	0.289193	4.49419e-53		-0.168789	6.88844e-43		0.0761379	3.14788e-10
LBU_1224	570	translation elongation factor P	K02356	1570.82	1583.91	1739.13	1550.37	0.011974	0.721695		0.134875	1.15646e-11		-0.16575	6.53585e-18
LBU_1225	861	conserved hypothetical protein	K01262	115.344	70.2134	324.938	72.5326	-0.716128	9.01029e-12		2.21035	0	UP	-2.16346	0	DOWN
LBU_1226	309	50S ribosomal protein L27	K02899	4231.29	2754.82	7196.6	857.121	-0.619142	1.15565e-107		1.38536	0	UP	-3.06974	0	DOWN
LBU_1227	312	50S ribosomal protein L21	K02888	6371.13	6672.4	13849.4	1958.81	0.066658	0.00131618		1.05355	0	UP	-2.82177	0	DOWN
LBU_1228	357	Arsenate reductase family protein	K00537	486.273	482.55	125.672	393.596	-0.0110874	0.887102		-1.94102	5.66152e-197	DOWN	1.64705	7.72182e-139	UP
LBU_1229	528	cystathionine beta/gamma-lyase		81.4562	55.3109	33.7689	68.2233	-0.558461	0.00037272		-0.711867	2.85703e-08		1.01457	3.90398e-18	UP
LBU_1230	156	cystathionine gamma-lyase-like protein		35.0888	335.077	54.3597	27.7333	3.25541	1.87519e-48	UP	-2.62388	3.71028e-87	DOWN	-0.97092	5.67788e-05
LBU_1231	357	ABC-type branched-chain amino acid transport system ATP-binding protein	K01996	15.3329	3.18305	22.5357	101.165	-2.26815	0.000122488	DOWN	2.82373	9.06079e-16	UP	2.16643	1.48662e-52	UP
LBU_1232	1266	phosphoribosylamine-glycine ligase	K01945	1355.18	358.677	2692.4	1360.34	-1.91773	0	DOWN	2.90813	0	UP	-0.984927	0
LBU_1233	1542	phosphoribosylaminoimidazolecarboxamide formyltransferase/IMP cyclohydrolase	K00602	1368.21	347.832	2951.69	1639.14	-1.97583	0	DOWN	3.08508	0	UP	-0.848602	0
LBU_1234	582	phosphoribosylglycinamide formyltransferase	K11175	736.297	200.13	1917.97	986.9	-1.87935	1.357e-208	DOWN	3.26057	0	UP	-0.958606	0
LBU_1235	1044	phosphoribosylformylglycinamide cyclo-ligase	K01933	1978.17	297.366	3481.38	2083.02	-2.73385	0	DOWN	3.54935	0	UP	-0.740986	0
LBU_1236	1479	amidophosphoribosyltransferase	K00764	1004.04	219.663	2566.44	1615.74	-2.19245	0	DOWN	3.5464	0	UP	-0.667575	0
LBU_1237	2223	phosphoribosylformylglycinamidine synthetase I	K01952	1040.18	161.072	2362.94	1498.4	-2.69105	0	DOWN	3.8748	0	UP	-0.65716	0
LBU_1238	675	phosphoribosylformylglycinamidine synthase I	K01952	2406.18	381.813	4580.28	3094.1	-2.65581	0	DOWN	3.5845	0	UP	-0.565916	0
LBU_1239	276	phosphoribosylformylglycinamidine synthase PurS component	K01952	3125.08	416.249	4937.02	3825.46	-2.90838	0	DOWN	3.56812	0	UP	-0.368006	3.33423e-105
LBU_1240	723	phosphoribosylaminoimidazole-succinocarboxamide synthase	K01923	1531.51	258.39	3709.19	2555.92	-2.56734	0	DOWN	3.84349	0	UP	-0.53726	0
LBU_1241	1296	adenylosuccinate lyase	K01756	2486.53	915.918	3204.26	6273.91	-1.44084	0	DOWN	1.8067	0	UP	0.969373	0
LBU_1242	1134	phosphoribosylaminoimidazole carboxylase ATPase subunit	K01589	1532.93	846.65	2923.86	5840.35	-0.856453	1.63097e-250		1.78804	0	UP	0.998181	0
LBU_1243	492	phosphoribosylaminoimidazole carboxylase I	K01588	2541.43	1196.4	4668.16	8900.53	-1.08694	9.45571e-268	DOWN	1.96416	0	UP	0.931037	0
LBU_1244	255	transcriptional regulator		3.06659	11.5863	6.82161	1.84416	1.91771	0.0120828		-0.764234	0.0635138		-1.88715	0.00263133
LBU_1245	408	permease		3.83323	3.89923	15.0999	3.91883	0.0246293	0.976721		1.95328	1.68771e-08	UP	-1.94605	5.2893e-09	DOWN
LBU_1246	558	permease		18.2182	24.4376	15.587	3.20249	0.423725	0.128932		-0.648757	0.000506606		-2.28308	1.39434e-14	DOWN
LBU_1247	1218	hypothetical protein		460.328	279.609	829.588	769.481	-0.719252	9.13425e-61		1.56899	0	UP	-0.10851	9.8304e-09
LBU_1248	1812	hypothetical protein		778.959	493.107	973.995	1309.36	-0.659645	8.1327e-130		0.982013	0		0.426872	1.2373e-239
LBU_1249	2139	DNA topoisomerase III	K03169	85.5461	305.523	139.877	32.9776	1.83651	0	UP	-1.12713	0	DOWN	-2.0846	0	DOWN
LBU_1250	2379	X-prolyl dipeptidyl peptidase	K01281	250.799	244.37	259.208	161.023	-0.0374643	0.351856		0.0850465	0.000723063		-0.686845	9.37514e-148
LBU_1251	1383	permease of the major facilitator superfamily		11.8739	17.2547	7.5991	1.76815	0.539202	0.0108247		-1.18309	1.30095e-14	DOWN	-2.10359	8.66368e-16	DOWN
LBU_1252	783	homoserine O-succinyltransferase		52.9309	53.9874	47.1164	42.4015	0.0285127	0.859104		-0.196394	0.0463025		-0.152115	0.136572
LBU_1253	924	cysteine synthase	K01738	112.558	102.075	68.3223	59.2405	-0.141041	0.143241		-0.579196	7.93252e-17		-0.205771	0.00833655
LBU_1254	1182	cyclopropane-fatty-acyl-phospholipid synthase	K00574	251.398	323.696	139.134	70.8175	0.364667	4.03883e-13		-1.21816	3.524e-221	DOWN	-0.974297	1.48662e-72
LBU_1255	1086	conserved hypothetical protein		113.049	147.223	65.6722	34.2086	0.38106	1.20956e-06		-1.16465	4.22336e-87	DOWN	-0.940923	1.36641e-30
LBU_1256	993	putative adenosine deaminase	K01488	274.047	307.833	551.882	64.9745	0.167721	0.00239221		0.842214	6.28355e-173		-3.08641	0	DOWN
LBU_1257	342	HIRAN domain-containing protein		52.5893	21.5973	19.2855	18.1504	-1.28392	2.7301e-06	DOWN	-0.16333	0.49375		-0.0875178	0.722734
LBU_1258	933	conserved hypothetical protein		72.9177	76.4873	83.8993	29.4354	0.0689516	0.565957		0.133438	0.0629256		-1.51111	4.77824e-69	DOWN
LBU_1259	372	hypothetical protein		67.267	21.9938	47.9301	10.8716	-1.6128	4.15608e-11	DOWN	1.12383	1.74538e-10	UP	-2.14037	2.47393e-26	DOWN
LBU_1260	1221	major facilitator family transporter		87.1001	66.2637	166.804	128.099	-0.394455	4.51495e-05		1.33186	5.71662e-136	UP	-0.380899	5.14774e-18
LBU_1261	1338	glutamine-ammonia ligase	K01915	1284.01	466.514	1766.92	4883.18	-1.46067	0	DOWN	1.92124	0	UP	1.46658	0	UP
LBU_1262	429	conserved hypothetical protein		83.8486	143.037	113.366	108.522	0.770528	1.19846e-08		-0.335404	5.48964e-05		-0.0630015	0.478571
LBU_1263	591	conserved hypothetical protein		113.791	177.663	97.498	148.319	0.642759	1.88589e-10		-0.865695	5.11039e-36		0.605258	4.2025e-18
LBU_1264	891	tRNA delta(2)-isopentenylpyrophosphate transferase	K00791	224.676	313.484	172.373	262.522	0.480544	1.08868e-15		-0.862859	1.23423e-92		0.606906	4.59598e-46
LBU_1265	402	rhodanese-like domain protein		344.304	137.662	287.214	175.002	-1.32255	1.41308e-41	DOWN	1.061	9.9176e-55	UP	-0.714753	6.80068e-31
LBU_1266	228	hypothetical protein		312.106	150.018	413.579	128.29	-1.0569	8.05867e-16	DOWN	1.46303	2.31884e-73	UP	-1.68875	5.17019e-97	DOWN
LBU_1267	672	putative membrane protein	K01362	37.2371	105.349	159.304	44.5068	1.50036	3.02331e-26	UP	0.596608	7.41367e-20		-1.83969	1.29608e-123	DOWN
LBU_1268	573	5-formyltetrahydrofolate cyclo-ligase family protein	K01934	19.106	76.9464	70.2028	21.5023	2.00983	1.14666e-24	UP	-0.132326	0.168565		-1.70704	6.62969e-43	DOWN
LBU_1269	2115	penicillin-binding protein	K00687	440.718	716.947	578.706	359.488	0.702009	2.22881e-155		-0.309035	1.66686e-78		-0.686889	7.7756e-292
LBU_1270	2670	putative membrane protein		32.2164	35.9631	31.6793	17.0491	0.158722	0.113693		-0.182976	0.00487885		-0.893843	3.81323e-33
LBU_1271	489	putative transcription elongation factor GreA	K03624	671.639	689.013	710.567	341.972	0.0368453	0.497325		0.0444405	0.187441		-1.05509	1.34515e-172	DOWN
LBU_1272	2412	phenylalanyl-tRNA synthetase beta subunit	K01890	336.523	300.812	548.736	213.45	-0.161845	1.3878e-06		0.86725	0		-1.36222	0	DOWN
LBU_1273	1050	phenylalanyl-tRNA synthetase alpha subunit	K01889	286.726	296.641	560.647	210.676	0.0490464	0.380708		0.918375	1.09527e-214		-1.41206	0	DOWN
LBU_1274	351	MarR family transcriptional regulator		376.509	843.358	488.154	550.378	1.16346	1.0949e-71	UP	-0.788811	2.48514e-84		0.173089	8.43727e-05
LBU_1275	765	TrmH family RNA methyltransferase	K03437	280.082	163.991	429.951	115.198	-0.772233	4.80099e-27		1.39056	2.76788e-233	UP	-1.90005	0	DOWN
LBU_1276	300	acyltransferase family protein	K01512	211.134	338.253	99.5387	205.033	0.679941	4.55668e-11		-1.76477	8.87173e-103	DOWN	1.04253	3.09705e-31	UP
LBU_1277	963	preprotein translocase subunit YidC	K03217	380.027	526.166	466.865	494.774	0.469414	2.72362e-26		-0.172511	7.33857e-10		0.0837637	0.00252014
LBU_1278	1593	two-component system sensor histidine kinase		381.908	363.161	514.364	303.293	-0.0726186	0.062938		0.502183	3.91802e-104		-0.76208	1.51923e-234
LBU_1279	714	two-component system response regulator		676.839	681.013	753.118	638.605	0.00886932	0.850547		0.145194	8.39398e-08		-0.237952	2.16368e-19
LBU_1280	579	DNA-binding protein	K07040	530.774	746.379	422.36	432.249	0.491811	1.61762e-24		-0.821435	4.55304e-131		0.0333913	0.389852
LBU_1281	1155	nucleotidyltransferase		265.399	442.831	362.586	339.483	0.738594	4.01351e-58		-0.288433	2.54811e-24		-0.0949861	0.00132879
LBU_1282	348	hypothetical protein	K09710	597.72	675.605	486.738	489.719	0.17671	0.00516196		-0.473033	5.94817e-28		0.00880796	0.853153
LBU_1283	594	putative metal dependent phosphohydrolase		685.878	995.931	537.008	635.722	0.538094	1.02708e-38		-0.891101	3.957e-205		0.243451	1.3395e-14
LBU_1284	639	nicotinate-nucleotide adenylyltransferase	K00969	291.254	505.577	324.173	333.082	0.795655	3.815e-42		-0.641165	2.13233e-64		0.0391134	0.353114
LBU_1285	1137	GTP-binding protein	K06948	599.036	922.171	595.073	689.715	0.622391	2.06718e-87		-0.631969	3.62168e-200		0.212934	1.36565e-22
LBU_1286	357	ribosomal protein L20	K02887	3160.77	1463.25	3662.56	367.514	-1.1111	1.9098e-250	DOWN	1.32368	0	UP	-3.31698	0	DOWN
LBU_1287	201	50S ribosomal protein L35	K02916	4267.82	4566.31	11337.1	1087.91	0.0975304	0.00193661		1.31195	0	UP	-3.38142	0	DOWN
LBU_1288	522	translation initiation factor IF-3	K02520	4679.89	6033.53	9886.95	792.415	0.366527	1.75401e-99		0.712522	0		-3.6412	0	DOWN
LBU_1289	1599	transposase		238.164	524.966	169.119	149.989	1.14027	1.69249e-194	UP	-1.63418	0	DOWN	-0.173182	3.06248e-06
LBU_1290	1401	ATPase	K06921	54.1413	130.181	40.9735	21.348	1.26572	7.26793e-51	UP	-1.66776	1.66964e-169	DOWN	-0.940591	6.73062e-25
LBU_1291	1932	threonyl-tRNA synthetase 1	K01868	519.296	460.421	1007.96	882.735	-0.173603	8.30751e-09		1.13042	0	UP	-0.191389	3.52221e-44
LBU_1292	924	DNA replication protein DnaI	K11144	308.053	487.867	219.322	209.887	0.663312	9.0307e-43		-1.15344	8.2716e-239	DOWN	-0.0634373	0.139484
LBU_1293	1335	chromosome replication initiation/membrane attachment protein DnaB	K03346	483.246	858.007	325.751	374.306	0.828232	2.56114e-156		-1.39722	0	DOWN	0.200447	2.02746e-13
LBU_1294	468	ATP cone domain protein	K07738	185.469	289.429	167.106	184.889	0.642027	4.43638e-13		-0.792447	9.13316e-40		0.145894	0.0273393
LBU_1295	585	dephospho-CoA kinase	K00859	136.345	222.802	89.7013	91.6404	0.708499	8.66143e-15		-1.31256	1.05475e-85	DOWN	0.030855	0.718799
LBU_1296	822	formamidopyrimidine-DNA glycosylase	K10563	188.36	325.421	141.697	155.495	0.788816	1.25214e-34		-1.1995	1.85448e-151	DOWN	0.134058	0.0133311
LBU_1297	2661	DNA-directed DNA polymerase I	K02335	171.03	320.834	145.313	208.675	0.907572	2.95038e-136		-1.14266	0	DOWN	0.522087	4.30946e-82
LBU_1298	273	MFS transporter		0	9.15739	4.51338	1.37805	2.67671	0.00460209		-1.02073	0.0288517		-1.71158	0.0183611		RPKM<10	pseudogene
LBU_1299	663	putative drug resistance protein		5.89728	5.31324	6.23128	3.68831	-0.150457	0.777071		0.229936	0.475625		-0.756568	0.0244942		RPKM<10
LBU_1300	315	putative drug resistance protein		2.48247	0	7.8232	2.09004	0	0		5.43871	5.67654e-08	UP	-1.90423	0.000302635	DOWN	RPKM<10
LBU_1301	828	transposase		89.7199	93.3233	172.095	132.332	0.0568097	0.623818		0.882899	6.72009e-50		-0.379051	6.45265e-13
LBU_1302	384	conserved hypothetical protein		65.165	134.054	124.008	72.7433	1.04064	1.52984e-11	UP	-0.112375	0.20521		-0.769548	2.96306e-15
LBU_1303	1089	AraC family transcriptional regulator		16.5156	4.38261	7.38773	6.04558	-1.91397	3.00844e-10	DOWN	0.753341	0.00235462		-0.28925	0.197349
LBU_1304	1320	UDP-N-acetylmuramate-alanine ligase	K01924	296.204	179.577	269.932	174.21	-0.721986	4.69896e-43		0.587988	6.15121e-61		-0.631768	2.11773e-74
LBU_1305	648	putative phenylalanyl-tRNA synthetase (beta subunit)	K06878	1321.4	1463.93	816.067	951.261	0.147774	1.78952e-06		-0.843082	1.17066e-298		0.221153	2.54571e-19
LBU_1306	321	thioredoxin		628.507	867.306	247.469	364.781	0.464613	8.72819e-15		-1.80929	1.05349e-288	DOWN	0.559781	8.75641e-21
LBU_1307	657	methlytransferase	K03439	121.403	139.233	88.3656	119.247	0.197694	0.0545849		-0.655944	4.48475e-20		0.432397	1.79495e-09
LBU_1308	1218	ABC-type transport system permease protein	K01992	34.669	56.7241	45.5229	81.3882	0.710314	1.77088e-08		-0.317369	4.846e-05		0.838226	9.43569e-35
LBU_1309	741	ABC-type transport system ATP-binding protein	K01990	90.756	140.932	148.089	266.925	0.634931	3.29283e-10		0.0714712	0.236765		0.849966	2.06582e-69
LBU_1310	438	HIT family protein	K02503	207.1	229.864	160.183	451.364	0.150456	0.124467		-0.521057	5.30034e-15		1.49457	3.16608e-169	UP
LBU_1311	351	hypothetical protein		162.634	130.146	95.4006	267.686	-0.321498	0.0148465		-0.44806	5.01187e-06		1.48847	9.11908e-81	UP
LBU_1312	930	dihydroorotate dehydrogenase	K00226	216.095	86.9978	70.2195	146.135	-1.31262	4.4198e-59	DOWN	-0.309107	1.78469e-05		1.05735	1.06052e-68	UP
LBU_1313	723	orotidine 5-phosphate decarboxylase	K01591	120.055	344.834	96.84	108.752	1.52221	6.77909e-91	UP	-1.83223	3.50254e-263	DOWN	0.167362	0.0160435
LBU_1314	624	orotate phosphoribosyltransferase	K00762	92.7347	186.842	58.4251	70.9912	1.01064	2.15034e-23	UP	-1.67716	8.01581e-110	DOWN	0.281051	0.00282695
LBU_1315	924	putative peptidylprolyl isomerase	K07533	1448.86	1395.96	2152.11	1408.95	-0.0536608	0.0400125		0.624493	0		-0.611135	0
LBU_1316	201	3-phosphoshikimate 1-carboxyvinyltransferase	K00800	11.6713	19.7872	10.4573	0.46792	0.761595	0.166636		-0.920059	0.0113904		-4.4821	4.39079e-07	DOWN
LBU_1317	234	3-phosphoshikimate 1-carboxyvinyltransferase	K00800	43.4433	95.1813	21.3722	2.41159	1.13154	2.31956e-06	UP	-2.15494	1.58419e-30	DOWN	-3.14768	4.49639e-12	DOWN
LBU_1318	405	putative shikimate kinase	K00891	3.86163	7.29508	19.6858	3.94786	0.917714	0.161801		1.43216	2.65968e-07	UP	-2.31801	1.0523e-13	DOWN
LBU_1319	951	HD superfamily hydrolase	K03698	263.127	414.032	209.894	168.226	0.653986	1.24516e-36		-0.980084	1.6515e-160		-0.319263	4.38341e-13
LBU_1320	2427	DNA repair ATPase		296.746	489.608	272	215.463	0.722398	3.00791e-128		-0.84802	0		-0.336167	6.69531e-44
LBU_1321	1206	phosphoesterase		162.102	242.157	190.214	176.796	0.579043	2.08146e-22		-0.34832	4.16945e-20		-0.105538	0.0086705
LBU_1322	354	hypothetical protein		300.421	404.463	353.799	414.998	0.42902	2.83488e-07		-0.193078	0.000283809		0.230174	6.06185e-06
LBU_1323	2088	penicillin-binding protein	K12555	49.4355	72.3823	68.696	76.8001	0.550091	2.92376e-11		-0.0754119	0.141992		0.160883	0.000878803
LBU_1324	849	ribosomal large subunit pseudouridine synthase	K06180	21.1844	47.2475	39.0144	16.3954	1.15724	8.8137e-11	UP	-0.276231	0.00692254		-1.25071	6.20243e-23	DOWN
LBU_1325	912	fructose-bisphosphate aldolase	K01624	8227.93	7039.88	4182.04	6354.18	-0.22498	2.87453e-94		-0.751342	0		0.603498	0
LBU_1326	513	hypothetical protein		65.546	48.7323	49.4501	48.401	-0.427631	0.0146305		0.0210941	0.868367		-0.0309343	0.803242
LBU_1327	321	hypothetical protein		306.945	219.128	44.4813	50.3955	-0.48621	1.80686e-06		-2.3005	1.38525e-100	DOWN	0.180096	0.24798
LBU_1328	276	hypothetical protein		359.824	630.344	71.6918	138.011	0.808848	6.03389e-24		-3.13626	0	DOWN	0.944904	4.00443e-17
LBU_1329	393	hypothetical protein		718.307	852.406	92.3977	240.036	0.24694	3.16753e-06		-3.20561	0	DOWN	1.37732	2.49177e-72	UP
LBU_1330	411	conserved hypothetical protein		239.731	377.124	57.6663	86.7292	0.653622	3.2544e-15		-2.70924	5.93349e-264	DOWN	0.58879	7.89053e-08
LBU_1331	435	transposase		819.73	1311.11	159.455	462.693	0.677569	9.14615e-56		-3.03957	0	DOWN	1.5369	2.00713e-179	UP
LBU_1332	192	hypothetical protein		20.364	24.8576	6.41747	5.87825	0.287664	0.550041		-1.95361	7.03771e-07	DOWN	-0.126618	0.824881
LBU_1333	1542	conserved hypothetical protein		3974.81	5742.39	1065.9	2658.46	0.530766	0		-2.42958	0	DOWN	1.31852	0	UP
LBU_1334	867	putative sugar kinase of P-loop ATPase superfamily	K17758	886.604	1651.83	366.495	719.438	0.897706	1.256e-223		-2.1722	0	DOWN	0.973079	2.78597e-270
LBU_1335	1287	D-alanyl-D-alanine carboxypeptidase	K07258	424.104	530.561	170.358	319.28	0.3231	4.18719e-18		-1.63895	0	DOWN	0.906251	1.04298e-158
LBU_1336	519	pyruvate oxidase		75.3352	47.2931	129.179	29.1761	-0.671694	5.99442e-05		1.44966	6.19631e-52	UP	-2.14651	4.04101e-95	DOWN
LBU_1337	333	pyruvate oxidase		9.39315	45.7269	41.5724	32.7629	2.28336	8.77719e-11	UP	-0.137418	0.404426		-0.343565	0.0449058
LBU_1338	1164	membrane protein		124.955	123.593	97.1999	157.723	-0.0158227	0.854456		-0.346564	1.58416e-10		0.698365	2.29005e-46
LBU_1339	381	phosphoenolpyruvate synthase	K01007	69.7829	62.6334	5.51682	8.8868	-0.155943	0.425809		-3.50502	5.72495e-53	DOWN	0.687827	0.0619289
LBU_1340	846	phosphoenolpyruvate synthase	K01007	54.5352	81.5323	3.68395	4.11339	0.580184	2.74445e-06		-4.46805	2.88893e-174	DOWN	0.159071	0.64032
LBU_1341	348	phosphoenolpyruvate synthase	K01007	24.7177	58.1236	5.62342	2.70264	1.23358	1.42538e-06	UP	-3.3696	8.94294e-44	DOWN	-1.05708	0.040282
LBU_1342	336	phosphoenolpyruvate synthase		97.7474	100.107	10.1385	14.5557	0.0344103	0.848842		-3.30362	1.44933e-70	DOWN	0.521734	0.0801329
LBU_1343	1620	polysaccharide biosynthesis protein		218.665	96.2389	335.822	138.814	-1.18403	6.55594e-88	DOWN	1.80301	0	UP	-1.27455	0	DOWN
LBU_1344	2415	leucyl-tRNA synthetase	K01869	327.039	133.633	687.491	372.314	-1.29119	1.69817e-222	DOWN	2.36307	0	UP	-0.884823	0
LBU_1345	1035	transposase	K07482	164.707	150.745	224.372	159.661	-0.127794	0.087131		0.573785	1.3181e-38		-0.490877	1.23519e-31
LBU_1346	660	membrane-associated phospholipid phosphatase		0	8.43653	12.5192	1.28253	3.83198	5.3807e-07	UP	0.569423	0.0164878		-3.28708	9.97272e-20	DOWN
LBU_1347	1449	multidrug transporter		93.9023	126.261	104.043	15.5131	0.427176	6.94396e-09		-0.279234	4.18275e-09		-2.74562	3.49756e-281	DOWN
LBU_1348	1197	S-adenosylmethionine synthetase	K00789	257.393	560.105	621.133	92.3234	1.12172	1.42064e-151	UP	0.149205	9.1038e-11		-2.75013	0	DOWN
LBU_1349	984	thioredoxin reductase	K00384	75.496	130.38	181.273	165.26	0.788249	2.75422e-17		0.475442	9.27637e-22		-0.133424	0.00353838
LBU_1350	660	putative membrane-associated protein	K03975	80.5676	65.7705	120.69	78.5192	-0.29276	0.0320869		0.87579	3.25903e-28		-0.620184	2.97244e-17
LBU_1351	606	membrane protein		65.8102	62.4429	34.685	58.6661	-0.0757726	0.63876		-0.848227	1.71227e-13		0.758216	1.77225e-11
LBU_1352	771	HAD superfamily sugar phosphatase	K01101	153.15	241.714	115.911	120.523	0.65835	3.03301e-18		-1.06028	3.05895e-87	DOWN	0.0562929	0.378922
LBU_1353	561	hypothetical protein		79.4525	163.261	80.8775	112.829	1.03902	1.76848e-19	UP	-1.01337	1.08746e-40	DOWN	0.480327	2.58902e-09
LBU_1354	1413	putative UDP-sugar hydrolase		175.987	216.091	137.316	231.835	0.296172	1.15501e-07		-0.654136	4.19591e-63		0.755596	2.58719e-93
LBU_1355	333	hypothetical protein		129.156	568.174	171.078	349.941	2.13722	1.44426e-109	UP	-1.73168	2.92966e-185	DOWN	1.03246	6.3399e-57	UP
LBU_1356	1002	catabolite control protein A	K02529	2465.34	3191.07	360.952	476.173	0.372254	6.48682e-104		-3.14417	0	DOWN	0.399682	7.18763e-44
LBU_1357	1107	Xaa-Pro dipeptidase	K01271	597.61	487.182	877.678	1020.81	-0.294743	5.52836e-15		0.84923	0		0.217948	2.66154e-33
LBU_1358	369	hypothetical protein		5162.34	4629.46	1300.31	2112.98	-0.157179	4.57902e-13		-1.83199	0	DOWN	0.700424	6.92834e-193
LBU_1359	420	conserved hypothetical protein		2128.1	3999.95	1016.1	1658.67	0.910414	2.14993e-268		-1.97694	0	DOWN	0.706994	2.52971e-175
LBU_1360	852	Mechanosensitive transport protein	K03442	376.305	815.717	392.598	665.76	1.11617	7.69428e-156	UP	-1.05502	0	DOWN	0.761949	8.5768e-163
LBU_1361	621	ribonuclease PH/Ham1 protein	K02428	2397.57	1538.55	795.292	1278.86	-0.639996	8.58523e-130		-0.952018	0		0.685307	4.20324e-189
LBU_1362	396	hydrocarbon binding protein, v4r domain		90.836	118.226	110.916	90.4894	0.380213	0.00966055		-0.0920838	0.322508		-0.293644	0.00192174
LBU_1363	312	thioredoxin	K03671	4784.61	4199.03	1241.68	2895.72	-0.188347	2.15783e-14		-1.75776	0	DOWN	1.22163	0	UP
LBU_1364	2364	DNA mismatch repair protein	K07456	169.363	235.538	223.51	449.333	0.47584	1.87987e-29		-0.0756202	0.00429983		1.00745	0	UP
LBU_1365	324	YrzB family protein		1001.61	483.299	431.522	537.606	-1.05133	8.23574e-67	DOWN	-0.16348	0.00124634		0.317114	1.82504e-11
LBU_1366	429	Conserved hypothetical protein	K07447	2451.66	2659.69	1735.96	2915.17	0.117499	2.91911e-05		-0.615522	9.08958e-208		0.747845	0
LBU_1367	258	hypothetical protein		3427.98	2502.17	2193.77	2626.89	-0.45418	2.49414e-42		-0.189764	2.21291e-14		0.259944	3.1521e-28
LBU_1368	2634	alanyl-tRNA synthetase	K01872	541.804	409.543	1142.61	1206.96	-0.403758	1.49939e-54		1.48025	0	UP	0.0790459	7.80268e-14
LBU_1369	1362	RNA helicase		269.846	441.691	536.839	204.608	0.7109	8.21891e-64		0.281453	1.23037e-32		-1.39163	0	DOWN
LBU_1370	960	DHH family phosphoesterase	K06881	193.051	436.31	441.899	200.938	1.17637	1.24083e-102	UP	0.0183629	0.551112		-1.13697	2.97023e-237	DOWN
LBU_1371	1116	DNA-damage-inducible protein P	K02346	227.026	380.717	307.389	408.654	0.745861	2.52197e-49		-0.308655	4.69518e-23		0.410815	4.04068e-44
LBU_1372	1449	glucose-6-phosphate 1-dehydrogenase	K00036	289.802	379.881	443.231	533.221	0.390479	1.27254e-20		0.222513	6.01299e-19		0.266674	1.69927e-33
LBU_1373	396	preprotein translocase YajC subunit		639.801	490.696	797.642	605.4	-0.382795	7.09563e-10		0.700913	1.82957e-73		-0.397852	2.60078e-29
LBU_1374	1011	Holliday junction DNA helicase RuvB	K03551	53.3695	76.4309	115.208	126.612	0.518141	7.6085e-06		0.592006	3.38296e-21		0.13618	0.0118772
LBU_1375	594	Holliday junction DNA helicase RuvA	K03550	72.4055	95.8435	74.432	107.036	0.404581	0.00241117		-0.364759	2.60407e-05		0.524097	9.83049e-11
LBU_1376	1962	DNA mismatch repair protein HexB	K03572	94.8579	149.428	103.178	93.0453	0.655612	9.75804e-28		-0.534313	1.13497e-42		-0.149133	0.000511477
LBU_1377	2571	DNA mismatch repair protein	K03555	69.9554	197.082	102.954	101.259	1.49429	2.04882e-178	UP	-0.936791	3.10347e-191		-0.0239601	0.525728
LBU_1378	1614	chaperonin GroEL	K04077	19626.5	36716.9	4178.18	4201.51	0.903638	0		-3.1355	0	DOWN	0.00803541	0.275829
LBU_1379	285	chaperonin GroES	K04078	38454.2	71071.6	7463.62	8252.82	0.886133	0		-3.25133	0	DOWN	0.14501	1.37079e-31
LBU_1380	684	putative DNA binding protein	K01926	314.392	262.988	95.368	62.5638	-0.257568	0.000107044		-1.46342	1.72938e-138	DOWN	-0.608176	6.19325e-14
LBU_1381	1917	ABC-type transport system ATP-binding protein	K06158	114.217	138.354	126.13	50.8283	0.27658	3.8664e-06		-0.133443	0.00056309		-1.31121	9.36066e-170	DOWN
LBU_1382	1041	O-sialoglycoprotein endopeptidase	K01409	212.584	138.741	215.629	337.087	-0.615636	3.6888e-19		0.63615	1.25826e-44		0.644574	6.68594e-76
LBU_1383	531	ribosomal-protein-alanine acetyltransferase	K03789	266.55	311.372	383.828	756.313	0.224232	0.00312457		0.30182	2.304e-11		0.978522	3.60514e-176
LBU_1384	723	glycoprotein endopeptidase	K14742	975.582	1089.51	830.559	2326.45	0.159347	2.82868e-06		-0.391527	6.94544e-64		1.48598	0	UP
LBU_1385	531	membrane protein		556.663	585.294	601.677	1562.93	0.0723571	0.191229		0.0398261	0.258244		1.37719	0	UP
LBU_1386	531	membrane protein		499.23	541.852	592.395	1803.28	0.118195	0.0381547		0.12866	0.000288085		1.606	0	UP
LBU_1387	750	Acyl-ACP thioesterase	K01071	331.559	310.602	274.07	420.224	-0.0942004	0.126832		-0.180524	1.37174e-05		0.616617	2.93643e-63
LBU_1388	864	putative methyltransferase	K07056	352.072	270.277	261.9	495.188	-0.381429	1.60734e-11		-0.0454251	0.271054		0.918962	4.63413e-169
LBU_1389	360	initiation-control protein YabA		716.814	770.507	655.538	1229.47	0.104209	0.0733184		-0.233129	1.11287e-09		0.907283	3.79198e-171
LBU_1390	873	DNA polymerase III delta subunit	K02341	327.84	500.878	350.277	699.626	0.611468	4.11328e-36		-0.515965	4.27189e-59		0.998089	5.38707e-276
LBU_1391	327	hypothetical protein		506.971	538.984	379.909	770.824	0.0883369	0.232179		-0.504589	8.03054e-24		1.02075	4.39638e-119	UP
LBU_1392	639	thymidylate kinase	K00943	216.605	122.704	253.735	423.308	-0.819879	9.34382e-20		1.04814	9.95108e-75	UP	0.738381	2.37878e-74
LBU_1393	237	hypothetical protein		227.665	84.387	80.7368	128.974	-1.43182	4.76522e-19	DOWN	-0.0637948	0.658646		0.675785	1.8482e-08
LBU_1394	600	recombination protein RecR	K06187	445.728	568.742	546.134	708.839	0.351611	3.81488e-11		-0.0585198	0.0847885		0.376202	3.09685e-35
LBU_1395	330	hypothetical protein	K09747	781.979	554.056	576.982	649.814	-0.497099	1.90338e-15		0.0584946	0.200487		0.1715	3.97941e-05
LBU_1396	1821	DNA polymerase III gamma and tau subunits	K02343	85.8846	104.898	148.342	50.0991	0.288522	4.63379e-05		0.499938	3.96722e-35		-1.56608	6.2668e-247	DOWN
LBU_1397	510	cytidine-deoxycytidylate deaminase	K11991	130.33	186.272	68.5004	56.4312	0.515243	7.6122e-07		-1.44323	1.94181e-72	DOWN	-0.279619	0.00846689
LBU_1398	603	16S RNA G1207 methylase RsmC	K00564	101.152	373.506	62.5032	79.7024	1.88461	1.10559e-110	UP	-2.57913	0	DOWN	0.350694	0.000117387
LBU_1399	531	pyrimidine operon regulatory protein/uracil phosphoribosyltransferase	K02825	241.515	317.15	117.523	111.056	0.393052	2.84615e-07		-1.43222	1.08448e-125	DOWN	-0.0816651	0.295942
LBU_1400	2868	hypothetical protein		101.156	184.875	42.2798	59.8155	0.86997	2.35143e-79		-2.12851	0	DOWN	0.500551	1.44197e-24
LBU_1401	279	hypothetical protein		1903.1	493.232	112.486	252.154	-1.94801	8.66801e-271	DOWN	-2.13252	6.63892e-178	DOWN	1.16455	3.55157e-42	UP
LBU_1402	165	transposase IS1223		4.73927	19.2835	6.58906	6.27013	2.02463	0.00686313		-1.54922	0.000601776	DOWN	-0.0715762	0.904077
LBU_1403	156	glycoside hydrolase		0	1.45686	4.64613	2.41159	0	0		1.67317	0.0860649		-0.946045	0.261017		RPKM<10	pseudogene
LBU_1404	1119	putative penicillin-binding protein		366.182	197.008	664.494	492.785	-0.894308	1.62767e-64		1.754	0	UP	-0.431296	1.59267e-77
LBU_1405	1128	putative penicillin-binding protein		385.444	176.9	574.633	516.786	-1.12359	4.91598e-99	DOWN	1.69971	0	UP	-0.153073	1.2323e-10
LBU_1406	273	nucleoid DNA-binding protein	K03530	1919.14	1027.29	664.529	435.12	-0.901616	3.07306e-83		-0.628441	3.31501e-54		-0.610921	1.78613e-36
LBU_1407	177	conserved hypothetical protein	K01808	636.187	869.916	149.054	283.75	0.451427	2.28814e-08		-2.54504	4.57065e-245	DOWN	0.928784	1.54687e-21
LBU_1408	486	thiamine biosynthesis membrane-associated lipoprotein		88.4956	119.714	71.8831	50.7029	0.435915	0.000987728		-0.735868	5.95928e-16		-0.503584	4.13918e-06
LBU_1409	234	FAD-binding domain protein		36.7597	19.9104	31.2839	20.0966	-0.884605	0.0183764		0.651902	0.0108307		-0.638473	0.00971683
LBU_1410	933	ABC-type oligopeptide transport system substrate-binding protein		25.9822	25.2116	23.0723	6.55239	-0.043435	0.83715		-0.127925	0.333111		-1.81607	1.19309e-25	DOWN
LBU_1411	501	ABC-type oligopeptide transport system substrate-binding protein		28.0951	42.8682	21.2665	9.57416	0.609592	0.00687971		-1.01133	1.29528e-10	DOWN	-1.15136	1.93911e-07	DOWN
LBU_1412	366	50S ribosomal protein L7/L12	K02935	4794.43	2386.95	6675.65	468.975	-1.00619	0	DOWN	1.48374	0	UP	-3.83133	0	DOWN
LBU_1413	510	50S ribosomal protein L10	K02864	5375.73	5465.84	13672.5	953.429	0.0239825	0.190264		1.32276	0	UP	-3.84201	0	DOWN
LBU_1414	855	transposase		1015.2	2232.16	309.162	405.469	1.13667	0	UP	-2.85201	0	DOWN	0.391229	4.37598e-31
LBU_1415	411	conserved hypothetical protein		696.361	1123.35	186.049	257.442	0.689904	7.87428e-47		-2.59406	0	DOWN	0.468565	4.55314e-14
LBU_1416	402	putative membrane protein		357.921	320.835	62.5633	56.8523	-0.157811	0.0525349		-2.35844	1.81393e-188	DOWN	-0.138097	0.266273
LBU_1417	1251	ammonium transporter	K03320	42.5057	43.0559	45.307	24.9602	0.0185548	0.895472		0.0735243	0.38382		-0.860103	2.33187e-21
LBU_1418	1005	putative glycosyltransferase		170.401	181.477	53.3681	60.2681	0.0908449	0.210859		-1.76573	1.63291e-183	DOWN	0.175418	0.0272233
LBU_1419	696	ribosomal protein L1	K02863	3282.97	3039.73	6626.78	6561.75	-0.111056	1.85593e-08		1.12437	0	UP	-0.0142287	0.109441
LBU_1420	426	ribosomal protein L11	K02867	9433.32	10599.2	18765.3	22842.7	0.168125	4.03073e-33		0.824102	0		0.28367	0
LBU_1421	555	transcription antitermination protein NusG	K02601	562.18	519.649	796.493	273.683	-0.113494	0.0380233		0.616123	1.24018e-81		-1.54116	0	DOWN
LBU_1422	171	preprotein translocase SecE subunit		818.563	404.699	435.726	114.402	-1.01624	4.64779e-28	DOWN	0.106569	0.14737		-1.9293	3.96691e-92	DOWN
LBU_1423	171	ribosomal protein L33	K02913	2720.92	1297.16	1509.78	287.106	-1.06873	9.46941e-98	DOWN	0.218977	3.21856e-08		-2.39468	0	DOWN
LBU_1424	369	1-deoxyxylulose-5-phosphate synthase	K01662	165.296	289.476	26.1241	131.775	0.808389	3.3515e-15		-3.46999	1.81682e-229	DOWN	2.33462	8.95317e-77	UP
LBU_1425	546	1-deoxyxylulose-5-phosphate synthase	K01662	124.601	129.868	26.2838	68.3858	0.0597331	0.621893		-2.3048	1.31826e-101	DOWN	1.37952	1.27975e-29	UP
LBU_1426	405	1-deoxyxylulose-5-phosphate synthase		146.742	122.613	20.9386	57.8246	-0.259164	0.0440223		-2.54988	2.33682e-80	DOWN	1.46552	8.22652e-21	UP
LBU_1427	300	1-deoxyxylulose-5-phosphate synthase		78.1979	39.3934	10.1472	14.1078	-0.989176	1.43525e-05		-1.95688	4.33215e-15	DOWN	0.475418	0.136283
LBU_1428	813	alpha/beta hydrolase		7.69475	13.9772	7.22122	2.89213	0.861131	0.00787234		-0.952763	9.24672e-06		-1.32011	1.77497e-05	DOWN
LBU_1429	216	hypothetical protein		251073	46097.9	6273.85	8424.62	-2.44534	0	DOWN	-2.87728	0	DOWN	0.42526	8.30255e-183
LBU_1430	570	RNA polymerase sigma-30 factor		179.718	268.736	168.356	164.839	0.580456	2.01181e-12		-0.674675	3.47806e-34		-0.0304638	0.630499
LBU_1431	750	tRNA/rRNA methyltransferase	K03218	56.3025	32.8783	61.4627	70.9779	-0.776062	2.09814e-06		0.902574	9.1566e-18		0.207658	0.0145865
LBU_1432	444	ribonuclease iii family protein	K11145	121.524	138.972	153.121	201.873	0.193558	0.124542		0.139878	0.0696119		0.398771	2.40486e-09
LBU_1433	1425	cysteinyl-tRNA synthetase	K01883	139.384	140.189	201.57	308.821	0.00830905	0.909164		0.523901	1.9815e-40		0.61549	1.98094e-87
LBU_1434	567	NUDIX family hydrolase		135.157	159.73	68.5169	135.355	0.241	0.0197971		-1.2211	8.03724e-54	DOWN	0.982219	3.98411e-35
LBU_1435	291	peptide ABC transporter substrate-binding protein		5.37443	27.7253	9.21563	31.6739	2.36702	1.58072e-06	UP	-1.58905	2.22008e-08	DOWN	1.78114	1.63188e-11	UP
LBU_1436	876	transcriptional regulator		33.0288	23.2199	10.5079	8.15976	-0.508363	0.00778729		-1.14389	4.54471e-12	DOWN	-0.364874	0.084576
LBU_1437	1026	AraC family transcriptional regulator		19.0541	8.6389	24.2305	14.5753	-1.14118	8.57369e-06	DOWN	1.48791	5.74933e-21	UP	-0.733299	5.09202e-08
LBU_1438	1503	glutamyl-tRNA synthetase	K01885	806.953	606.128	883.451	353.931	-0.412862	1.77397e-48		0.543528	1.86384e-193		-1.31968	0	DOWN
LBU_1439	837	ABC transporter permease		145.745	26.4741	242.984	72.0279	-2.4608	4.67858e-84	DOWN	3.19821	0	UP	-1.75424	1.02688e-218	DOWN
LBU_1440	699	ABC-type transport system ATP-binding protein	K01990	313.239	82.0967	455.409	153.793	-1.93187	3.20274e-111	DOWN	2.47177	0	UP	-1.56617	1.00833e-290	DOWN
LBU_1441	369	putative GntR family transcriptional regulator		470.459	149.665	887.237	335.427	-1.65233	1.41689e-71	DOWN	2.56758	0	UP	-1.40332	3.29393e-254	DOWN
LBU_1442	1611	ABC-type oligopeptide transport system substrate-binding protein	K15580	141.737	140.65	162.821	232.707	-0.0111005	0.871102		0.211168	7.43524e-08		0.515233	1.22955e-54
LBU_1443	525	NUDIX family hydrolase		86.3901	111.037	81.1772	137.226	0.362108	0.00573843		-0.4519	1.94664e-07		0.757411	8.76749e-22
LBU_1444	1221	biotin carboxylase		54.4376	42.5316	21.7261	13.2489	-0.356066	0.00364553		-0.969108	3.77549e-22		-0.713552	3.89183e-08
LBU_1445	1182	biotin carboxylase		15.8778	32.5907	13.9808	3.66023	1.03745	6.35148e-09	UP	-1.22101	8.75508e-24	DOWN	-1.93345	1.14127e-21	DOWN
LBU_1446	858	glucose-1-phosphate thymidylyltransferase	K00973	23.6963	31.3886	9.79911	11.2906	0.405578	0.0383977		-1.67952	1.20669e-26	DOWN	0.204402	0.313392
LBU_1447	1068	hypothetical protein		25.6267	75.4374	20.2916	7.66154	1.55763	2.77403e-31	UP	-1.8944	4.12758e-90	DOWN	-1.40518	2.87915e-18	DOWN
LBU_1448	726	putative ribokinase		12.9253	28.3304	18.669	15.0276	1.13216	5.69781e-06	UP	-0.601709	6.32358e-05		-0.313031	0.0699181
LBU_1449	1203	conserved hypothetical protein		1.95007	10.7684	6.92864	5.15996	2.4652	3.9008e-10	UP	-0.636157	0.000868043		-0.425213	0.0579265
LBU_1450	1122	Xaa-Pro dipeptidase	K01271	23.6963	53.0701	12.4029	10.1429	1.16323	1.73688e-15	UP	-2.09722	2.44042e-76	DOWN	-0.290217	0.0875042
LBU_1451	411	signal peptide protein		85.6182	49.4906	54.8447	28.6046	-0.790763	1.10059e-05		0.148198	0.273021		-0.939104	1.33505e-10
LBU_1452	417	C-di-GMP-specific phosphodiesterase		37.505	15.2603	29.8957	13.0816	-1.2973	1.06199e-05	DOWN	0.970153	2.37904e-06		-1.1924	6.72283e-09	DOWN
LBU_1453	618	C-di-GMP-specific phosphodiesterase		11.3881	20.0424	23.9253	27.8503	0.815534	0.00808839		0.255484	0.131315		0.219157	0.147832
LBU_1454	183	diguanylate cyclase (GGDEF) domain protein		4.27311	14.9029	14.2583	3.08367	1.80224	0.021086		-0.0637948	0.870045		-2.20908	4.11854e-05	DOWN
LBU_1455	504	membrane protein		184.634	153.317	80.1015	90.1332	-0.268152	0.00868781		-0.936615	1.60731e-30		0.170229	0.0642323
LBU_1456	1395	alcohol-acetaldehyde dehydrogenase	K04072	98.6583	112.576	10.5472	24.4737	0.190385	0.0143699		-3.41596	0	DOWN	1.21437	1.36406e-22	UP
LBU_1458	828	ABC-type transport system permease protein	K16785	43.4433	18.9391	57.9487	194.238	-1.19776	2.78234e-10	DOWN	1.61341	9.31048e-44	UP	1.74498	5.01999e-172	UP
LBU_1459	1719	ABC-type transport system ATP-binding protein	K16787	90.5258	53.9418	170.806	592.872	-0.746925	5.7837e-19		1.66288	1.08292e-270	UP	1.79537	0	UP
LBU_1460	561	membrane protein	K16924	296.901	246.108	745.985	2793.73	-0.270695	0.000358842		1.59986	0	UP	1.90497	0	UP
LBU_1461	852	DNA-directed RNA polymerase subunit delta	K09134	320.318	121.637	438.621	2305.49	-1.39692	1.44385e-87	DOWN	1.85039	0	UP	2.39403	0	UP
LBU_1462	1389	amino acid permease		211.681	172.866	431.277	558.218	-0.292237	2.85999e-07		1.31896	0	UP	0.372212	8.75984e-62
LBU_1463	1779	membrane protein		49.2309	99.0073	80.9947	39.7038	1.00797	1.64122e-34	UP	-0.289708	2.33581e-09		-1.02855	1.35936e-69	DOWN
LBU_1464	906	ABC-type transport system ATP-binding protein	K16921	105.3	243.449	153.279	91.872	1.20912	4.50946e-57	UP	-0.66746	1.21348e-47		-0.738465	6.29616e-39
LBU_1465	375	GntR family transcriptional regulator	K07979	173.078	259.39	107.077	87.7819	0.583702	1.97686e-08		-1.27648	1.00506e-61	DOWN	-0.286648	0.00379331
LBU_1466	171	hypothetical protein		54.8758	0.664531	3.81472	1.65004	-6.36769	2.47578e-12	DOWN	2.52117	0.03352		-1.20908	0.190604
LBU_1467	801	EAL domain-containing protein		12.6913	1.41866	4.79578	12.0941	-3.16124	2.96502e-10	DOWN	1.75724	3.57151e-05	UP	1.33446	2.42127e-08	UP
LBU_1468	378	phosphodiesterase		16.5498	3.90808	4.02665	20.154	-2.08229	9.86375e-05	DOWN	0.0431204	0.934344		2.32342	3.43594e-13	UP
LBU_1469	948	lipopolysaccharide biosynthesis glycosyltransferase		242.513	229.068	278.756	88.5954	-0.0822859	0.202106		0.28323	7.44602e-13		-1.6537	3.37734e-261	DOWN
LBU_1470	1377	putative DNA repair protein	K04485	81.7756	146.067	82.0594	40.6398	0.836883	4.7896e-29		-0.831886	3.34371e-63		-1.01378	1.17746e-53	DOWN
LBU_1471	555	deoxyuridine 5-triphosphate nucleotidohydrolase	K01520	235.298	176.492	135.295	72.3607	-0.414886	2.05423e-06		-0.383493	6.6914e-09		-0.902833	4.49495e-30
LBU_1472	303	hypothetical protein		77.4237	82.8822	94.9651	76.9799	0.0982863	0.63174		0.196335	0.101553		-0.302916	0.00993177
LBU_1473	1350	aminopeptidase C	K01372	1368.17	918.759	1889.03	2264.98	-0.574494	1.00791e-132		1.03989	0	UP	0.26185	6.37411e-124
LBU_1474	213	hypothetical protein		14.6851	8.53595	3.4028	28.2598	-0.782726	0.210607		-1.32683	0.0215444		3.05395	6.79249e-14	UP
LBU_1475	747	conserved hypothetical protein		1778.56	1866.53	2965.65	1071.59	0.0696519	0.00624741		0.667988	0		-1.4686	0	DOWN
LBU_1476	462	3-hydroxymyristoyl/3-hydroxydecanoyl-(acyl-carrier-protein) dehydratase	K02372	143.871	62.7205	261.837	46.6188	-1.19776	6.83397e-18	DOWN	2.06166	4.49121e-150	UP	-2.48968	3.52013e-203	DOWN
LBU_1477	678	phosphoglycerate mutase		38.0609	112.797	91.722	40.7836	1.56734	5.05403e-30	UP	-0.298386	5.52815e-05		-1.16928	1.09237e-37	DOWN
LBU_1478	186	hypothetical protein		231.23	175.951	257.576	80.9049	-0.39416	0.0103383		0.549824	1.62911e-08		-1.6707	2.47417e-49	DOWN
LBU_1479	186	hypothetical protein		63.0629	109.358	121.189	78.3767	0.7942	0.000853415		0.148198	0.273021		-0.628764	6.25263e-06
LBU_1480	681	phosphoglycerate mutase	K15634	205.542	226.602	255.222	134.38	0.140726	0.0731085		0.171591	0.000360771		-0.925437	2.05823e-70
LBU_1481	804	membrane protein		5.83567	5.65347	10.1868	5.73202	-0.04576	0.923777		0.849494	0.000656641		-0.829586	0.000551237
LBU_1482	582	4-methyl-5(b-hydroxyethyl)-thiazole monophosphate biosynthesis protein	K03152	134.361	59.7461	39.6023	100.516	-1.16919	4.36676e-20	DOWN	-0.593262	2.62674e-07		1.34377	8.06512e-44	UP
LBU_1483	519	acetyltransferase		37.6676	123.05	36.3096	78.1048	1.70784	1.99106e-28	UP	-1.76082	4.25848e-65	DOWN	1.10506	4.88183e-23	UP
LBU_1484	1059	putative chloromuconate cycloisomerase		251.799	419.558	106.769	169.898	0.736599	1.93613e-50		-1.97438	0	DOWN	0.670174	2.15476e-42
LBU_1485	210	beta-lactamase		614.412	985.917	208.81	257.075	0.682259	2.39545e-21		-2.23927	2.31429e-283	DOWN	0.299998	0.000437504
LBU_1486	555	beta-lactamase		269.114	432.017	94.9418	122.861	0.682873	1.54106e-24		-2.18597	0	DOWN	0.371908	1.14907e-06
LBU_1487	756	transcriptional regulator		512.01	780.112	288.864	234.881	0.607508	1.04683e-47		-1.43329	0	DOWN	-0.298459	1.18313e-12
LBU_1488	1413	putative dipeptidase	K01439	921.441	1610.99	732.747	1078.77	0.805987	1.54773e-295		-1.13656	0	DOWN	0.557999	4.08793e-251
LBU_1489	300	amino acid transporter		7.81979	27.6511	6.03997	3.76208	1.82214	3.95462e-05	UP	-2.19473	1.57473e-12	DOWN	-0.683011	0.17715
LBU_1490	975	amino acid permease		2.40609	11.4218	5.57536	3.37623	2.24702	4.27783e-08	UP	-1.03465	2.5641e-06	DOWN	-0.723653	0.0128604
LBU_1491	222	DeoR family transcriptional regulator		49.314	11.773	13.7124	29.2324	-2.06652	2.62146e-07	DOWN	0.219998	0.559004		1.09209	0.000106271	UP
LBU_1492	1368	aspartate ammonia-lyase	K01744	104.035	38.7089	127.899	852.037	-1.42633	9.25177e-48	DOWN	1.72427	1.96636e-170	UP	2.73591	0	UP
LBU_1493	894	hypothetical protein		609.664	638.338	224.817	732.848	0.0663059	0.101349		-1.50557	0	DOWN	1.70477	0	UP
LBU_1494	891	aggregation promoting factor		2397.72	1622.39	6082.27	9864.8	-0.563543	3.7542e-148		1.90649	0	UP	0.69768	0
LBU_1495	864	homoserine kinase	K00872	141.191	188.208	149.321	422.907	0.41468	1.12388e-07		-0.333904	5.09723e-11		1.50192	0	UP
LBU_1496	1479	threonine synthase	K01733	227.879	238.794	295.652	478.845	0.0675011	0.193268		0.308132	1.3008e-23		0.695657	2.88346e-173
LBU_1497	531	acetyltransferase		82.4686	142.739	51.7322	41.2695	0.791462	8.21759e-11		-1.46425	2.31791e-59	DOWN	-0.325985	0.00690918
LBU_1498	597	membrane protein		28.8167	26.4577	25.7382	22.2133	-0.123216	0.620304		-0.0397779	0.805832		-0.212486	0.184679
LBU_1499	192	hypothetical protein		904.164	295.332	33.5973	77.397	-1.61425	2.89857e-69	DOWN	-3.13592	1.39096e-112	DOWN	1.20393	1.70726e-10	UP
LBU_1500	825	sucrose operon repressor	K03484	0	5.78505	5.71052	5.47212	3.60959	5.72547e-06	UP	-0.0187069	0.949687		-0.0615226	0.831192		RPKM<10
LBU_1501	318	putative sucrose-6-phosphate hydrolase	K01193	7.37716	8.21887	2.50716	11.8304	0.155874	0.811613		-1.71289	0.000831423	DOWN	2.23838	6.43154e-07	UP
LBU_1502	1080	6-phosphofructokinase	K00850	224.457	301.553	353.607	375.685	0.425973	9.68281e-15		0.229733	1.69874e-12		0.0873797	0.00368516
LBU_1503	1722	phosphoglucomutase/phosphomannomutase family protein	K01835	167.113	129.736	120.126	147.523	-0.36524	3.2085e-10		-0.111035	0.00839732		0.296391	2.54425e-14
LBU_1504	786	amylopullulanase	K01200	63.6726	36.1434	92.3055	36.496	-0.816941	6.31586e-08		1.35268	1.19982e-50	UP	-1.33868	1.13485e-53	DOWN
LBU_1505	2106	ornithine decarboxylase	K01581	46.4138	33.9394	61.8108	27.7333	-0.451594	9.07189e-06		0.864898	3.32816e-44		-1.15624	7.2739e-76	DOWN
LBU_1506	1452	amino acid permease		363.524	310.304	141.315	243.421	-0.228364	5.34151e-08		-1.13477	1.4361e-232	DOWN	0.784536	3.21616e-107
LBU_1507	702	transposase		268.457	183.402	470.808	88.425	-0.549683	1.05135e-13		1.36013	1.06518e-226	UP	-2.41261	0	DOWN
LBU_1508	1170	major facilitator superfamily permease		48.1218	66.3355	98.2502	40.997	0.463091	5.29072e-05		0.566678	1.81057e-19		-1.26094	8.14657e-77	DOWN
LBU_1509	1029	transposase	K07482	16.7187	22.7491	38.7403	13.5274	0.444343	0.0356111		0.76803	3.87863e-12		-1.51795	3.81886e-36	DOWN
LBU_1510	996	alpha-amylase family protein	K16147	18.8429	34.4555	8.73249	11.3316	0.870717	2.35487e-06		-1.98027	1.33391e-41	DOWN	0.375883	0.0489389
LBU_1511	1236	putative oxalate:formate antiporter	K08177	1369.73	387.885	2356.35	20648.4	-1.82019	0	DOWN	2.60286	0	UP	3.13141	0	UP
LBU_1512	297	transcriptional regulator		803.043	231.478	273.812	7137.5	-1.7946	1.15821e-109	DOWN	0.242308	0.000667049		4.70416	0	UP
LBU_1513	309	putative membrane protein		17.7147	20.2263	11.0244	205.149	0.191279	0.646252		-0.875528	0.0022865		4.2179	3.62794e-168	UP
LBU_1514	3141	putative helicase	K17677	50.2897	52.6027	48.3198	293.534	0.0648745	0.400767		-0.122523	0.0126567		2.60284	0	UP
LBU_1515	990	UDP-glucose 4-epimerase	K01784	467.608	381.423	548.649	1112.19	-0.293908	8.02316e-11		0.524492	3.55641e-75		1.01945	0	UP
LBU_1516	843	putative dipeptidyl-peptidase		40.8151	104.738	16.1639	25.9954	1.35961	4.02563e-28	UP	-2.69594	2.45657e-150	DOWN	0.68548	1.48532e-06
LBU_1517	1371	amino acid permease	K11737	60.4594	37.9612	102.719	89.2499	-0.671442	4.20955e-09		1.43611	8.36407e-106	UP	-0.202782	9.15419e-05
LBU_1518	363	hypothetical protein		81.8601	24.7304	22.9619	47.6737	-1.72687	3.87297e-14	DOWN	-0.107048	0.621386		1.05395	6.04032e-10	UP
LBU_1519	369	seryl-tRNA synthetase		5208.96	2810.69	743.26	1218.09	-0.89007	1.66969e-295		-1.91899	0	DOWN	0.712679	3.01311e-115
LBU_1520	915	mannose-specific PTS system IID component	K02796	3008.27	4204.24	1095.83	2121.05	0.482911	2.85205e-201		-1.93982	0	DOWN	0.952758	0
LBU_1521	813	mannose-specific PTS system IIC component	K02795	2031.42	3607.1	1020.42	2292.3	0.828355	0		-1.82168	0	DOWN	1.16763	0	UP
LBU_1522	1002	mannose-specific PTS system IIAB component	K02794	2413.05	3256.28	1402.86	2992.86	0.432366	1.31766e-139		-1.21485	0	DOWN	1.09315	0	UP
LBU_1523	933	conserved hypothetical protein		51.9643	52.1283	50.728	25.1007	0.00454506	0.976624		-0.0392851	0.66931		-1.01505	2.1582e-23	DOWN
LBU_1524	411	conserved hypothetical protein		43.7604	82.9451	17.1059	26.5451	0.922531	7.71506e-07		-2.27766	5.09188e-49	DOWN	0.633951	0.00164547
LBU_1525	1380	Na+/H+ antiporter NhaC	K03315	22.6661	10.1283	44.3807	32.9864	-1.16214	9.72391e-09	DOWN	2.13154	4.54496e-80	UP	-0.428062	1.43926e-07
LBU_1526	867	putative anti-sigma factor		60.4298	279.172	42.8023	101.863	2.20782	1.66479e-145	UP	-2.70539	0	DOWN	1.25086	1.18035e-58	UP
LBU_1527	564	putative RNA polymerase ECF-type sigma factor		84.5758	572.002	59.6286	233.129	2.7577	4.02039e-249	UP	-3.26194	0	DOWN	1.96705	1.52679e-165	UP
LBU_1528	1308	seryl-tRNA synthetase	K01875	491.427	230.918	571.913	295.099	-1.08959	9.06925e-139	DOWN	1.30841	0	UP	-0.954597	0
LBU_1529	495	acetyltransferase		205.368	340.445	108.207	200.074	0.729209	1.21117e-19		-1.65363	6.98016e-155	DOWN	0.886742	4.6737e-38
LBU_1530	594	membrane protein		165.874	245.635	100.056	202.196	0.566424	1.94317e-11		-1.29571	7.01955e-94	DOWN	1.01495	4.88093e-57	UP
LBU_1531	804	putative esterase		584.539	1058.9	284.78	400.072	0.857188	1.78945e-123		-1.89464	0	DOWN	0.490411	3.62209e-43
LBU_1532	861	transcriptional regulator		722.037	814.977	192.269	225.572	0.174687	1.34551e-06		-2.08363	0	DOWN	0.230462	1.80337e-07
LBU_1533	498	putative deoxyribosyltransferase		241.817	135.54	249.458	274.413	-0.835193	7.11699e-18		0.880075	1.77431e-43		0.13755	0.00865318
LBU_1534	672	putative glutamine amidotransferase		268.805	248.238	536.479	620.015	-0.114838	0.113626		1.1118	1.87155e-180	UP	0.208783	3.0794e-12
LBU_1535	483	conserved hypothetical protein		105.235	122.34	104.143	186.546	0.217274	0.0920254		-0.232333	0.00544095		0.840973	6.84243e-32
LBU_1536	288	conserved hypothetical protein		57.0193	99.825	82.5463	83.2752	0.807951	5.27218e-05		-0.274199	0.0234347		0.0126842	0.919046
LBU_1537	1083	membrane protein		132.135	99.7846	67.3264	60.8776	-0.405124	1.16179e-06		-0.567644	1.92104e-18		-0.145261	0.0439772
LBU_1538	3183	putative membrane protein	K06994	185.238	234.445	223.45	116.509	0.339872	1.69309e-21		-0.0692975	0.00240658		-0.939518	1.50807e-290
LBU_1539	585	putative transcriptional regulator		175.11	344.012	287.069	189.873	0.9742	3.72081e-37		-0.261063	7.49342e-09		-0.596366	1.65575e-32
LBU_1540	246	putative membrane protein		50.8605	19.863	6.48192	0	-1.35646	4.6415e-05	DOWN	-1.61559	1.10771e-05	DOWN	-5.08355	7.13999e-06	DOWN
LBU_1541	915	putative beta-lactamase		188.017	177.221	120.403	99.1915	-0.0853157	0.25507		-0.557671	3.97429e-26		-0.279588	2.3415e-06
LBU_1542	918	putative CorA family magnesium transporter		68.9982	100.018	84.7964	76.635	0.535636	4.71638e-07		-0.23819	0.000374328		-0.146001	0.0363382
LBU_1543	888	prolyl aminopeptidase	K01259	94.225	94.5677	53.6251	67.4675	0.00523795	0.963921		-0.818438	1.35519e-26		0.331283	4.51066e-05
LBU_1544	504	protease synthase and sporulation negative regulatory protein pai 1		195.495	195.028	97.9338	83.4152	-0.00344922	0.974935		-0.993803	3.22451e-42		-0.231497	0.00897169
LBU_1545	588	putative carboxylesterase		171.557	188.039	107.117	111.167	0.132343	0.157015		-0.811841	4.49055e-34		0.0535395	0.483952
LBU_1546	423	conserved hypothetical protein		123.86	143.454	98.353	111.617	0.211881	0.0958001		-0.544546	2.84389e-10		0.182519	0.0430561
LBU_1547	831	aldo/keto reductase family oxidoreductase		92.219	124.574	38.8128	48.6671	0.433872	1.07563e-05		-1.6824	3.93406e-98	DOWN	0.326414	0.000990314
LBU_1548	450	putative membrane protein		71.247	40.656	12.5631	24.2445	-0.809361	1.86266e-05		-1.69427	8.59771e-19	DOWN	0.948462	7.25665e-06
LBU_1549	243	transcriptional regulator		347.546	200.615	25.0547	16.6429	-0.792779	6.30764e-12		-3.00127	3.42304e-93	DOWN	-0.59017	0.0283569
LBU_1550	288	transcriptional regulator		692.378	522.01	22.1466	35.9226	-0.407482	7.11808e-09		-4.55892	0	DOWN	0.697811	0.000840691
LBU_1551	186	oxidoreductase		811.409	1336.13	120.41	193.161	0.719555	1.05671e-27		-3.47203	0	DOWN	0.681849	7.57557e-10
LBU_1552	1623	ABC-type multidrug transport system ATP-binding and permease protein	K06148	152.252	197.583	150.765	97.529	0.375996	8.65295e-12		-0.39016	9.10454e-27		-0.628397	4.1678e-51
LBU_1553	303	conserved hypothetical protein		36.1311	56.6299	53.8215	32.2819	0.648324	0.0107928		-0.0733808	0.638153		-0.737459	9.7731e-06
LBU_1554	393	conserved hypothetical protein		103.468	127.514	262.992	120.856	0.30147	0.0324061		1.04437	5.99636e-48	UP	-1.12174	9.32571e-58	DOWN
LBU_1555	1068	hypothetical protein		14.6438	22.1311	52.7988	27.652	0.595786	0.00544457		1.25443	1.60902e-35	UP	-0.933123	3.53671e-24
LBU_1556	915	prolyl aminopeptidase		269.206	283.777	232.489	172.891	0.0760448	0.210433		-0.287591	5.49469e-13		-0.4273	7.06867e-23
LBU_1557	768	peptidoglycan-binding protein LysM		274.915	329.068	173.744	289.871	0.2594	2.27381e-05		-0.921424	1.22821e-93		0.738453	1.77289e-61
LBU_1558	558	translation elongation factor P	K02356	308.307	153.55	361.229	145.629	-1.00566	1.29341e-33	DOWN	1.23421	9.73016e-120	UP	-1.31062	1.11768e-141	DOWN
LBU_1559	915	pantothenate kinase	K00867	91.4446	105.687	94.8176	67.6352	0.208823	0.0365338		-0.156565	0.0154073		-0.487381	1.4513e-12
LBU_1560	570	Lysophospholipase L1 related esterase		301.817	533.087	154.496	400.134	0.820698	8.06004e-42		-1.7868	0	DOWN	1.37291	8.23618e-172	UP
LBU_1561	444	response regulator		89.822	97.7669	44.7284	110.151	0.122278	0.422302		-1.12815	1.22672e-23	DOWN	1.30022	3.94988e-35	UP
LBU_1562	750	hypothetical protein		75.07	56.5144	34.5003	42.5115	-0.409619	0.00227105		-0.712009	2.1102e-11		0.301244	0.00691262
LBU_1563	501	conserved hypothetical protein	K02030	290.316	178.051	420.411	100.623	-0.705336	3.11087e-16		1.23951	7.06193e-126	UP	-2.06285	5.66093e-281	DOWN
LBU_1564	294	conserved hypothetical protein		93.0928	241.571	391.982	87.0141	1.3757	2.8381e-23	UP	0.698341	1.23029e-27		-2.17147	9.88143e-165	DOWN
LBU_1565	285	conserved hypothetical protein		107.008	28.309	198.365	38.9408	-1.91838	1.63579e-16	DOWN	2.80883	4.85194e-101	UP	-2.3488	1.23801e-89	DOWN
LBU_1566	2280	UvrD/Rep family helicase	K03657	144.049	150.616	299.201	68.8477	0.0643168	0.222589		0.99024	1.33938e-281		-2.11963	0	DOWN
LBU_1567	615	putative Zn-dependent protease		377.639	749.99	319.146	731.312	0.989864	1.29124e-85		-1.23265	2.8932e-271	DOWN	1.19627	1.46742e-272	UP
LBU_1568	654	phosphoglycerate mutase family protein	K15634	204.463	352.372	151.165	247.21	0.785264	8.53462e-30		-1.22097	2.19543e-134	DOWN	0.709609	3.85375e-42
LBU_1569	693	putative glycerophosphoryl diester phosphodiesterase	K01126	288.87	438.634	137.847	219.455	0.602598	6.83944e-25		-1.66995	7.20884e-282	DOWN	0.670852	3.9613e-36
LBU_1570	240	hypothetical protein		355.149	182.289	177.273	262.17	-0.962195	3.37473e-16		-0.0402552	0.677931		0.564528	5.64704e-12
LBU_1571	1980	glycerophosphoryl diester phosphodiesterase		314.372	327.188	472.509	797.874	0.0576491	0.12906		0.530221	7.68868e-131		0.755821	0
LBU_1572	171	ATP-dependent endonuclease of the old family		978.618	376.789	75.8705	81.4017	-1.37699	4.44708e-53	DOWN	-2.31215	7.86133e-93	DOWN	0.10152	0.543265
LBU_1573	684	putative OLD family ATP-dependent endonuclease		948.893	1202.3	196.034	274.181	0.341483	9.4773e-24		-2.61662	0	DOWN	0.484023	3.23002e-25
LBU_1574	309	ATP-dependent endonuclease of the OLD family		169.555	385.035	91.7137	132.403	1.18323	2.15758e-30	UP	-2.06978	2.28463e-148	DOWN	0.52973	1.72561e-07
LBU_1575	165	ATP-dependent endonuclease of the old family protein		213.267	390.491	70.2833	117.422	0.872626	7.43659e-11		-2.47403	2.41502e-100	DOWN	0.740455	1.28206e-06
LBU_1576	708	glycopeptide antibiotics resistance protein		188.868	195.169	56.3048	123.543	0.0473494	0.582123		-1.7934	1.9065e-142	DOWN	1.13368	6.16566e-50	UP
LBU_1577	429	cell wall teichoic acid glycosylation protein GtcA		100.254	50.8575	136.681	68.6207	-0.979123	4.89714e-09		1.42628	1.47274e-44	UP	-0.994094	1.03983e-27
LBU_1578	450	acetobutylicum phosphotransbutyrylase		210.266	182.321	149.63	196.673	-0.205734	0.0416653		-0.285078	6.35775e-05		0.394399	4.39903e-09
LBU_1579	201	peptidase		206.194	150.948	135.584	199.802	-0.44995	0.00434624		-0.154864	0.183063		0.559386	5.20819e-08
LBU_1580	636	putative periplasmic protease		45.4925	70.7538	23.932	27.6537	0.637178	3.95664e-05		-1.56387	2.1581e-39	DOWN	0.208532	0.163096
LBU_1581	789	hypothetical protein		84.2437	102.689	46.1151	26.1057	0.285642	0.00932065		-1.15497	2.31283e-44	DOWN	-0.820874	3.12134e-13
LBU_1582	1224	transposase		217.855	62.8519	34.9963	14.0617	-1.79334	2.51097e-122	DOWN	-0.844755	9.06383e-26		-1.31543	1.71948e-31	DOWN
LBU_1583	510	transposase		288.259	54.5893	27.2865	9.58962	-2.40068	3.43866e-98	DOWN	-1.00043	3.85808e-13	DOWN	-1.50864	1.91918e-13	DOWN
LBU_1584	1056	putative membrane protein		205.122	160.552	330.208	197.723	-0.353436	1.33144e-07		1.04033	6.95187e-157	UP	-0.739894	1.01694e-95
LBU_1585	957	transposase	K07482	147.081	200.316	236.449	180.831	0.445666	6.63014e-10		0.239253	1.73388e-08		-0.386882	2.11268e-20
LBU_1586	687	capsular polysaccharide biosynthesis protein		289.116	603.571	462.941	199.33	1.06188	2.24454e-86	UP	-0.382695	5.21428e-33		-1.21567	3.97323e-198	DOWN
LBU_1587	1263	beta-carotene 15,15'-monooxygenase		97.2057	166.718	171.128	87.6478	0.778301	6.03011e-27		0.0376601	0.380779		-0.965283	2.00291e-93
LBU_1588	465	glycerol-3-phosphate cytidylyltransferase	K00980	829.066	407.619	785.742	474.912	-1.02427	7.27653e-76	DOWN	0.946833	7.87097e-141		-0.726395	4.223e-97
LBU_1589	912	LPS biosynthesis protein	K07271	350.69	217.426	544.71	346.198	-0.689671	7.82717e-33		1.32496	0	UP	-0.653891	1.62225e-109
LBU_1590	1434	putative polysaccharide repeat unit transport protein	K03328	317.372	211.817	499.877	281.762	-0.583357	1.31427e-34		1.23875	0	UP	-0.827094	2.86195e-236
LBU_1591	1050	putative galactofuranose transferase		332.9	185.387	422.039	220.261	-0.844547	2.997e-50		1.18683	1.23844e-245	UP	-0.938162	3.6712e-181
LBU_1591A	1119	putative glycosyltransferase		539.489	475.052	741.831	384.529	-0.183507	2.58687e-06		0.643005	9.96161e-164		-0.947999	0
LBU_1592	906	putative glycosyltransferase		556.707	352.067	851.676	482.51	-0.661068	1.99625e-47		1.27445	0	UP	-0.819747	2.17244e-250
LBU_1593	1116	UDP-galactopyranose mutase	K01854	400.099	228.39	626.403	451.129	-0.808859	2.33054e-59		1.45559	0	UP	-0.473551	2.12506e-86
LBU_1594	777	putative galactosyl transferase		346.205	275.239	596.535	417.484	-0.330939	3.21988e-08		1.11592	6.92517e-233	UP	-0.514883	4.17108e-67
LBU_1595	669	putative glycosyltransferase	K00996	217.411	154.061	281.035	138.337	-0.496926	2.88488e-09		0.867247	2.02877e-63		-1.02257	1.77171e-89	DOWN
LBU_1596	510	putative glycosyltransferase		128.797	196.076	337.244	230.52	0.606317	3.76848e-09		0.782379	5.28228e-49		-0.548901	7.50549e-29
LBU_1597	405	putative glycosyltransferase		121.641	166.664	200.438	188.104	0.454314	0.000218754		0.266207	0.000197812		-0.0916222	0.179442
LBU_1598	1164	LytR family transcriptional regulator of eps operon		521.32	553.042	781.024	743.77	0.0852218	0.0240569		0.497977	1.25876e-113		-0.0705101	0.000414412
LBU_1599	183	DNA-entry nuclease		0	14.9029	11.4858	1.54184	2.80224	0.0024002		-0.375739	0.354019		-2.89714	1.80384e-05	DOWN
LBU_1600	429	conserved hypothetical protein	K15051	3.64559	6.35719	14.8676	2.85006	0.802237	0.232906		1.22571	4.63595e-05	UP	-2.38311	1.43371e-11	DOWN
LBU_1601	804	hypothetical protein		32.0962	24.5926	12.9814	34.0412	-0.384176	0.0547336		-0.921776	1.17664e-08		1.39083	2.30624e-22	UP
LBU_1602	360	DNA-binding protein		245.455	56.5018	59.997	221.545	-2.11909	2.26806e-51	DOWN	0.0865955	0.530605		1.88463	1.64638e-95	UP
LBU_1603	1014	glycerol-3-phosphate dehydrogenase	K00057	1779.12	1775.57	703.138	753.158	-0.00287892	0.905234		-1.3364	0	DOWN	0.0991441	5.44443e-06
LBU_1604	267	bacterial luciferase family protein		117.15	128.956	18.4592	13.3857	0.13852	0.419407		-2.80447	4.32771e-62	DOWN	-0.463653	0.1157
LBU_1605	318	bacterial luciferase family protein		322.136	324.467	26.667	27.21	0.0103999	0.918552		-3.60494	2.61974e-228	DOWN	0.02908	0.889564
LBU_1606	1179	hypothetical protein		1486.36	1663.85	1535.35	2075.21	0.162743	2.88675e-14		-0.115956	1.58042e-16		0.434686	1.80723e-255
LBU_1607	495	conserved hypothetical protein		71.089	117.537	87.122	58.7112	0.725421	1.4423e-07		-0.432011	6.17655e-07		-0.5694	9.71303e-09
LBU_1608	186	hypothetical protein		277.477	41.5439	105.992	99.6142	-2.73966	9.84104e-41	DOWN	1.35124	7.83357e-15	UP	-0.0895283	0.522763
LBU_1609	990	ABC-type transport system substrate-binding protein	K01989	93.2056	123.965	102.277	445.369	0.411447	5.01134e-06		-0.277457	1.8033e-06		2.12252	0	UP
LBU_1611	594	ABC-type transport system ATP-binding protein		75.0384	99.8609	88.0982	790.892	0.41229	0.00160964		-0.180808	0.0291389		3.1663	0	UP
LBU_1612	426	putative peptide methionine sulfoxide reductase	K07305	921.488	449.738	811.057	1118.25	-1.03488	1.59672e-78	DOWN	0.85072	1.6654e-111		0.463363	4.20819e-57
LBU_1613	324	plasmid maintenance system antidote protein		41.0298	106.27	12.3036	13.3531	1.37299	6.31063e-12	UP	-3.11057	1.62015e-68	DOWN	0.118085	0.698967
LBU_1614	999	dTDP-glucose 4,6-dehydratase	K01710	287.274	258.664	318.794	242.991	-0.151345	0.00793529		0.301545	5.99476e-17		-0.391722	9.66527e-29
LBU_1615	360	putative transcription regulator		1307.64	959.267	374.277	539.231	-0.446964	1.59334e-22		-1.35783	3.48596e-236	DOWN	0.526799	3.73505e-30
LBU_1616	1014	glycerol uptake facilitator protein	K02440	348.575	516.4	231.878	417.391	0.56702	1.05249e-37		-1.15512	8.94734e-278	DOWN	0.848034	3.4844e-146
LBU_1617	210	conserved hypothetical protein	K07484	48.4083	34.0904	45.5586	8.95733	-0.505885	0.122773		0.418357	0.0521539		-2.34658	2.1981e-16	DOWN
LBU_1618	1452	polysaccharide biosynthesis protein		55.471	56.8174	59.9005	18.2015	0.0345996	0.759435		0.0762357	0.26192		-1.71851	8.40927e-92	DOWN
LBU_1619	786	conserved hypothetical protein		107.448	151.658	160.359	72.633	0.497186	7.87957e-08		0.080486	0.152769		-1.14261	3.74795e-72	DOWN
LBU_1620	987	beta(1,4)galactosyltransferase EpsM	K00745	125.18	106.151	146.134	46.3113	-0.237883	0.00697132		0.461173	5.56627e-17		-1.65786	8.56572e-144	DOWN
LBU_1621	1062	exopolysaccharides polymerase		61.8515	46.3313	91.6574	15.6753	-0.41682	0.000784381		0.984263	3.4562e-41		-2.54776	4.39504e-168	DOWN
LBU_1622	984	beta(1,4)galactosyltransferase EpsJ	K00745	150.992	142.274	243.735	46.3569	-0.0857947	0.28861		0.776636	7.43278e-67		-2.39446	0	DOWN
LBU_1623	1221	putative glycosyl transferase		158.189	141.741	255.905	49.2983	-0.158393	0.0233589		0.852349	2.52363e-101		-2.376	0	DOWN
LBU_1624	1128	putative alpha(1,3)rhamnosyltransferase EpsG		192.722	158.867	352.182	77.4595	-0.2787	2.59381e-05		1.1485	3.20416e-209	UP	-2.18481	0	DOWN
LBU_1625	1014	alpha(1,3)galactosyltransferase EpsF		151.923	158.349	235.809	78.2839	0.0597683	0.446404		0.57451	8.5865e-40		-1.59083	9.40595e-224	DOWN
LBU_1626	660	phospho-glucosyltransferase EpsE		421.795	369.313	565.451	177.131	-0.191697	0.000946613		0.614557	7.29594e-69		-1.67458	0	DOWN
LBU_1627	777	exopolysaccharide biosynthesis protein	K01104	326.076	457.903	740.561	265.936	0.489832	2.75177e-20		0.693577	4.37362e-130		-1.47754	0	DOWN
LBU_1628	768	exopolysaccharide biosynthesis protein	K00903	309.534	362.507	718.945	323.059	0.227913	8.79075e-05		0.987873	2.46063e-227		-1.15408	0	DOWN
LBU_1629	855	exopolysaccharide biosynthesis protein		267.977	179.423	384.693	145.753	-0.578739	7.50744e-18		1.10034	4.46732e-162	UP	-1.40018	1.59909e-254	DOWN
LBU_1630	1041	transcriptional regulator of eps operon		206.575	243.098	378.69	158.47	0.234872	0.000119595		0.639483	7.22384e-78		-1.25681	2.71417e-258	DOWN
LBU_1631	1281	GTP-binding protein	K03665	143.454	123.57	166.46	274.52	-0.215263	0.0027298		0.429845	1.30028e-21		0.721738	1.72449e-92
LBU_1632	465	conserved hypothetical protein		203.483	117.056	54.5546	94.6588	-0.797707	2.47005e-13		-1.10143	3.3618e-28	DOWN	0.795036	5.98021e-15
LBU_1633	300	cell wall-associated hydrolase		182.462	218.936	90.358	193.434	0.262917	0.0315071		-1.27679	3.26029e-42	DOWN	1.09811	5.01603e-32	UP
LBU_1634	708	hypothetical protein		15.4629	14.2846	21.9077	74.2586	-0.114347	0.713699		0.616976	0.00039023		1.76112	5.16753e-58	UP
LBU_1635	783	cell wall-associated hydrolase		417.455	161.962	925.851	382.454	-1.36596	3.90224e-101	DOWN	2.51512	0	UP	-1.27549	0	DOWN
LBU_1636	474	conserved hypothetical protein		747.335	587.353	1318.24	3858.31	-0.347527	2.68753e-11		1.16632	0	UP	1.54935	0	UP
LBU_1637	1047	D-lactate dehydrogenase		213.607	130.783	315.463	393.455	-0.70778	2.17867e-24		1.27029	4.87627e-204	UP	0.318729	1.99068e-25
LBU_1638	486	conserved hypothetical protein		3322.61	3259.64	8095.5	16976.2	-0.0276053	0.254186		1.31241	0	UP	1.06832	0	UP
LBU_1639	543	guanylate kinase Gmk		34.5626	47.5048	75.8166	39.145	0.45886	0.0226919		0.674441	3.15921e-10		-0.953685	1.16862e-18
LBU_1640	336	hypothetical protein		470.119	753.845	649.944	745.138	0.681244	9.53179e-26		-0.213953	8.58467e-08		0.197193	3.45033e-07
LBU_1641	1563	putative membrane protein		36.5224	60.0527	86.0667	109.276	0.717448	3.14343e-11		0.519226	1.90424e-19		0.34445	6.16701e-13
LBU_1642	627	hypothetical protein		39.9096	78.4751	59.8795	68.5515	0.975498	4.17221e-10		-0.390172	3.1392e-05		0.195125	0.0393796
LBU_1643	516	hypothetical protein		118.206	186.969	124.171	93.1406	0.661493	3.75146e-10		-0.590475	9.82527e-18		-0.41484	1.73769e-07
LBU_1644	492	putative membrane protein		195.495	160.983	67.0289	92.3315	-0.280225	0.00534188		-1.26405	8.10082e-50	DOWN	0.462039	1.19858e-06
LBU_1645	774	membrane protein		128.309	161.643	85.3087	88.4623	0.333188	0.000162683		-0.922049	3.15675e-47		0.0523701	0.483619
LBU_1646	1545	ABC-type transport system ATP-binding protein		105.276	117.533	127.602	132.647	0.158886	0.0276329		0.118582	0.00827482		0.0559423	0.190085
LBU_1647	378	hypothetical protein		103.436	194.502	147.452	160.486	0.91104	4.99554e-13		-0.399539	1.84279e-07		0.122198	0.12289
LBU_1648	1140	LytR family transcriptional regulator		228.42	406.593	138.729	239.338	0.831896	1.57002e-64		-1.55132	0	DOWN	0.786782	1.58693e-83
LBU_1649	1299	transposase	K07496	1474.86	2866.85	295.275	558.665	0.958884	0		-3.27934	0	DOWN	0.919923	3.46721e-286
LBU_1650	1803	oligoendopeptidase F	K08602	1216.99	2012.78	483.841	545.689	0.725871	0		-2.05658	0	DOWN	0.173547	2.5825e-19
LBU_1651	579	lactate oxidase	K10530	24.3102	40.2334	8.01157	119.555	0.726829	0.000951248		-2.32824	7.20102e-35	DOWN	3.89944	3.42499e-175	UP
LBU_1652	174	hypothetical protein		31.4589	40.4906	9.99719	104.322	0.364116	0.352866		-2.01799	6.90762e-10	DOWN	3.38338	1.48146e-42	UP
LBU_1653	285	hypothetical protein		2.74379	47.0488	11.9528	95.042	4.09992	1.21737e-15	UP	-1.97681	3.88499e-17	DOWN	2.99122	2.41567e-56	UP
LBU_1654	798	ABC-type Mn2+/Zn2+ transport system permease protein	K09816	207.744	184.835	214.26	417.93	-0.168571	0.0257091		0.213128	1.22368e-05		0.9639	5.50213e-143
LBU_1655	654	ABC-type zinc transport system ATP-binding protein	K09817	521.32	866.857	465.798	1248.56	0.733625	1.5252e-63		-0.896088	1.69689e-198		1.42249	0	UP
LBU_1656	801	HAD superfamily hydrolase	K07024	434.433	489.297	295.257	966.822	0.171575	0.000416404		-0.728736	4.71534e-97		1.71128	0	UP
LBU_1657	1971	fructose-specific PTS system IIABC component	K02769	2097.18	2841.62	236.304	219.216	0.438262	3.18833e-245		-3.588	0	DOWN	-0.108287	0.000112618
LBU_1658	915	fructose-1-phosphate kinase	K00882	1777.61	3912.14	327.941	341.979	1.13802	0	UP	-3.57645	0	DOWN	0.0604738	0.0787794
LBU_1659	750	phosphotransferase system repressor	K03436	634.967	693.627	125.535	120.512	0.127478	0.0024212		-2.46607	0	DOWN	-0.0589104	0.353808
LBU_1660	750	aspartate racemase	K01779	1352.3	900.897	578.194	482.424	-0.585985	4.44502e-76		-0.639808	2.06922e-132		-0.261252	9.50466e-19
LBU_1661	1551	putative UDP-N-acetylmuramoylalanyl-D-glutamate--2, 6-diaminopimelate ligase	K01928	475.439	590.447	425.438	460.74	0.312546	1.84071e-22		-0.472858	2.99621e-104		0.115002	3.48196e-07
LBU_1662	1209	two-component system sensor histidine kinase	K00936	413.304	537.627	274.631	383.054	0.379402	6.45761e-23		-0.96911	5.24442e-259		0.480051	3.51904e-59
LBU_1663	687	two-component system response regulator		621.486	711.582	426.86	655.763	0.195309	7.16739e-06		-0.737268	4.37732e-123		0.619412	1.80376e-90
LBU_1664	1845	ABC-type transport system ATP-binding and permease protein	K06147	8.90058	10.1625	24.042	3.36446	0.191279	0.41487		1.24231	7.30478e-28	UP	-2.83711	1.0978e-86	DOWN
LBU_1665	1728	ABC-type transport system ATP-binding protein	K06147	13.1235	27.6196	27.9768	9.85151	1.07354	2.72385e-11	UP	0.0185402	0.840824		-1.50581	5.11833e-43	DOWN
LBU_1666	771	membrane protein		194.734	115.993	221.763	126.623	-0.747468	2.31816e-18		0.934983	2.01928e-65		-0.808486	2.15034e-55
LBU_1667	1101	GTP-binding protein	K06942	272.734	326.455	323.426	179.049	0.25939	4.0997e-07		-0.0134466	0.689451		-0.853083	1.79578e-124
LBU_1668	264	hypothetical protein		275.47	281.074	427.191	228.005	0.0290548	0.808811		0.60393	2.88609e-21		-0.905816	1.19878e-44
LBU_1669	891	chromosome partitioning protein ParB	K03497	98.296	159.293	204.83	104.397	0.696477	1.49794e-15		0.362748	5.03664e-14		-0.972353	4.40603e-80
LBU_1670	780	chromosome partitioning protein, membrane-associated ATPase	K03496	131.332	90.3251	153.601	73.4329	-0.540024	8.00042e-08		0.765989	1.9902e-33		-1.06469	2.02281e-61	DOWN
LBU_1671	825	chromosome partitioning protein ParB	K03497	134.595	110.742	186.602	121.527	-0.281421	0.00260517		0.752759	2.78179e-41		-0.618694	7.39431e-32
LBU_1672	720	glucose-inhibited division protein B	K03501	150.965	131.943	201.634	141.601	-0.194308	0.0387039		0.61183	1.52551e-27		-0.509915	1.09663e-21
LBU_1673	525	membrane ancor connecting muts2 with cell-division z-ring		77.4532	122.942	43.0736	42.9952	0.666582	2.75146e-07		-1.5131	3.04791e-53	DOWN	-0.00262888	0.983473
LBU_1674	960	thiamin biosynthesis lipoprotein ApbE	K03734	93.6746	153.525	33.6728	52.6103	0.712747	1.02877e-16		-2.18882	1.17076e-196	DOWN	0.643761	3.87009e-12
LBU_1675	783	putative protein tyrosine/serine phosphatase		123.838	163.849	45.913	57.6564	0.403908	4.48719e-06		-1.83539	1.37073e-136	DOWN	0.328577	0.000457253
LBU_1676	549	putative oxidoreductase		789.101	1019.19	410.19	294.491	0.369147	5.45602e-19		-1.31307	0	DOWN	-0.47807	2.42379e-29
LBU_1677	540	putative oxidoreductase		845.696	1013.88	577.287	431.768	0.261669	2.49163e-10		-0.81252	1.46445e-162		-0.419031	1.00826e-31
LBU_1678	546	transcriptional regulator		406.744	459.95	386.691	322.464	0.177358	0.00368828		-0.250298	5.44334e-10		-0.262043	7.00437e-10
LBU_1679	1401	dipeptidase		1342.93	1766.08	129.905	260.137	0.395172	4.83758e-90		-3.76503	0	DOWN	1.00182	2.50988e-166	UP
LBU_1680	168	hypothetical protein		586.485	158.953	178.179	93.4922	-1.88349	3.63347e-49	DOWN	0.164724	0.160148		-0.930411	1.93415e-13
LBU_1681	663	ABC-type transport system ATP-binding protein	K01990	86.1003	169.338	127.468	73.9081	0.975817	2.19613e-21		-0.409772	3.83058e-11		-0.78633	6.69871e-27
LBU_1682	645	membrane protein		46.0701	61.1338	76.0755	44.9117	0.408139	0.0112062		0.315463	0.000678701		-0.760343	2.21155e-15
LBU_1683	699	membrane protein		92.8531	77.5448	122.044	45.2095	-0.25992	0.0345262		0.654296	9.60037e-19		-1.4327	1.70588e-69	DOWN
LBU_1684	852	putative membrane protein		143.179	110.834	136.452	135.559	-0.369423	3.952e-05		0.299996	5.51465e-07		-0.00948084	0.868506
LBU_1685	498	glucose/glucoside-specific PTS system IIA component	K02757	246.528	102.91	31.437	30.4064	-1.26036	1.84114e-34	DOWN	-1.71085	1.49076e-50	DOWN	-0.0480879	0.760577
LBU_1686	393	FMN-binding protein		252.701	179.56	102.726	223.762	-0.492961	1.20965e-06		-0.805673	5.02814e-22		1.12317	1.78636e-49	UP
LBU_1687	645	putative transcription regulator		12.1237	31.712	21.9125	5.54105	1.3872	1.04842e-07	UP	-0.53328	0.000354462		-1.98352	2.46282e-19	DOWN
LBU_1688	675	ABC-type transport system ATP-binding protein	K02003	32.4377	23.9054	10.3082	29.4	-0.440333	0.0441292		-1.21354	1.07968e-10	DOWN	1.51202	1.23987e-18	UP
LBU_1689	1059	ABC-type transport system permease protein	K02004	29.5365	28.0063	17.3842	36.7682	-0.0767477	0.67481		-0.687979	5.73709e-08		1.08069	1.87932e-21	UP
LBU_1690	504	TetR family transcriptional regulator		29.4794	47.1224	19.2704	36.3892	0.676706	0.00175708		-1.29003	1.83703e-16	DOWN	0.917124	1.4109e-08
LBU_1691	642	conserved hypothetical protein	K00104	31.6689	104.254	35.6753	37.5036	1.71896	5.46252e-30	UP	-1.5471	6.26071e-57	DOWN	0.072102	0.568921
LBU_1692	303	conserved hypothetical protein		25.8079	16.5014	18.8973	36.6275	-0.645222	0.0910126		0.195592	0.472739		0.954745	5.38358e-06
LBU_1693	204	FAD binding domain protein		34.4991	14.4829	15.6329	8.75975	-1.25221	0.00442469		0.110235	0.761876		-0.835621	0.0313256
LBU_1694	726	hypothetical protein	K09861	62.4722	139.148	56.8057	96.7725	1.15533	4.30935e-25	UP	-1.29251	2.9345e-65	DOWN	0.768562	8.67498e-22
LBU_1695	636	hypothetical protein		265.578	545.483	361.373	391.735	1.0384	6.31266e-70	UP	-0.594047	1.89805e-60		0.116393	0.00254414
LBU_1696	1191	ykud domain protein		320.408	590.119	375.604	456.914	0.881095	5.423e-107		-0.651793	3.18027e-142		0.282711	1.09927e-26
LBU_1697	327	putative NAD(P)H nitroreductase	K00540	4.78275	28.4956	1.3299	2.58859	2.57483	5.78877e-08	UP	-4.42135	8.18893e-25	DOWN	0.960845	0.216695
LBU_1698	1143	DNA-cytosine methyltransferase family protein	K00558	483.692	770.987	198.415	211.144	0.672619	2.33208e-84		-1.95818	0	DOWN	0.0897023	0.0220558
LBU_1699	1188	Type II restriction enzyme NgoFVII		154.684	229.948	100.422	231.251	0.571979	1.28632e-20		-1.19523	8.88807e-154	DOWN	1.20338	1.16266e-168	UP
LBU_1700	1851	stress-sensitive restriction system protein		194.333	280.373	109.601	186.63	0.528815	4.1293e-33		-1.35509	0	DOWN	0.76793	4.49505e-101
LBU_1701	786	putative restriction endonuclease	K07454	105.458	109.731	88.7092	400.259	0.05731	0.600073		-0.30682	1.08494e-05		2.17378	0	UP
LBU_1702	2532	aminopeptidase N	K01256	708.167	459.297	1029.17	1294.37	-0.624664	1.6302e-149		1.16398	0	UP	0.330764	6.869e-206
LBU_1703	777	hypothetical protein		5.03204	3.50996	20.7085	17.7936	-0.519691	0.336109		2.5607	3.13945e-27	UP	-0.218861	0.162275
LBU_1704	948	transcriptional regulator		47.8426	82.9486	102.756	45.5378	0.793922	3.21026e-11		0.308932	2.47812e-06		-1.17408	1.53431e-58	DOWN
LBU_1705	1335	dipeptidase		67.9473	116.699	76.0086	63.6876	0.780306	2.25073e-20		-0.618559	5.37938e-30		-0.255149	3.39966e-05
LBU_1706	156	hypothetical protein		65.165	32.7793	17.6553	18.0869	-0.991312	0.00460219		-0.892683	0.00507311		0.0348458	0.923717
LBU_1707	1419	sodium:sulfate symporter family protein	K03319	529.586	451.496	233.375	401.129	-0.23015	5.42719e-11		-0.952062	6.39709e-248		0.781416	1.43097e-170
LBU_1708	1404	fumarate hydratase	K01679	618.789	684.48	439.627	903.877	0.145562	2.17072e-06		-0.638727	4.45696e-187		1.03985	0	UP
LBU_1709	312	hypothetical protein		20.0508	32.0508	20.2107	10.8522	0.676706	0.0448125		-0.665245	0.00236165		-0.897136	0.00120731
LBU_1710	186	hypothetical protein		21.021	60.4831	31.174	100.626	1.5247	2.46313e-05	UP	-0.956186	9.64313e-06		1.69058	1.69547e-20	UP
LBU_1711	177	hypothetical protein		35.3437	105.289	30.7117	87.1442	1.57483	2.36517e-08	UP	-1.77749	2.45028e-20	DOWN	1.50462	1.06861e-14	UP
LBU_1712	915	hypothetical protein		42.7311	56.8795	57.35	64.8599	0.412622	0.00314744		0.0118848	0.892941		0.177533	0.02703
LBU_1713	204	hypothetical protein		402.489	148.171	25.5811	59.9351	-1.44169	1.48753e-28	DOWN	-2.53411	3.20829e-49	DOWN	1.22833	4.12508e-09	UP
LBU_1714	501	macro domain protein		162.327	260.158	18.9518	107.193	0.680484	7.25568e-14		-3.77898	7.69337e-298	DOWN	2.49981	1.71088e-91	UP
LBU_1715	783	putative protein tyrosine/serine phosphatase		363.526	715.333	58.5947	121.679	0.976559	2.16906e-101		-3.60977	0	DOWN	1.05424	2.12042e-48	UP
LBU_1716	1581	ABC-type multidrug transport system ATP-binding and permease protein	K06148	144.921	104.004	291.34	99.1086	-0.478633	5.07701e-13		1.48607	0	UP	-1.55562	0	DOWN
LBU_1717	2196	Kae1-associated kinase		158.461	97.8522	208.098	82.5739	-0.695453	4.1638e-36		1.08859	1.13162e-220	UP	-1.33351	0	DOWN
LBU_1718	759	putative protein tyrosine/serine phosphatase		164.844	210.801	57.9646	75.5886	0.354778	5.69048e-06		-1.86264	2.53437e-173	DOWN	0.382995	4.60656e-06
LBU_1719	786	putative glycerol kinase	K00864	97.4987	154.694	55.4202	47.385	0.66596	1.39906e-12		-1.48093	8.28207e-96	DOWN	-0.225982	0.0165796
LBU_1720	669	cobyric acid synthase	K07009	239.62	431.778	311.153	468.854	0.849543	3.67414e-42		-0.472666	5.96497e-34		0.591514	1.4693e-58
LBU_1721	246	hypothetical protein		2790.97	4344.45	659.093	1364.9	0.638409	4.02924e-93		-2.72062	0	DOWN	1.05024	1.31518e-165	UP
LBU_1722	2091	ATP-dependent Clp-like proteinase ATP-binding subunit	K04086	2719.54	4824.24	681.156	1351.81	0.826939	0		-2.82424	0	DOWN	0.988837	0
LBU_1723	678	putative diguanylate cyclase	K02488	35.7542	72.2369	17.5319	34.4025	1.01462	1.19283e-10	UP	-2.04275	4.82414e-61	DOWN	0.972527	1.68937e-11
LBU_1724	912	conserved hypothetical protein		125.185	155.874	120.64	58.2669	0.316316	0.000128891		-0.369667	1.39019e-11		-1.04997	2.71489e-55	DOWN
LBU_1725	3189	carbamoyl-phosphate synthase large subunit	K01955	59.3412	89.4041	23.478	19.6421	0.591308	1.08045e-22		-1.92903	0	DOWN	-0.257363	0.000343496
LBU_1726	1086	carbamoyl-phosphate synthetase small subunit	K01956	46.0835	76.489	28.0308	12.471	0.731002	2.20644e-10		-1.44824	7.19945e-64	DOWN	-1.16844	3.49335e-19	DOWN
LBU_1727	1278	dihydroorotase	K01465	17.1326	59.396	13.0441	11.8485	1.79362	8.24258e-36	UP	-2.18697	5.22864e-102	DOWN	-0.13869	0.365337
LBU_1728	957	aspartate carbamoyltransferase	K00609	41.6729	96.0612	11.3604	14.152	1.20484	1.90895e-24	UP	-3.07993	1.65524e-178	DOWN	0.316989	0.0666552
LBU_1729	543	pyrimidine operon regulatory protein/uracil phosphoribosyltransferase	K02825	312.504	358.693	92.5016	273.842	0.198875	0.0043146		-1.9552	1.30367e-224	DOWN	1.56579	1.32508e-136	UP
LBU_1730	924	dihydroorotate dehydrogenase	K00226	147.256	179.553	227.087	97.9199	0.286084	0.000170668		0.338838	3.60212e-14		-1.21357	6.68753e-131	DOWN
LBU_1731	795	conserved hypothetical protein		58.0337	172.382	29.083	48.3865	1.57065	6.85302e-53	UP	-2.56736	1.98618e-220	DOWN	0.734427	1.0274e-11
LBU_1732	198	cold-shock protein CspA	K03704	860.967	338.609	376.675	132.528	-1.34634	2.872e-52	DOWN	0.153699	0.0367662		-1.50702	1.33512e-65	DOWN
LBU_1733	303	putative resolvase-like protein		38.7119	40.1285	29.1832	38.8003	0.0518508	0.862261		-0.459487	0.0167358		0.41093	0.0286557
LBU_1734	912	conserved hypothetical protein		21.4358	27.6611	43.3924	34.4445	0.367834	0.0685141		0.649584	2.46637e-09		-0.33317	0.000894
LBU_1735	750	glutamine amidotransferase	K07010	541.13	746.657	415.26	583.122	0.46447	2.20157e-28		-0.84643	3.6149e-178		0.489784	5.19834e-58
LBU_1736	807	HAD superfamily hydrolase	K07024	311.048	443.134	333.388	506.506	0.510606	6.96175e-22		-0.410538	1.79655e-32		0.603374	1.56645e-78
LBU_1737	879	alpha/beta hydrolase		72.9492	115.962	110.245	58.6354	0.668687	7.93908e-11		-0.0729377	0.244773		-0.910869	6.27704e-39
LBU_1738	1311	cellobiose-specific PTS system IIC component		30.4203	19.1558	45.1132	22.957	-0.667248	5.58693e-05		1.23577	2.39348e-36	UP	-0.974615	4.40994e-27
LBU_1739	195	cation transport protein		256.65	65.2672	7.8055	3.85854	-1.97537	3.15787e-27	DOWN	-3.06379	5.64529e-26	DOWN	-1.01643	0.0808675
LBU_1740	837	LysR family transcriptional regulator		366.232	665.789	45.2024	15.9563	0.862308	4.08495e-82		-3.88059	0	DOWN	-1.50228	7.01109e-34	DOWN
LBU_1741	465	riboflavin synthase beta subunit	K00794	10.0901	45.4539	8.10525	0.404525	2.17147	1.1276e-13	UP	-2.48748	3.33394e-34	DOWN	-4.32456	1.69319e-11	DOWN
LBU_1742	1053	GTP cyclohydrolase II	K14652	11.1393	28.2738	14.1105	4.37659	1.34381	3.36816e-10	UP	-1.0027	5.27824e-14	DOWN	-1.68889	1.53606e-16	DOWN
LBU_1743	213	riboflavin synthase alpha subunit		18.3563	2.13399	14.632	6.18182	-3.10465	0.0001211	DOWN	2.77751	7.79656e-07	UP	-1.24303	0.00303138
LBU_1744	324	riboflavin-specific deaminase	K11752	0	6.66377	15.2118	0.870852	2.4652	0.012112		1.19078	0.000477392	UP	-4.12662	2.78345e-14	DOWN
LBU_1745	627	TetR family transcriptional regulator		69.8419	120.703	64.8502	1036.67	0.789298	9.37127e-11		-0.896279	6.79186e-28		3.9987	0	UP
LBU_1746	1998	ABC-type transport system ATP-binding and permease protein		154.204	141.844	111.585	1790.66	-0.120532	0.0284742		-0.346163	2.39712e-19		4.00427	0	UP
LBU_1747	390	hypothetical protein		33653.2	15254.5	4908.73	15516.4	-1.14151	0	DOWN	-1.63581	0	DOWN	1.66037	0	UP
LBU_1748	258	hypothetical protein		248.536	51.9725	32.0259	18.9562	-2.25763	1.2786e-40	DOWN	-0.69851	0.000231463		-0.756568	0.00136726
LBU_1749	1287	extramembranal transfer protein	K03740	1221.27	1337.57	1341.46	1169.47	0.13123	8.96435e-09		0.00419359	0.784584		-0.197948	6.97989e-42
LBU_1750	243	D-alanyl carrier protein	K14188	1724.86	1183.58	1903.86	1383.69	-0.543323	2.7465e-28		0.68577	7.18678e-103		-0.460409	7.18848e-55
LBU_1751	1233	D-alanyl transfer protein DltB	K03739	309.494	278.143	428.647	362.02	-0.154086	0.00176725		0.623964	1.82918e-99		-0.24372	6.51304e-20
LBU_1752	1503	D-alanine-activating enzyme	K03367	563.983	617.998	869.032	1001.72	0.131952	2.39552e-05		0.491808	6.08152e-159		0.204997	3.62325e-39
LBU_1753	159	hypothetical protein		408.203	333.758	529.694	515.807	-0.290486	0.0183797		0.666358	4.38595e-19		-0.0383273	0.56923
LBU_1754	321	hypothetical protein		17.0525	75.0485	140.895	93.173	2.13784	3.94117e-15	UP	0.908725	1.21551e-17		-0.596637	8.73077e-10
LBU_1755	1209	hypothetical protein		26.5187	11.4669	74.2781	80.2826	-1.20954	1.99763e-09	DOWN	2.69547	7.5746e-153	UP	0.11215	0.0720395
LBU_1756	498	conserved hypothetical protein		45.537	69.8238	35.9487	26.818	0.616681	0.000471902		-0.957778	4.83155e-15		-0.422737	0.00540091
LBU_1757	1815	cadmium efflux ATPase	K01552	322.27	496.237	167.642	632.869	0.622757	2.39564e-75		-1.56565	0	DOWN	1.91653	0	UP
LBU_1758	1272	Na+-H+ antiporter		82.9931	121.318	61.4823	41.1847	0.547727	2.1624e-11		-0.980546	5.80449e-64		-0.578063	4.03228e-15
LBU_1759	657	putative metal-dependent membrane protease		63.0821	86.999	52.6222	76.8736	0.463769	0.000538559		-0.725326	2.43691e-15		0.546816	2.13128e-09
LBU_1760	735	membrane protein		5.31959	14.8421	21.9904	11.0047	1.48031	4.8658e-05	UP	0.56718	0.000788914		-0.998752	1.08145e-08
LBU_1761	273	membrane protein		0	0	2.65493	0.344513	0	0		3.67317	0.00738166		-2.94605	0.0118584		RPKM<10	pseudogene
LBU_1762	1095	basic membrane protein family	K07335	197.102	56.4542	299.516	267.125	-1.80379	4.67263e-100	DOWN	2.40748	0	UP	-0.16512	9.09801e-07
LBU_1763	345	hypothetical protein		18.1329	7.24628	26.2607	40.0743	-1.32329	0.00510424		1.8576	3.50461e-11	UP	0.609771	0.000610908
LBU_1764	564	conserved hypothetical protein		52.6866	45.736	57.444	45.1917	-0.204105	0.267655		0.328825	0.00416059		-0.346099	0.00185899
LBU_1765	1041	protein kinase domain protein		48.8268	45.5194	52.6365	36.8619	-0.10119	0.472885		0.209582	0.0155576		-0.513934	3.77478e-09
LBU_1766	597	conserved hypothetical protein		90.3795	84.5123	68.2304	48.8377	-0.0968342	0.478951		-0.308747	0.000734945		-0.482419	1.72255e-06
LBU_1767	1098	ABC-type sugar transport system substrate-binding protein	K07335	185.168	86.0023	243.909	210.632	-1.10639	6.35867e-46	DOWN	1.5039	9.31088e-214	UP	-0.21162	1.58562e-08
LBU_1768	1086	ABC-type sugar transport system substrate-binding protein	K07335	1766.29	1037.15	3232.02	9340.07	-0.768097	2.05493e-229		1.63981	0	UP	1.531	0	UP
LBU_1769	1545	ABC-type sugar transport system ATP-binding protein	K02056	147.792	101.573	345.275	227.734	-0.541053	6.66113e-16		1.76524	0	UP	-0.600399	3.98748e-101
LBU_1770	1140	ABC-type sugar transport system permease protein	K02057	104.95	68.3803	302.952	163.601	-0.618049	5.06978e-11		2.14744	0	UP	-0.888909	2.14835e-129
LBU_1771	957	ABC-type sugar transport system permease protein	K02057	191.205	55.6894	397.919	182.011	-1.77965	1.62606e-83	DOWN	2.837	0	UP	-1.12845	1.35529e-210	DOWN
LBU_1772	198	MFS transporter		51.3421	29.2696	56.3731	43.7009	-0.81074	0.0172988		0.945604	1.26331e-05		-0.367342	0.0554617
LBU_1773	372	hypothetical protein		42.0419	12.2188	24.1599	9.35463	-1.78273	2.34232e-08	DOWN	0.983511	5.21267e-05		-1.36886	4.31353e-08	DOWN
LBU_1774	843	aldo/keto reductase family oxidoreductase		139.142	161.758	44.8806	74.9738	0.217274	0.00941991		-1.84967	1.35427e-146	DOWN	0.740294	1.36211e-18
LBU_1775	705	putative N-acetylglucosamine-6-phosphate isomeras	K02564	206.309	1533.02	99.5182	13.0739	2.8935	0	UP	-3.94528	0	DOWN	-2.92827	1.57875e-140	DOWN
LBU_1776	168	conserved hypothetical protein		4.65464	31.1143	1.72571	0	2.74084	2.83802e-05	UP	-4.17232	3.58084e-14	DOWN	0	0
LBU_1777	969	peptidoglycan binding domain protein		85.5416	149.754	107.56	125.111	0.807897	3.63575e-20		-0.477452	4.17927e-18		0.218071	9.91525e-05
LBU_1778	255	amino acid ABC transporter permease		254.527	377.446	209.48	165.974	0.568453	5.03124e-08		-0.849455	3.81081e-32		-0.335857	9.65724e-05
LBU_1779	663	deoxyadenosine kinase		607.42	840.006	1109.5	1782.45	0.467706	1.40665e-28		0.401432	1.55884e-62		0.683956	1.01668e-279
LBU_1780	699	deoxyadenosine kinase		606.342	432.268	499.373	743.266	-0.488207	9.10607e-24		0.208194	8.7752e-10		0.573761	6.03823e-91
LBU_1781	1461	ABC-type glutamine transport system substrate-binding and permease protein	K02029	303.479	227.27	637.434	436.978	-0.41719	6.59762e-19		1.48787	0	UP	-0.544715	1.76763e-147
LBU_1782	747	ABC-type glutamine transport system ATP-binding protein	K02028	467.931	198.367	861.314	568.089	-1.23813	5.28821e-93	DOWN	2.11837	0	UP	-0.600422	1.12656e-121
LBU_1783	1311	Xanthine/uracil/vitamin C permease	K06901	234.415	93.1788	665.364	646.096	-1.33099	1.60889e-91	DOWN	2.83607	0	UP	-0.042395	0.0382897
LBU_1784	1539	chloride channel protein		22.3568	29.2394	29.9997	22.7338	0.387199	0.00987227		0.0370357	0.69439		-0.400108	1.88461e-05
LBU_1785	468	prolyl-tRNA synthetase		18.3799	38.3639	12.3897	4.62221	1.06162	5.88941e-05	UP	-1.63061	1.449e-17	DOWN	-1.42248	6.25157e-06	DOWN
LBU_1786	591	Cell separation protein		14.5546	99.9833	39.4898	15.5958	2.78021	3.85955e-47	UP	-1.34021	5.52643e-41	DOWN	-1.34032	2.65654e-18	DOWN
LBU_1787	1386	6-phosphogluconate dehydrogenase, decarboxylating	K00033	1093.42	955.484	970.527	1466.76	-0.194541	1.90087e-15		0.0225365	0.186598		0.595797	0
LBU_1788	1833	pyruvate oxidase	K00158	470.553	174.637	1042.2	234.437	-1.43	1.15762e-283	DOWN	2.5772	0	UP	-2.15235	0	DOWN
LBU_1789	1896	glucose-inhibited division protein A	K03495	187.246	132.754	524.331	119.599	-0.496183	1.07617e-20		1.98172	0	UP	-2.13227	0	DOWN
LBU_1790	1386	putative GTPase	K03650	190.699	150.939	385.565	78.0374	-0.337331	2.3842e-08		1.353	0	UP	-2.30474	0	DOWN
LBU_1791	870	preprotein translocase subunit YidC	K03217	399.079	415.485	1009.72	677.391	0.0581232	0.258817		1.28108	0	UP	-0.57589	9.67797e-154
LBU_1792	366	ribonuclease P protein component	K03536	1064	1675.96	2828.49	2034.71	0.655482	1.52316e-56		0.755045	1.0578e-269		-0.475208	4.93929e-128
LBU_1793	141	50S ribosomal protein L34	K02914	1026	1072.68	1690.16	1210	0.0641878	0.426827		0.655942	7.72055e-50		-0.482153	1.98849e-31

## Sheet: Table S3
Table S3. Significantly up-/down-regulated genes in each phase of Lb.bulgaricus 2038
	lag vs control	logarithmic vs lag	stationary vs logarithmic
Up-regulated Genes	199	352	203
Down-regulated Genes	203	469	384

## Sheet: Table S4
Table S4. Consecutive down-regulated genes in each phase of Lb.bulgaricus 2038
			RPKM				lag vs control		logarithmic vs lag		stationary vs logarithmic
Gene	Annotation	Length	control	lag	logarithmic	stationary	log2(Fold_change) normalized	FDR	log2(Fold_change) normalized	FDR	log2(Fold_change) normalized	FDR
LBU_0424	hypothetical protein	162	386.163	125.559	49.662	13.9336	-1.62084	5.64021e-26	-1.33816	4.71137e-15	-1.83357	1.39386e-10
LBU_0892	conserved hypothetical protein	579	213.39	96.1676	39.3068	15.1068	-1.14987	3.64892e-30	-1.29077	1.29023e-36	-1.37958	1.26052e-18
LBU_1035	transposase	1224	129.691	38.621	17.2317	8.60607	-1.74762	7.53386e-71	-1.16432	7.38851e-27	-1.00164	5.4856e-11
LBU_1540	conserved hypothetical protein	246	50.8605	19.863	6.48192	0	-1.35646	4.6415e-05	-1.61559	1.10771e-05	-5.08355	7.13999e-06
LBU_1583	conserved hypothetical protein	510	288.259	54.5893	27.2865	9.58962	-2.40068	3.43866e-98	-1.00043	3.85808e-13	-1.50864	1.91918e-13

## Sheet: Table S5
Table S5. Lactic acid contration during Lb.bulgaricus 2038 culture in whey
	D-lactate (mM)	L-lactate (mM)
Control	-	-
inductive phase	-	-
log growth phase	1.48772	-
stationary phase	5.97268	-

## Sheet: Table S6
Table S6. Expression profile of amino acids synthesis genes
					RPKM
ORFs	EC.No	Enzyme	Substrate	Product	control	lag	logarithmic	stationary
Aspartate synthesis
LBU0363	2.6.1.1	aspartate aminotransferase	oxaloacetate	Aspartate	40.4789	22.1031	60.087	53.1855
LBU1079	2.6.1.1	aspartate aminotransferase	oxaloacetate	Aspartate	1746.75	2297.92	996.916	1015.84
LBU0251	3.5.1.1	L-asparaginase	Asparagine	Aspartate	41.2775	39.5445	25.0101	30.5232
LBU1660	5.1.1.13	aspartate racemase	L-aspartate	D-aspartate	1352.3	900.897	578.194	482.424
Asparagine synthesis
LBU1019	6.3.1.1	Aspartate--ammonia ligase	Aspartate	Asparagine	372.92	146.262	670.134	312.952
LBU0807	6.3.5.4	Asparagine synthetase B	Aspartate	Asparagine	2.45327	5.52577	6.53738	3.83585
LBU0163	6.3.5.4	Asparagine synthetase B	Aspartate	Asparagine	431.492	538.221	520.924	760.857
Threonine synthesis
LBU0936	2.7.2.4	aspartate kinase	aspartate	4-Phospho-L-aspartate	16.5047	8.43577	45.946	10.4046
LBU1158	2.7.2.4	aspartate kinase	aspartate	4-Phospho-L-aspartate	242.583	251.335	195.009	83.4615
LBU1157	1.2.1.11	Aspartate beta-semialdehyde dehydrogenese	4-Phospho-L-aspartate	L-Aspartate 4-semialdehyde	403.27	388.799	332.804	125.974
LBU1159	1.1.1.3	Homoserine dehydrogenase	L-Aspartate 4-semialdehyde	Homoserine	257.938	235.874	140.607	83.8201
LBU1495	2.7.1.39	Homoserine kinase	Homoserine	O-Phospho-L-homoserine	141.191	188.208	149.321	422.907
LBU1496	4.2.3.1	threonine synthase	O-Phospho-L-homoserine	Threonine	227.879	238.794	295.652	478.845
Lysine synthesis
LBU0936	2.7.2.4	aspartate kinase	aspartate	4-Phospho-L-aspartate	16.5047	8.43577	45.946	10.4046
LBU1158	2.7.2.4	aspartate kinase	aspartate	4-Phospho-L-aspartate	242.583	251.335	195.009	83.4615
LBU1157	1.2.1.11	Aspartate beta-semialdehyde dehydrogenese	4-Phospho-L-aspartate	L-Aspartate 4-semialdehyde	403.27	388.799	332.804	125.974
LBU0933	4.2.1.52	dihydrodipicolinate synthase	L-Aspartate 4-semialdehyde	L-2,3-Dihydrodipicolinate	173.213	98.4835	293.737	160.799
LBU0932	1.3.1.26	dihydrodipicolinate reductase	L-2,3-Dihydrodipicolinate	2,3,4,5-Tetrahydrodipicolinate	125.317	108.973	182.686	125.644
LBU0935	2.3.1.89	tetrahydrodipicolinate N-acetyltransferase	2,3,4,5-Tetrahydrodipicolinate	N-Acetyl-L-2-amino-6-oxopimelate	100.759	33.8995	177.849	56.1151
LBU0931	2.6.1.-	aminotransferase	N-Acetyl-L-2-amino-6-oxopimelate	N-Acetyl-LL-2,6-diaminoheptanedioate	117.098	54.9908	135.148	86.4133
LBU0934	3.5.1.47	N-acetyldiaminopimelate deacetylase	N-Acetyl-LL-2,6-diaminoheptanedioate	LL-2,6-Diaminoheptanedioate	48.7468	6.49342	123.121	23.0448
LBU0937	5.1.1.7	Diaminopimelate epimerase	LL-2,6-Diaminoheptanedioate	meso-2,6-Diaminoheptanedioate	12.6765	11.5132	47.1448	9.52908
LBU1080	4.1.1.20	diaminopimelate decarboxylase	meso-2,6-Diaminoheptanedioate	Lysine	46.5251	24.8766	72.8114	27.5484
Methionine synthesis
LBU0936	2.7.2.4	aspartate kinase	aspartate	4-Phospho-L-aspartate	16.5047	8.43577	45.946	10.4046
LBU1158	2.7.2.4	aspartate kinase	aspartate	4-Phospho-L-aspartate	242.583	251.335	195.009	83.4615
LBU1157	1.2.1.11	Aspartate beta-semialdehyde dehydrogenese	4-Phospho-L-aspartate	L-Aspartate 4-semialdehyde	403.27	388.799	332.804	125.974
LBU1159	1.1.1.3	Homoserine dehydrogenase	L-Aspartate 4-semialdehyde	Homoserine	257.938	235.874	140.607	83.8201
LBU0072	2.3.1.46	Homoserine O-succinyltransferase	Homoserine	O-Succinyl-L-homoserine	68.9101	35.8465	53.5035	67.7463
LBU1252	2.3.1.46	Homoserine O-succinyltransferase	Homoserine	O-Succinyl-L-homoserine	52.9309	53.9874	47.1164	42.4015
LBU1137	2.5.1.48	cystathionine gamma-synthase	O-Succinyl-L-homoserine	L-Cystathionine	120.101	76.1401	155.724	33.3349
LBU1137	4.4.1.8	cystathionine beta-lyase	L-Cystathionine	L-Homocysteine	120.101	76.1401	155.724	33.3349
LBU1132	2.1.1.14	5-methyl tetrahydropteroyltriglutamate --homocysteine methyltransferase	Homocysteine	Methionine	237.057	81.8211	449.526	211.473
LBU0247	2.1.1.10	Homocysteine S-methyltransferase	Homocysteine	Methionine	4.25915	13.3688	19.5016	28.9942
Glutamate synthesis
LBU0363	2.6.1.1	aspartate aminotransferase	oxaloacetate	Aspartate	40.4789	22.1031	60.087	53.1855
LBU1079	2.6.1.1	aspartate aminotransferase	oxaloacetate	Aspartate	1746.75	2297.92	996.916	1015.84
LBU0872	6.3.5.5	carbamly-phosphate synthase	glutamine	glutamate	713.112	321.427	1025.49	2927.72
LBU0873	6.3.5.5	carbamly-phosphate synthase	glutamine	glutamate	957.386	547.562	1438.69	3789.19
LBU1725	6.3.5.5	carbamly-phosphate synthase	glutamine	glutamate	59.3412	89.4041	23.478	19.6421
LBU1726	6.3.5.5	carbamly-phosphate synthase	glutamine	glutamate	46.0835	76.489	28.0308	12.471
LBU1236	2.4.2.14	amidophosphoribosyltransferase	glutamine	glutamate	1004.04	219.663	2566.44	1615.74
LBU0420	5.1.1.3	glutamate racemase	L-glutamate	D-glutamate	193.008	392.373	137.306	135.574
Glutamine synthesis
LBU1261	6.3.1.2	Glutamine synthetase	glutamate	Glutamine	1284.01	466.514	1766.92	4883.18
Serine synthesis
LBU0880	1.1.1.95	phosphoglycerate dehydrogenase	3-phosphoglycerate	3-phosphonooxypyruvate	29.2119	7.67362	40.8219	11.216
LBU0881	1.1.1.95	phosphoglycerate dehydrogenase	3-phosphoglycerate	3-phosphonooxypyruvate	34.9666	18.4772	49.7929	23.1307
LBU0882	2.6.1.52	phosphoserine aminotransferase	3-phosphonooxypyruvate	phosphoserine	31.2211	17.4092	27.121	10.392
LBU0835	3.1.3.3	phosphoserine phosphatase	phosphoserine	serine	35.9866	22.0485	27.6757	47.4939
LBU0857	3.1.3.3	phosphoserine phosphatase	phosphoserine	serine	72.9458	72.9298	37.6822	45.0373
Glycine syntehsis
LBU0646	2.6.1.45	serine-glyoxylate transaminase	serine	glycine	298.953	122.519	625.355	445.454
Cysteine synthesis
LBU1139	2.3.1.30	serine O-acetyltransferase	serine	O-Acetyl-L-serine	130.33	72.3131	115.034	81.9392
LBU1138	2.3.1.30	serine O-acetyltransferase	serine	O-Acetyl-L-serine	129.156	74.3916	158.454	37.8468
LBU1136	2.5.1.47	cysteine synthase	O-Acetyl-L-serine	L-Cysteine	80.5988	110.271	151.715	40.529
LBU1253	2.5.1.47	cysteine synthase	O-Acetyl-L-serine	L-Cysteine	112.558	102.075	68.3223	59.2405
Alanine synthesis
LBU0617	2.8.1.7	cysteine desulfurase	L-cysteine	L-alanine	267.413	321.965	517.622	204.348
LBU0646	2.8.1.7	cysteine desulfurase	L-cysteine	L-alanine	298.953	122.519	625.355	445.454
LBU0290	5.1.1.1	alanine racemase	L-alanine	D-alanine	423.14	705.521	431.738	349.847
Arginine synthesis
LBU0739	4.3.2.1	argininosuccinate lyase	L-argininosuccinate	arginine	252.761	355.252	146.424	118.99
LBU0740	4.3.2.1	argininosuccinate lyase	L-argininosuccinate	arginine	444.655	493.335	215.683	127.03
Tyrosine synthesis
LBU0249	5.4.99.5	chorismate mutase	chorismate	prephenate	8.0203	0	5.94705	1.44695
LBU0363	2.6.1.57	aromatic-amino-acid transaminase	4-Hydroxyphenylpyruvate	tyrosine	40.4789	22.1031	60.087	53.1855
Proline
LBU0712	2.7.2.11	glutamate kinase	Glutamate	L-Glutamate 5-phosphate	13.033	37.4574	14.2275	2.26421
Branched-chain amino acids synthesis
LBU1116	2.6.1.42	branched-chain amino acid aminotransferase	(S)-3-Methyl-2-oxopentanoate	L-Isoleucine	810.179	660.433	977.416	699.982
			4-Methyl-2-oxopentanoate	L-Leucine
			2-Oxoisovalerate	L-Valine

## Sheet: Table S7
Table S7. Gene expression profile of protease and transporter systems
			RPKM
	Gene	Product	Control	Lag	logarithmic	stationary
Group1	LBU_1490	amino acid permease(psi)	2.40609	11.4218	5.57536	3.37623
Group1	LBU_0124	ABC-type amino acid transport system ATP-binding protein	100.57	52.4927	204.693	23.2044
Group1	LBU_0125	ABC-type amino acid transport system substrate-binding and permease protein	147.115	106.317	245.305	43.7603
Group1	LBU_0567	amino acid permease	35.9366	28.548	68.527	16.0211
Group1	LBU_1004	pyrrolidone-carboxylate peptidase	171.218	137.587	235.914	79.4524
Group1	LBU_0197	ABC-type amino acid transport system permease protein	46.2079	56.8174	46.2332	8.69268
Group1	LBU_0209	amino acid permease(psi)	5.77639	9.86304	7.36174	1.73688
Group1	LBU_0199	ABC-type amino acid transport system ATP-binding protein	74.9265	59.3477	81.9675	17.135
Group1	LBU_0198	ABC-type amino acid transport system permease protein	112.373	135.688	104.049	36.5061
Group1	LBU_0200	ABC-type amino acid transport system substrate-binding protein	153.49	139.635	139.403	58.6596
Group1	LBU_1036	peptidase T	173.563	119.78	159.174	54.4272
Group1	LBU_1110	ABC-type glutamine transport system ATP-binding protein	413.679	286.311	415.12	141.015
Group1	LBU_0459	amino acid permease(psi)	2.47462	3.59604	3.82277	1.19053
Group1	LBU_1040	putative enterolysin A (Peptidase M23)	52.8875	71.7766	83.6842	32.9409
Group1	LBU_1111	ABC-type glutamine transport system substrate-binding and permease protein	145.104	173.979	275.051	113.027
Group1	LBU_0861	Dipeptidyl aminopeptidases/acylaminoacyl-peptidases	72.1578	83.9449	101.825	71.9651
Group1	LBU_1148	putative membrane-associated Zn-dependent proteases	380.964	443.795	521.412	352.846
Group1	LBU_1250	X-prolyl dipeptidyl peptidase	250.799	244.37	259.208	161.023
Group1	LBU_1556	prolyl aminopeptidase	269.206	283.777	232.489	172.891
Group2	LBU_0100	serine protease HtrA	4006.73	3572.68	1207.99	1167.08
Group2	LBU_0429	ABC-type glutamine transport system permease protein	1383.69	1493.54	659.542	551.274
Group2	LBU_0430	ABC-type glutamine transport system permease protein	1424.86	1463.15	586.988	429.912
Group2	LBU_0117	putative protease HtpX-like protein	450.941	626.38	316.817	294.905
Group2	LBU_0427	ABC-type glutamine transport system ATP-binding protein	1847.84	2422.22	1154.29	1204.78
Group2	LBU_0422	M42 family peptidase	448.594	735.173	314.679	302.681
Group2	LBU_0544	ABC-type spermidine/putrescine transport system ATP-binding protein	213.267	309.496	144.693	124.539
Group2	LBU_0421	putative dipeptidase	999.196	1155.77	538.653	546.454
Group2	LBU_0428	ABC-type glutamine transport system substrate-binding protein	1485.76	1635.53	915.056	831.129
Group2	LBU_0546	ABC-type spermidine/putrescine transport system permease protein	160.481	162.255	94.5661	80.2483
Group2	LBU_0431	ABC-type glutamine transport system substrate-binding protein	1441.8	1535.26	1117.06	686.128
Group2	LBU_0545	ABC-type spermidine/putrescine transport system permease protein	201.987	214.131	126.416	87.9207
Group2	LBU_0547	ABC-type spermidine/putrescine transport system substrate-binding protein	525.652	712.237	344.73	252.976
Group2	LBU_1013	Zn-dependent protease	17.1487	40.1211	14.4641	9.07519
Group2	LBU_1450	Xaa-Pro dipeptidase	23.6963	53.0701	12.4029	10.1429
Group2	LBU_1650	oligoendopeptidase F	1216.99	2012.78	483.841	545.689
Group2	LBU_1679	dipeptidase	1342.93	1766.08	129.905	260.137
Group2	LBU_0477	ATP-dependent Clp protease ATP-binding subunit	852.13	1688.64	204.765	284.169
Group2	LBU_1516	putative dipeptidyl-peptidase	40.8151	104.738	16.1639	25.9954
Group2	LBU_1722	ATP-dependent Clp-like proteinase ATP-binding subunit	2719.54	4824.24	681.156	1351.81
Group3	LBU_0520	D-aminopeptidase	64.3187	140.691	17.1525	137.346
Group3	LBU_0450	amino acid permease	62.2923	61.5192	62.8381	235.166
Group3	LBU_1384	glycoprotein endopeptidase	975.582	1089.51	830.559	2326.45
Group3	LBU_0380	putative Zinc-dependent metalloprotease	42.3149	24.8422	16.4726	30.3328
Group3	LBU_1506	amino acid permease	363.524	310.304	141.315	243.421
Group3	LBU_1567	putative Zn-dependent protease	377.639	749.99	319.146	731.312
Group3	LBU_0172	endopeptidase O	905.703	1180.34	1050.82	1236.06
Group3	LBU_0218	ABC-type oligopeptide transport system substrate-binding protein	230.802	206.953	211.597	294.126
Group3	LBU_0310	endopeptidase Clp ATP-binding chain C	240.951	314.852	374.832	342.41
Group3	LBU_0224	cysteine aminopeptidase	57.726	99.0197	123.337	112.018
Group3	LBU_0498	putative metalloendopeptidase	115.364	210.143	232.871	225.455
Group3	LBU_1187	ABC-type oligopeptide transport system substrate-binding protein	58.9012	96.1968	116.97	96.061
Group3	LBU_1010	ABC-type proline/glycine betaine transport system ATP-binding protein	22.0038	38.0013	23.8461	22.4951
Group3	LBU_1705	dipeptidase	67.9473	116.699	76.0086	63.6876
Group3	LBU_0246	amino acid permease(psi)	30.3283	32.6373	19.9813	33.0266
Group3	LBU_0526	ATP-dependent Clp protease proteolytic subunit	1100.12	1328.26	674.99	895.664
Group3	LBU_1543	prolyl aminopeptidase	94.225	94.5677	53.6251	67.4675
Group3	LBU_1488	putative dipeptidase	921.441	1610.99	732.747	1078.77
Group3	LBU_1009	ABC-type proline/glycine betaine transport system substrate-binding and permease protein	25.7061	30.1831	19.0611	22.4463
Group3	LBU_1083	ATP-dependent protease HslVU ATPase subunit	322.882	432.22	290.594	318.159
Group3	LBU_0671	ATP-dependent Clp protease ATP-binding subunit	453.349	695.039	430.601	547.737
Group3	LBU_1084	ATP-dependent protease HslV	502.283	782.463	490.934	642.513
Group3	LBU_1759	CAAX amino terminal protease family protein	63.0821	86.999	52.6222	76.8736
Group4	LBU_0206	amino acid permease(psi)	104.941	36.8944	138.841	286.838
Group4	LBU_0400	branched-chain amino acid transport system II carrier protein	26.2409	14.914	35.5642	102.328
Group4	LBU_0898	putative amidohydrolase (metal-dependent amidase/aminoacylase/carboxypeptidase )	410.138	146.307	546.918	2595.2
Group4	LBU_0301	peptidase T	5.46839	0.882943	12.6713	4.96934
Group4	LBU_1015	cell wall-associated serine proteinase	927.457	177.098	1950.16	744.991
Group4	LBU_1188	ABC-type oligopeptide transport system substrate-binding protein	1755.82	397.946	3691.02	1785.61
Group4	LBU_1189	ABC-type oligopeptide transport system permease protein	62.5927	14.7028	101.011	46.7166
Group4	LBU_0242	ABC-type amino acid transport system permease protein	55.7055	28.4087	83.0983	102.901
Group4	LBU_0464	type I methionine aminopeptidase	302.214	135.044	506.482	491.842
Group4	LBU_0217	ABC-type oligopeptide transport system substrate-binding protein	65.7628	58.3812	109.606	219.886
Group4	LBU_1462	amino acid permease	211.681	172.866	431.277	558.218
Group4	LBU_0207	aminoacylase (metal-dependent amidase/aminoacylase/carboxypeptidase)	160.609	106.557	187.788	382.462
Group4	LBU_0216	ABC-type oligopeptide transport system substrate-binding protein	73.8152	46.0908	90.7599	147.32
Group4	LBU_1382	O-sialoglycoprotein endopeptidase	212.584	138.741	215.629	337.087
Group4	LBU_0223	cysteine aminopeptidase	522.51	414.413	825.738	977.167
Group4	LBU_1357	Xaa-Pro dipeptidase	597.61	487.182	877.678	1020.81
Group4	LBU_1473	aminopeptidase C	1368.17	918.759	1889.03	2264.98
Group4	LBU_1702	aminopeptidase N	708.167	459.297	1029.17	1294.37
Group4	LBU_0241	ABC-type amino acid transport system ATP-binding protein	39.6203	45.4539	101.278	98.3157
Group4	LBU_0219	ABC-type oligopeptide transport system permease protein	2122.64	1797.18	4826.39	4464.56
Group4	LBU_0220	ABC-type oligopeptide transport system permease protein	957.016	606.823	2206.91	1819.89
Group4	LBU_0222	ABC-type oligopeptide transport system ATP-binding protein	910.67	618.917	2064.61	1687.71
Group4	LBU_0240	ABC-type amino acid transport system substrate-binding protein	105.803	67.2304	160.204	138.012
Group4	LBU_0221	ABC-type oligopeptide transport system ATP-binding protein	1286.82	759.742	2404.53	2006.35
Group4	LBU_0213	ABC-type oligopeptide transport system substrate-binding protein	199.918	117.234	344.47	258.82
Group4	LBU_1517	amino acid permease	60.4594	37.9612	102.719	89.2499
Group4	LBU_1781	ABC-type glutamine transport system substrate-binding and permease protein	303.479	227.27	637.434	436.978
Group4	LBU_0497	Zn-dependent peptidase	35.7768	24.6952	66.6173	36.96
Group4	LBU_1190	ABC-type oligopeptide transport system permease protein	56.2048	27.4617	89.0141	45.7524
Group4	LBU_0214	ABC-type oligopeptide transport system substrate-binding protein	932.547	551.941	3137.23	1450.11
Group4	LBU_1192	ABC-type oligopeptide transport system ATP-binding protein	82.7244	31.3006	220.911	112.168
Group4	LBU_1191	ABC-type oligopeptide transport system ATP-binding protein	129.104	51.5335	239.1	133.658
Group4	LBU_1782	ABC-type glutamine transport system ATP-binding protein	467.931	198.367	861.314	568.089

## Sheet: Table S8
Table S8. Gene expression of unique genes in Lb.bulgaricus 2038 genome
				RPKM				Order*
Gene	Length	Annotation	KO	control	lag	logarithmic	stationary	control	lag	logarithmic	stationary
LBU_0022	258	GNAT family acetyltransferase		63.6495	232.995	50.2863	58.6914	1297	756	1324	1234
LBU_0055	174	inorganic diphosphatase		112.353	41.7967	253.262	103.782	1072	1430	661	984
LBU_0056	351	phosphoglycolate phosphatase		198.28	77.699	320.067	115.22	801	1248	569	925
LBU_0077	1170	tetratricopeptide repeat family protein		41.4382	31.1767	110.826	36.0935	1427	1499	1026	1357
LBU_0147	573	ABC-type sugar transport system permease protein	K15771	24.5648	25.5827	8.47493	2.29795	1537	1540	1666	1730
LBU_0196	225	transcriptional regulator		31.2792	23.232	32.5353	15.0483	1492	1567	1429	1534
LBU_0206	462	amino acid permease		104.941	36.8944	138.841	286.838	1098	1466	927	564
LBU_0212	207	hypothetical protein		230.438	191.587	442.231	462.536	735	836	418	384
LBU_0238	174	hypothetical protein		4.49413	7.83688	4.1655	0	1726	1692	1737	1783
LBU_0253	510	putative hydrolase		58.2651	36.5414	9.94819	34.8546	1324	1468	1653	1361
LBU_0306	162	O-acetylhomoserine sulfhydrylase		14.4811	104.516	85.4544	35.4146	1628	1143	1142	1360
LBU_0353	228	bacterial extracellular solute-binding s, 5 Middle family protein		6.85947	11.4632	5.72208	1.65004	1697	1662	1708	1743
LBU_0357	231	major facilitator transporter		297.897	374.355	102.601	147.389	609	557	1063	825
LBU_0362	204	hypothetical protein		49.832	99.709	45.8327	76.0715	1377	1165	1354	1133
LBU_0378	210	putative membrane protein		0	2.16447	5.52226	12.5403	1761	1740	1715	1570
LBU_0405	282	maltose O-acetyltransferase		38.8217	35.4605	48.0627	25.6809	1442	1475	1336	1434
LBU_0409	336	transcriptional antiterminator		37.2371	94.3575	73.5582	115.046	1453	1196	1196	928
LBU_0410	210	mannitol-1-phosphate 5-dehydrogenase	K00009	74.4742	31.3849	55.2226	147.796	1241	1497	1297	823
LBU_0411	240	mannitol-1-phosphate 5-dehydrogenase		32.5825	65.34	37.4478	81.1199	1483	1306	1401	1103
LBU_0415	594	alpha-ketoglutarate transporter	K03761	7.89878	1.33913	3.90463	7.7585	1686	1750	1740	1645
LBU_0416	327	alpha-ketoglutarate transporter		2.39137	0.695014	4.21136	6.9029	1750	1765	1736	1655
LBU_0447	300	sortase		735.061	370.071	522.578	395.018	303	561	371	444
LBU_0528	207	ABC superfamily ATP binding cassette transporter, binding protein		0	0	3.85158	1.36307	1763	1781	1741	1750
LBU_0535	219	acetyltransferase		610.587	469.587	104.583	247.799	355	465	1048	618
LBU_0536	300	GNAT family acetyltransferase		1079.13	1576.87	189.655	378.403	226	162	780	462
LBU_0552	339	putative esterase		64.5883	44.5824	33.3535	75.1861	1291	1417	1427	1137
LBU_0686	1641	phosphoenolpyruvate carboxykinase	K01610	17.6315	8.24043	17.0488	5.33019	1596	1689	1571	1673
LBU_0701	177	hypothetical protein		547.827	421.155	446.344	279.499	389	507	415	574
LBU_0710	243	putative GntR family transcription regulator		904.264	942.281	167.628	209.004	265	253	841	699
LBU_0711	327	putative GntR family transcription regulator		325.227	446.547	44.5517	101.53	566	483	1366	995
LBU_0712	540	glutamate 5-kinase	K00931	13.033	37.4574	14.2275	2.26421	1641	1460	1598	1731
LBU_0719	516	acyltransferase		25.7629	8.36846	59.6974	23.6953	1530	1688	1271	1450
LBU_0739	396	argininosuccinate lyase		252.761	355.252	146.424	118.99	689	578	898	917
LBU_0740	867	argininosuccinate lyase	K01755	444.655	493.335	215.683	127.03	453	444	724	886
LBU_0744	2010	csn1 family CRISPR-associated protein		158.73	170.17	288.44	175.704	919	893	607	763
LBU_0745	216	csn1 family CRISPR-associated protein		83.2663	147.304	325.152	234.695	1193	970	559	641
LBU_0746	1890	csn1 family CRISPR-associated protein		227.974	157.045	311.969	169.741	739	932	577	776
LBU_0747	711	CRISPR-associated protein		107.783	84.8665	122.532	33.7317	1085	1224	985	1372
LBU_0774	399	hypothetical protein		3.9197	21.0751	7.62944	8.25018	1733	1585	1680	1635
LBU_0778	270	alcohol dehydrogenase		2.89622	1.26261	1.61066	1.39336	1743	1753	1771	1747
LBU_0779	162	metal-dependent hydrolase		0	2.8058	0.89481	0.580568	1765	1734	1781	1771
LBU_0780	1137	metal-dependent hydrolase	K07047	18.5694	4.29754	6.1834	1.90255	1585	1721	1700	1736
LBU_0782	303	arginine/ornithine antiporter		10.3232	24.0021	7.65462	0.931208	1663	1561	1678	1762
LBU_0783	588	arginine/ornithine antiporter	K03758	26.5979	19.3257	8.50526	12.6362	1518	1599	1665	1568
LBU_0784	501	arginine/ornithine antiporter		59.3118	68.0448	31.3934	18.5851	1320	1297	1441	1491
LBU_0795	204	conserved hypothetical protein		11.4997	0	6.03997	1.38312	1652	1774	1703	1748
LBU_0805	510	ABC-type transport system ATP-binding and permease protein	K06148	0	5.34752	8.95337	10.1429	1766	1713	1661	1607
LBU_0821	546	choloylglycine hydrolase		1.4322	8.94926	4.51338	2.58385	1756	1683	1735	1723
LBU_0827	780	C4-dicarboxylate anaerobic carrier family protein		86.2182	56.8174	231.749	29.0597	1175	1339	693	1404
LBU_0838	309	ABC-type transport system ATP-binding protein		0	0	1.8765	0.913126	1767	1782	1769	1763
LBU_0839	270	ABC-type transport system ATP-binding and permease protein		0	0	3.7582	0.696681	1768	1783	1746	1768
LBU_0859	330	putative esterase		52.132	37.1896	20.8654	28.7856	1364	1462	1531	1408
LBU_0867	975	putative 3,5-cyclic-nucleotide phosphodiesterase		36.8934	86.3625	70.2495	38.7784	1455	1218	1212	1339
LBU_0868	156	serine/threonine protein phosphatase		55.1396	13.8401	52.5013	22.9101	1344	1642	1317	1460
LBU_0880	696	Phosphoglycerate dehydrogenase	K00058	29.2119	7.67362	40.8219	11.216	1506	1695	1383	1588
LBU_0881	492	conserved hypothetical protein		34.9666	18.4772	49.7929	23.1307	1471	1608	1326	1454
LBU_0882	1077	phosphoserine aminotransferase	K00831	31.2211	17.4092	27.121	10.392	1493	1611	1478	1601
LBU_0884	219	ABC-type transport system permease protein		0	9.85873	18.8646	12.8838	1770	1678	1553	1565
LBU_0888	243	hypothetical protein		22.5262	130.937	48.3198	21.2875	1549	1032	1333	1474
LBU_0906	510	methylase involved in ubiquinone/menaquinone biosynthesis		3.06659	0.891254	3.83716	5.34805	1741	1759	1742	1672
LBU_0918	348	hypothetical protein		15.7295	1.30615	1.45792	1.08106	1614	1751	1773	1758
LBU_0919	516	ABC-type transport system permease protein		19.701	41.8423	13.2037	7.6554	1575	1429	1610	1648
LBU_0931	1182	aromatic amino acid specific aminotransferase	K00841	117.098	54.9908	135.148	86.4133	1056	1356	945	1076
LBU_0932	780	dihydrodipicolinate reductase	K00215	125.317	108.973	182.686	125.644	1027	1123	800	891
LBU_0933	930	dihydrodipicolinate synthase	K01714	173.213	98.4835	293.737	160.799	868	1174	600	795
LBU_0934	1155	N-acetyldiaminopimelate deacetylase	K05823	48.7468	6.49342	123.121	23.0448	1385	1703	983	1458
LBU_0935	714	2,3,4,5-tetrahydropyridine-2-carboxylate N-succinyltransferase	K00674	100.759	33.8995	177.849	56.1151	1112	1483	817	1248
LBU_0936	1374	aspartate kinase	K00928	16.5047	8.43577	45.946	10.4046	1608	1687	1352	1600
LBU_0937	987	diaminopimelate epimerase	K01778	12.6765	11.5132	47.1448	9.52908	1644	1660	1341	1616
LBU_0948	516	ABC-type transport system permease protein		21.2165	21.802	8.00647	4.19224	1563	1580	1672	1685
LBU_0949	348	hypothetical protein		22.4707	1.63268	2.29102	3.24317	1552	1747	1763	1712
LBU_0961	510	methylase involved in ubiquinone/menaquinone biosynthesis		7.66647	4.67908	7.81643	10.5117	1691	1719	1675	1597
LBU_0965	450	Rrf2 family protein		114.69	201.512	72.9628	67.9264	1063	811	1198	1176
LBU_0966	186	UDP-glucose 4-epimerase		172.372	210.774	100.926	87.9841	870	798	1071	1067
LBU_0967	291	UDP-glucose 4-epimerase		542.817	534.591	179.082	132.513	392	418	810	871
LBU_0974	177	LysR family transcriptional regulator		0	0.642005	1.22847	1.06273	1776	1768	1778	1760
LBU_0977	930	ABC-type transport system ATP-binding and permease protein		13.4534	26.5148	3.81882	28.2156	1637	1531	1744	1412
LBU_0978	438	ABC-type transport system ATP-binding and permease protein		14.2827	44.6237	6.61915	31.9949	1633	1416	1692	1387
LBU_0994	735	type II restriction-modification system modification subunit		420.247	577.605	284.1	133.464	472	389	614	866
LBU_0995	4446	type II restriction-modification system restriction subunit	K01155	159.175	231.589	140.802	78.2497	916	759	920	1115
LBU_0997	177	hypothetical protein		97.1952	52.0024	20.065	9.03324	1130	1375	1541	1624
LBU_1007	249	conserved hypothetical protein		6.28096	11.8655	30.5637	48.348	1701	1657	1448	1276
LBU_1042	342	methylphosphotriester-DNA alkyltransferase		11.4324	21.265	26.0672	17.8754	1653	1583	1488	1500
LBU_1046	549	conserved hypothetical protein		471.467	901.213	214.534	110.327	434	265	728	949
LBU_1050	564	type I restriction-modification system specificity subunit		52.6866	86.2335	36.6254	18.01	1360	1219	1403	1499
LBU_1051	789	hypothetical protein		915.778	742.011	404.931	251.997	261	315	464	612
LBU_1052	876	hypothetical protein		219.597	283.828	224.968	133.455	751	673	708	867
LBU_1053	1002	hypothetical protein		188.861	154.121	173.242	120.24	829	943	826	910
LBU_1054	900	DNA helicase		117.297	125.882	97.6865	57.6852	1053	1051	1085	1241
LBU_1055	2130	DNA helicase		110.872	106.326	131.178	111.935	1078	1131	953	942
LBU_1060	270	conserved hypothetical protein		0	6.73392	1.34222	0	1779	1701	1776	1788
LBU_1061	222	conserved hypothetical protein		0	0	0.65297	0.847315	1780	1788	1785	1765
LBU_1078	312	Preprotein translocase SecY family protein		115.292	69.2007	89.2057	115.153	1062	1291	1124	927
LBU_1081	381	hypothetical protein		537.739	499.874	27.2036	17.033	397	441	1476	1512
LBU_1138	333	serine O-acetyltransferase	K00640	129.156	74.3916	158.454	37.8468	1009	1263	861	1343
LBU_1139	264	serine acetyltransferase		130.33	72.3131	115.034	81.9392	1006	1273	1007	1098
LBU_1182	408	conserved hypothetical protein		42.1656	39.2709	48.6751	25.1266	1423	1443	1332	1439
LBU_1200	720	LPXTG-motif cell wall anchor domain protein		2.17217	37.8783	6.14064	0.783767	1753	1456	1701	1766
LBU_1201	594	peptidase		9.21525	26.7826	10.6157	1.7417	1673	1529	1641	1740
LBU_1202	180	hypothetical protein		0	18.9391	4.83198	0	1783	1604	1730	1782
LBU_1230	156	cystathionine gamma-lyase-like protein		35.0888	335.077	54.3597	27.7333	1470	599	1304	1418
LBU_1298	273	MFS transporter		0	9.15739	4.51338	1.37805	1784	1680	1734	1749
LBU_1316	201	3-phosphoshikimate 1-carboxyvinyltransferase	K00800	11.6713	19.7872	10.4573	0.46792	1650	1598	1645	1774
LBU_1317	234	3-phosphoshikimate 1-carboxyvinyltransferase	K00800	43.4433	95.1813	21.3722	2.41159	1412	1190	1527	1725
LBU_1340	846	phosphoenolpyruvate synthase	K01007	54.5352	81.5323	3.68395	4.11339	1349	1236	1747	1687
LBU_1341	348	phosphoenolpyruvate synthase	K01007	24.7177	58.1236	5.62342	2.70264	1535	1332	1711	1719
LBU_1342	336	phosphoenolpyruvate synthase		97.7474	100.107	10.1385	14.5557	1124	1159	1651	1542
LBU_1407	177	conserved hypothetical protein	K01808	636.187	869.916	149.054	283.75	337	269	890	568
LBU_1424	369	1-deoxyxylulose-5-phosphate synthase	K01662	165.296	289.476	26.1241	131.775	894	663	1487	875
LBU_1425	546	1-deoxyxylulose-5-phosphate synthase	K01662	124.601	129.868	26.2838	68.3858	1032	1039	1484	1173
LBU_1426	405	1-deoxyxylulose-5-phosphate synthase		146.742	122.613	20.9386	57.8246	956	1067	1530	1240
LBU_1427	300	1-deoxyxylulose-5-phosphate synthase		78.1979	39.3934	10.1472	14.1078	1224	1441	1650	1549
LBU_1466	171	hypothetical protein		54.8758	0.664531	3.81472	1.65004	1347	1766	1745	1744
LBU_1501	318	putative sucrose-6-phosphate hydrolase	K01193	7.37716	8.21887	2.50716	11.8304	1692	1690	1761	1577
LBU_1504	786	amylopullulanase	K01200	63.6726	36.1434	92.3055	36.496	1296	1470	1110	1355
LBU_1551	186	oxidoreductase		811.409	1336.13	120.41	193.161	282	189	992	731
LBU_1575	165	ATP-dependent endonuclease of the old family protein		213.267	390.491	70.2833	117.422	770	535	1211	919
LBU_1579	201	peptidase		206.194	150.948	135.584	199.802	787	954	941	716
LBU_1580	636	putative periplasmic protease		45.4925	70.7538	23.932	27.6537	1403	1282	1505	1419
LBU_1581	789	hypothetical protein		84.2437	102.689	46.1151	26.1057	1189	1150	1351	1430
LBU_1584	1056	putative membrane protein		205.122	160.552	330.208	197.723	791	922	550	721
LBU_1586	687	capsular polysaccharide biosynthesis protein		289.116	603.571	462.941	199.33	626	375	405	718
LBU_1587	1263	beta-carotene 15,15'-monooxygenase		97.2057	166.718	171.128	87.6478	1129	900	831	1070
LBU_1588	465	glycerol-3-phosphate cytidylyltransferase	K00980	829.066	407.619	785.742	474.912	279	521	255	374
LBU_1589	912	LPS biosynthesis protein	K07271	350.69	217.426	544.71	346.198	541	783	353	490
LBU_1590	1434	putative polysaccharide repeat unit transport protein	K03328	317.372	211.817	499.877	281.762	575	794	384	570
LBU_1591	1050	putative galactofuranose transferase		332.9	185.387	422.039	220.261	556	849	443	673
LBU_1592	906	putative glycosyltransferase		556.707	352.067	851.676	482.51	382	581	236	368
LBU_1593	1116	UDP-galactopyranose mutase	K01854	400.099	228.39	626.403	451.129	492	767	309	393
LBU_1594	777	putative galactosyl transferase		346.205	275.239	596.535	417.484	547	688	322	423
LBU_1595	669	putative glycosyltransferase	K00996	217.411	154.061	281.035	138.337	757	944	619	846
LBU_1596	510	putative glycosyltransferase		128.797	196.076	337.244	230.52	1014	828	539	652
LBU_1597	405	putative glycosyltransferase		121.641	166.664	200.438	188.104	1038	901	763	741
LBU_1598	1164	LytR family transcriptional regulator of eps operon		521.32	553.042	781.024	743.77	407	404	257	277
LBU_1604	267	bacterial luciferase family protein		117.15	128.956	18.4592	13.3857	1054	1041	1559	1557
LBU_1605	318	bacterial luciferase family protein		322.136	324.467	26.667	27.21	570	613	1480	1426
LBU_1617	210	conserved hypothetical protein	K07484	48.4083	34.0904	45.5586	8.95733	1387	1481	1356	1626
LBU_1618	1452	polysaccharide biosynthesis protein		55.471	56.8174	59.9005	18.2015	1342	1340	1268	1494
LBU_1619	786	conserved hypothetical protein		107.448	151.658	160.359	72.633	1087	951	851	1150
LBU_1620	987	beta(1,4)galactosyltransferase EpsM	K00745	125.18	106.151	146.134	46.3113	1029	1134	899	1287
LBU_1621	1062	exopolysaccharides polymerase		61.8515	46.3313	91.6574	15.6753	1307	1406	1115	1527
LBU_1622	984	beta(1,4)galactosyltransferase EpsJ	K00745	150.992	142.274	243.735	46.3569	940	986	673	1286
LBU_1623	1221	putative glycosyl transferase		158.189	141.741	255.905	49.2983	921	988	655	1269
LBU_1624	1128	putative alpha(1,3)rhamnosyltransferase EpsG		192.722	158.867	352.182	77.4595	818	928	521	1121
LBU_1625	1014	alpha(1,3)galactosyltransferase EpsF		151.923	158.349	235.809	78.2839	938	931	687	1114
LBU_1626	660	phospho-glucosyltransferase EpsE		421.795	369.313	565.451	177.131	469	562	342	760
LBU_1627	777	exopolysaccharide biosynthesis protein	K01104	326.076	457.903	740.561	265.936	564	473	268	592
LBU_1628	768	exopolysaccharide biosynthesis protein	K00903	309.534	362.507	718.945	323.059	587	570	273	517
LBU_1629	855	exopolysaccharide biosynthesis protein		267.977	179.423	384.693	145.753	668	865	483	829
LBU_1630	1041	transcriptional regulator of eps operon		206.575	243.098	378.69	158.47	785	740	489	802
LBU_1651	579	lactate oxidase	K10530	24.3102	40.2334	8.01157	119.555	1538	1437	1671	913
LBU_1652	174	hypothetical protein		31.4589	40.4906	9.99719	104.322	1490	1436	1652	981
LBU_1680	168	hypothetical protein		586.485	158.953	178.179	93.4922	369	927	815	1033
LBU_1682	645	membrane protein		46.0701	61.1338	76.0755	44.9117	1398	1321	1180	1297
LBU_1683	699	membrane protein		92.8531	77.5448	122.044	45.2095	1145	1249	986	1294
LBU_1697	327	putative NAD(P)H nitroreductase	K00540	4.78275	28.4956	1.3299	2.58859	1723	1513	1777	1722
LBU_1710	186	hypothetical protein		21.021	60.4831	31.174	100.626	1565	1322	1443	1001
LBU_1740	837	LysR family transcriptional regulator		366.232	665.789	45.2024	15.9563	522	348	1360	1525
LBU_1741	465	riboflavin synthase beta subunit	K00794	10.0901	45.4539	8.10525	0.404525	1666	1413	1670	1775
LBU_1742	1053	GTP cyclohydrolase II	K14652	11.1393	28.2738	14.1105	4.37659	1657	1519	1601	1682
LBU_1743	213	riboflavin synthase alpha subunit		18.3563	2.13399	14.632	6.18182	1589	1741	1595	1662
LBU_1744	324	riboflavin-specific deaminase	K11752	0	6.66377	15.2118	0.870852	1789	1702	1585	1764
LBU_1748	258	hypothetical protein		248.536	51.9725	32.0259	18.9562	695	1376	1433	1488
LBU_1776	168	conserved hypothetical protein		4.65464	31.1143	1.72571	0	1725	1500	1770	1786
* Order represent the expression level of the gene in whole genome, 1 means the most abundantly expressed gene.

## Sheet: Table S9
Table S9. Oepron structure of Lb.bulgaricus 2038 genome
Operon	Start	Stop	Strand	Number of Genes	Pathway	Genes
Operon_001	3118	8979	+	4		LBU_0003, LBU_0004, LBU_0005, LBU_0006
Operon_002	9195	10367	+	3		LBU_0007, LBU_0008, LBU_0009
Operon_003	10496	14401	+	3		LBU_0010, LBU_0011, LBU_0012
Operon_004	22451	23853	+	2		LBU_0019, LBU_0020
Operon_005	26956	28380	+	2		LBU_0023, LBU_0024
Operon_006	31320	33098	+	3		LBU_0026, LBU_0027, LBU_0028
Operon_007	33238	33821	+	2		LBU_0029, LBU_0030
Operon_008	41679	42890	+	2		LBU_0034, LBU_0035
Operon_009	44377	45920	+	2		LBU_0038, LBU_0039
Operon_010	49404	52336	+	2		LBU_0043, LBU_0044
Operon_011	54672	55906	+	2		LBU_0048, LBU_0049
Operon_012	61083	62397	+	3		LBU_0054, LBU_0055, LBU_0056
Operon_013	62542	63886	+	2		LBU_0057, LBU_0058
Operon_014	66253	70446	+	4		LBU_0061, LBU_0062, LBU_0063, LBU_0064
Operon_015	73244	74478	-	2		LBU_0067, LBU_0068
Operon_016	75071	76459	-	2		LBU_0070, LBU_0071
Operon_017	79796	84088	-	3		LBU_0075, LBU_0076, LBU_0077
Operon_018	88231	89357	+	2		LBU_0081, LBU_0082
Operon_019	98547	102035	-	5		LBU_0090, LBU_0091, LBU_0092, LBU_0093, LBU_0094
Operon_020	102294	108118	+	5		LBU_0095, LBU_0096, LBU_0097, LBU_0098, LBU_0099
Operon_021	114700	116733	-	2		LBU_0107, LBU_0108
Operon_022	119562	121998	+	3		LBU_0111, LBU_0112, LBU_0113
Operon_023	124429	125899	-	2		LBU_0117, LBU_0118
Operon_024	130528	130923	+	2		LBU_0122, LBU_0123
Operon_025	130968	133316	-	2		LBU_0124, LBU_0125
Operon_026	136131	138540	-	2		LBU_0130, LBU_0131
Operon_027	140614	143189	+	3		LBU_0134, LBU_0135, LBU_0136
Operon_028	143371	144895	+	2		LBU_0137, LBU_0138
Operon_029	144935	146948	-	2		LBU_0139, LBU_0140
Operon_030	147102	148874	+	2		LBU_0141, LBU_0142
Operon_031	149006	151738	+	3		LBU_0143, LBU_0144, LBU_0145
Operon_032	151897	153039	+	2		LBU_0146, LBU_0147
Operon_033	157627	158774	+	2		LBU_0150, LBU_0151
Operon_034	162928	165313	+	3		LBU_0157, LBU_0158, LBU_0159
Operon_035	167463	172745	+	4		LBU_0161, LBU_0162, LBU_0163, LBU_0164
Operon_036	173111	176379	+	3		LBU_0165, LBU_0166, LBU_0167
Operon_037	176483	176925	+	2		LBU_0168, LBU_0169
Operon_038	178333	180648	+	2		LBU_0171, LBU_0172
Operon_039	184745	185361	+	2		LBU_0176, LBU_0177
Operon_040	185632	188466	+	3		LBU_0178, LBU_0179, LBU_0180
Operon_041	190486	191116	-	2		LBU_0182, LBU_0183
Operon_042	193182	198555	+	4		LBU_0186, LBU_0187, LBU_0188, LBU_0189
Operon_043	198961	199876	+	2		LBU_0190, LBU_0191
Operon_044	201153	205008	+	4		LBU_0192, LBU_0193, LBU_0194, LBU_0195
Operon_045	206568	209504	+	4		LBU_0197, LBU_0198, LBU_0199, LBU_0200
Operon_046	209738	210343	+	3		LBU_0201, LBU_0202, LBU_0203
Operon_047	223688	226947	+	4		LBU_0215, LBU_0216, LBU_0217, LBU_0218
Operon_048	227371	231369	+	4		LBU_0219, LBU_0220, LBU_0221, LBU_0222
Operon_049	231721	234399	-	2		LBU_0223, LBU_0224
Operon_050	238290	239949	+	2		LBU_0229, LBU_0230
Operon_051	240019	241910	-	2		LBU_0231, LBU_0232
Operon_052	242294	246760	+	3		LBU_0233, LBU_0234, LBU_0235
Operon_053	249931	252284	-	3		LBU_0240, LBU_0241, LBU_0242
Operon_054	257336	258736	+	2		LBU_0247, LBU_0248
Operon_055	259226	260679	+	2		LBU_0250, LBU_0251
Operon_056	260802	261633	+	2		LBU_0252, LBU_0253
Operon_057	262275	264846	-	3		LBU_0255, LBU_0256, LBU_0257
Operon_058	270943	272450	-	2		LBU_0265, LBU_0266
Operon_059	275712	277221	+	2		LBU_0269, LBU_0270
Operon_060	281002	285184	+	4		LBU_0272, LBU_0273, LBU_0274, LBU_0275
Operon_061	296138	298966	+	2		LBU_0287, LBU_0288
Operon_062	299051	300591	+	2		LBU_0289, LBU_0290
Operon_063	301567	305632	+	2		LBU_0292, LBU_0293
Operon_064	306009	306742	+	2		LBU_0295, LBU_0296
Operon_065	306790	311295	+	3		LBU_0297, LBU_0298, LBU_0299
Operon_066	311780	314701	+	2		LBU_0300, LBU_0301
Operon_067	317523	318708	+	3		LBU_0303, LBU_0304, LBU_0305
Operon_068	319460	320750	+	2		LBU_0306, LBU_0307
Operon_069	322045	325357	+	4		LBU_0309, LBU_0310, LBU_0311, LBU_0312
Operon_070	325559	332914	+	2		LBU_0313, LBU_0314
Operon_071	334258	337269	+	3		LBU_0316, LBU_0317, LBU_0318
Operon_072	337656	348899	+	24	Ribosome	LBU_0319, LBU_0320, LBU_0321, LBU_0322, LBU_0323, LBU_0324, LBU_0325, LBU_0326, LBU_0327, LBU_0328, LBU_0329, LBU_0330, LBU_0331, LBU_0332, LBU_0333, LBU_0334, LBU_0335, LBU_0336, LBU_0337, LBU_0338, LBU_0339, LBU_0340, LBU_0341, LBU_0342
Operon_073	349056	351213	+	4		LBU_0343, LBU_0344, LBU_0345, LBU_0346
Operon_074	351404	354669	+	4		LBU_0347, LBU_0348, LBU_0349, LBU_0350
Operon_075	354775	355626	+	2		LBU_0351, LBU_0352
Operon_076	356762	358120	+	3		LBU_0353, LBU_0354, LBU_0355
Operon_077	363030	365346	+	2		LBU_0363, LBU_0364
Operon_078	365718	366262	+	2		LBU_0365, LBU_0366
Operon_079	366409	369371	+	3		LBU_0367, LBU_0368, LBU_0369
Operon_080	369534	372101	+	2		LBU_0370, LBU_0371
Operon_081	372153	374685	+	3		LBU_0372, LBU_0373, LBU_0374
Operon_082	379175	380846	+	4		LBU_0377, LBU_0378, LBU_0379, LBU_0380
Operon_083	381084	392050	+	9		LBU_0381, LBU_0382, LBU_0383, LBU_0384, LBU_0385, LBU_0386, LBU_0387, LBU_0388, LBU_0389
Operon_084	392111	394191	+	2		LBU_0390, LBU_0391
Operon_085	396295	397229	-	2		LBU_0394, LBU_0395
Operon_086	397583	400762	+	4		LBU_0396, LBU_0397, LBU_0398, LBU_0399
Operon_087	402303	403515	+	2		LBU_0401, LBU_0402
Operon_088	409586	410046	+	2		LBU_0410, LBU_0411
Operon_089	420850	424234	+	3		LBU_0420, LBU_0421, LBU_0422
Operon_090	424442	425254	+	2		LBU_0423, LBU_0424
Operon_091	425341	426623	-	2		LBU_0425, LBU_0426
Operon_092	427174	430982	+	5		LBU_0427, LBU_0428, LBU_0429, LBU_0430, LBU_0431
Operon_093	431188	436617	+	4		LBU_0432, LBU_0433, LBU_0434, LBU_0435
Operon_094	436757	437654	+	2		LBU_0436, LBU_0437
Operon_095	438366	440657	+	3		LBU_0439, LBU_0440, LBU_0441
Operon_096	440753	442419	+	2		LBU_0442, LBU_0443
Operon_097	445446	445993	+	2		LBU_0445, LBU_0446
Operon_098	449992	453231	+	3		LBU_0451, LBU_0452, LBU_0453
Operon_099	453711	454740	+	2		LBU_0454, LBU_0455
Operon_100	463305	464223	-	2		LBU_0462, LBU_0463
Operon_101	464370	466114	+	2		LBU_0464, LBU_0465
Operon_102	470507	471820	+	2		LBU_0469, LBU_0470
Operon_103	472385	474819	+	2		LBU_0472, LBU_0473
Operon_104	474942	476792	-	2		LBU_0474, LBU_0475
Operon_105	480146	482139	+	2		LBU_0479, LBU_0480
Operon_106	485974	488308	+	3		LBU_0486, LBU_0487, LBU_0488
Operon_107	488394	490515	-	3		LBU_0489, LBU_0490, LBU_0491
Operon_108	490680	500608	+	11		LBU_0492, LBU_0493, LBU_0494, LBU_0495, LBU_0496, LBU_0497, LBU_0498, LBU_0499, LBU_0500, LBU_0501, LBU_0502
Operon_109	505773	508370	+	3		LBU_0507, LBU_0508, LBU_0509
Operon_110	511139	516244	+	6		LBU_0511, LBU_0512, LBU_0513, LBU_0514, LBU_0515, LBU_0516
Operon_111	522919	523610	+	2		LBU_0521, LBU_0522
Operon_112	523930	526840	+	3		LBU_0523, LBU_0524, LBU_0525
Operon_113	529881	531009	+	2		LBU_0529, LBU_0530
Operon_114	531358	535646	+	4		LBU_0531, LBU_0532, LBU_0533, LBU_0534
Operon_115	536181	536674	+	2		LBU_0535, LBU_0536
Operon_116	536631	538081	-	2		LBU_0537, LBU_0538
Operon_117	538243	540432	+	3		LBU_0539, LBU_0540, LBU_0541
Operon_118	541165	549080	+	8		LBU_0543, LBU_0544, LBU_0545, LBU_0546, LBU_0547, LBU_0548, LBU_0549, LBU_0550
Operon_119	549229	550431	+	2		LBU_0551, LBU_0552
Operon_120	551578	553868	+	2		LBU_0554, LBU_0555
Operon_121	554020	555539	+	3		LBU_0556, LBU_0557, LBU_0558
Operon_122	555867	559281	+	5		LBU_0559, LBU_0560, LBU_0561, LBU_0562, LBU_0563
Operon_123	563159	564550	+	2		LBU_0568, LBU_0569
Operon_124	565626	566962	+	3		LBU_0571, LBU_0572, LBU_0573
Operon_125	567122	570612	+	6		LBU_0574, LBU_0575, LBU_0576, LBU_0577, LBU_0578, LBU_0579
Operon_126	570828	573049	+	2		LBU_0580, LBU_0581
Operon_127	574107	576394	+	2		LBU_0583, LBU_0584
Operon_128	581031	582514	+	2		LBU_0588, LBU_0589
Operon_129	582892	584170	+	2		LBU_0590, LBU_0591
Operon_130	585728	589269	+	4		LBU_0593, LBU_0594, LBU_0595, LBU_0596
Operon_131	590108	599689	+	13	Oxidative phosphorylation	LBU_0598, LBU_0599, LBU_0600, LBU_0601, LBU_0602, LBU_0603, LBU_0604, LBU_0605, LBU_0606, LBU_0607, LBU_0608, LBU_0609, LBU_0610
Operon_132	600915	602680	-	2		LBU_0613, LBU_0614
Operon_133	605516	608618	+	3		LBU_0617, LBU_0618, LBU_0619
Operon_134	608879	615244	+	5		LBU_0620, LBU_0621, LBU_0622, LBU_0623, LBU_0624
Operon_135	617443	630065	+	13		LBU_0628, LBU_0629, LBU_0630, LBU_0631, LBU_0632, LBU_0633, LBU_0634, LBU_0635, LBU_0636, LBU_0637, LBU_0638, LBU_0639, LBU_0640
Operon_136	630414	636082	+	6		LBU_0641, LBU_0642, LBU_0643, LBU_0644, LBU_0645, LBU_0646
Operon_137	636137	637610	+	2		LBU_0647, LBU_0648
Operon_138	637710	641426	+	3		LBU_0649, LBU_0650, LBU_0651
Operon_139	642981	644883	-	2		LBU_0653, LBU_0654
Operon_140	645861	651394	+	6		LBU_0656, LBU_0657, LBU_0658, LBU_0659, LBU_0660, LBU_0661
Operon_141	651534	655512	+	3		LBU_0662, LBU_0663, LBU_0664
Operon_142	662224	664069	+	2		LBU_0671, LBU_0672
Operon_143	670228	674128	+	3		LBU_0679, LBU_0680, LBU_0681
Operon_144	674513	677175	+	3		LBU_0682, LBU_0683, LBU_0684
Operon_145	686118	687342	-	2		LBU_0687, LBU_0688
Operon_146	692795	698378	+	5		LBU_0693, LBU_0694, LBU_0695, LBU_0696, LBU_0697
Operon_147	702893	705802	+	2		LBU_0702, LBU_0703
Operon_148	711363	712542	+	3		LBU_0709, LBU_0710, LBU_0711
Operon_149	719194	721962	+	2		LBU_0716, LBU_0717
Operon_150	723518	727684	+	6		LBU_0720, LBU_0721, LBU_0722, LBU_0723, LBU_0724, LBU_0725
Operon_151	729937	732526	+	2		LBU_0729, LBU_0730
Operon_152	739999	742858	+	2		LBU_0737, LBU_0738
Operon_153	743132	744418	+	2		LBU_0739, LBU_0740
Operon_154	746400	748941	+	3		LBU_0741, LBU_0742, LBU_0743
Operon_155	757148	760644	+	3		LBU_0748, LBU_0749, LBU_0750
Operon_156	763942	766624	+	2		LBU_0754, LBU_0755
Operon_157	766908	770054	+	2		LBU_0756, LBU_0757
Operon_158	770982	773905	+	2		LBU_0759, LBU_0760
Operon_159	774189	783696	+	12	Fatty acid biosynthesis	LBU_0761, LBU_0762, LBU_0763, LBU_0764, LBU_0765, LBU_0766, LBU_0767, LBU_0768, LBU_0769, LBU_0770, LBU_0771, LBU_0772
Operon_160	785468	786616	+	2		LBU_0775, LBU_0776
Operon_161	794196	795532	+	2		LBU_0779, LBU_0780
Operon_162	796071	797498	+	3		LBU_0782, LBU_0783, LBU_0784
Operon_163	800360	805956	+	5		LBU_0785, LBU_0786, LBU_0787, LBU_0788, LBU_0789
Operon_164	806023	808876	+	2		LBU_0790, LBU_0791
Operon_165	810545	811982	+	3		LBU_0792, LBU_0793, LBU_0794
Operon_166	812371	813568	+	3		LBU_0795, LBU_0796, LBU_0797
Operon_167	814450	819635	+	6		LBU_0799, LBU_0800, LBU_0801, LBU_0802, LBU_0803, LBU_0804
Operon_168	830886	832232	+	2		LBU_0808, LBU_0809
Operon_169	834951	841473	+	7		LBU_0814, LBU_0815, LBU_0816, LBU_0817, LBU_0818, LBU_0819, LBU_0820
Operon_170	843720	844798	+	2		LBU_0824, LBU_0825
Operon_171	846865	849827	-	4		LBU_0828, LBU_0829, LBU_0830, LBU_0831
Operon_172	852061	853677	+	2		LBU_0833, LBU_0834
Operon_173	854801	855512	+	3		LBU_0836, LBU_0837, LBU_0838
Operon_174	855706	857361	+	3		LBU_0839, LBU_0840, LBU_0841
Operon_175	858471	862900	+	2		LBU_0843, LBU_0844
Operon_176	864156	868278	-	4		LBU_0846, LBU_0847, LBU_0848, LBU_0849
Operon_177	868412	878969	+	4		LBU_0850, LBU_0851, LBU_0852, LBU_0853
Operon_178	880453	882556	+	3		LBU_0855, LBU_0856, LBU_0857
Operon_179	882591	883342	-	2		LBU_0858, LBU_0859
Operon_180	886628	889559	-	2		LBU_0862, LBU_0863
Operon_181	889720	890820	+	2		LBU_0864, LBU_0865
Operon_182	891337	893597	+	3		LBU_0866, LBU_0867, LBU_0868
Operon_183	894202	903236	+	7		LBU_0869, LBU_0870, LBU_0871, LBU_0872, LBU_0873, LBU_0874, LBU_0875
Operon_184	908394	910665	-	3		LBU_0880, LBU_0881, LBU_0882
Operon_185	913148	913733	+	2		LBU_0886, LBU_0887
Operon_186	916682	918454	+	2		LBU_0891, LBU_0892
Operon_187	922301	924871	-	3		LBU_0896, LBU_0897, LBU_0898
Operon_188	926313	929451	+	2		LBU_0900, LBU_0901
Operon_189	931802	933204	-	2		LBU_0904, LBU_0905
Operon_190	939264	939652	+	2		LBU_0911, LBU_0912
Operon_191	941081	941817	+	2		LBU_0914, LBU_0915
Operon_192	945594	947002	+	3		LBU_0920, LBU_0921, LBU_0922
Operon_193	947704	950353	+	2		LBU_0924, LBU_0925
Operon_194	951786	953094	+	2		LBU_0926, LBU_0927
Operon_195	956070	957225	-	2		LBU_0929, LBU_0930
Operon_196	957324	962199	-	5		LBU_0931, LBU_0932, LBU_0933, LBU_0934, LBU_0935
Operon_197	962710	965071	+	2		LBU_0936, LBU_0937
Operon_198	968582	969890	-	2		LBU_0940, LBU_0941
Operon_199	971323	973972	-	2		LBU_0942, LBU_0943
Operon_200	974674	976082	-	3		LBU_0945, LBU_0946, LBU_0947
Operon_201	979859	980595	-	2		LBU_0952, LBU_0953
Operon_202	982024	982412	-	2		LBU_0955, LBU_0956
Operon_203	988471	989873	+	2		LBU_0962, LBU_0963
Operon_204	991338	991798	-	2		LBU_0966, LBU_0967
Operon_205	992161	999430	+	4		LBU_0968, LBU_0969, LBU_0970, LBU_0971
Operon_206	1005498	1009443	+	3		LBU_0980, LBU_0981, LBU_0982
Operon_207	1009526	1011223	-	3		LBU_0983, LBU_0984, LBU_0985
Operon_208	1012819	1013806	-	2		LBU_0987, LBU_0988
Operon_209	1016849	1018187	-	2		LBU_0992, LBU_0993
Operon_210	1018318	1023497	-	2		LBU_0994, LBU_0995
Operon_211	1024701	1028725	-	4		LBU_0999, LBU_1000, LBU_1001, LBU_1002
Operon_212	1030698	1031552	-	2		LBU_1006, LBU_1007
Operon_213	1033311	1035758	-	2		LBU_1009, LBU_1010
Operon_214	1048634	1051024	+	2		LBU_1019, LBU_1020
Operon_215	1055526	1061478	-	4		LBU_1024, LBU_1025, LBU_1026, LBU_1027
Operon_216	1066071	1067516	+	2		LBU_1032, LBU_1033
Operon_217	1069821	1072585	-	3		LBU_1036, LBU_1037, LBU_1038
Operon_218	1072729	1073996	+	2		LBU_1039, LBU_1040
Operon_219	1074042	1075135	-	2		LBU_1041, LBU_1042
Operon_220	1084809	1086804	-	2		LBU_1049, LBU_1050
Operon_221	1087146	1088802	-	2		LBU_1051, LBU_1052
Operon_222	1105296	1105804	+	2		LBU_1060, LBU_1061
Operon_223	1106047	1114312	-	6		LBU_1062, LBU_1063, LBU_1064, LBU_1065, LBU_1066, LBU_1067
Operon_224	1114577	1118437	-	6		LBU_1068, LBU_1069, LBU_1070, LBU_1071, LBU_1072, LBU_1073
Operon_225	1121892	1122412	-	2		LBU_1077, LBU_1078
Operon_226	1126218	1129126	-	3		LBU_1082, LBU_1083, LBU_1084
Operon_227	1129235	1131441	-	2		LBU_1085, LBU_1086
Operon_228	1131573	1135218	-	2		LBU_1087, LBU_1088
Operon_229	1135399	1137953	-	3		LBU_1089, LBU_1090, LBU_1091
Operon_230	1138028	1139122	-	2		LBU_1092, LBU_1093
Operon_231	1142938	1143453	-	2		LBU_1098, LBU_1099
Operon_232	1143605	1147116	-	2		LBU_1100, LBU_1101
Operon_233	1155812	1158075	+	2		LBU_1110, LBU_1111
Operon_234	1159155	1162144	+	2		LBU_1113, LBU_1114
Operon_235	1166395	1171705	-	4		LBU_1119, LBU_1120, LBU_1121, LBU_1122
Operon_236	1171827	1176625	-	4		LBU_1123, LBU_1124, LBU_1125, LBU_1126
Operon_237	1187249	1187659	-	2		LBU_1134, LBU_1135
Operon_238	1188460	1190875	+	3		LBU_1136, LBU_1137, LBU_1138
Operon_239	1193765	1198648	-	5		LBU_1141, LBU_1142, LBU_1143, LBU_1144, LBU_1145
Operon_240	1199068	1209231	-	7		LBU_1146, LBU_1147, LBU_1148, LBU_1149, LBU_1150, LBU_1151, LBU_1152
Operon_241	1209381	1211233	-	2		LBU_1153, LBU_1154
Operon_242	1213174	1216642	-	3		LBU_1157, LBU_1158, LBU_1159
Operon_243	1217266	1220809	-	2		LBU_1161, LBU_1162
Operon_244	1223416	1224302	-	2		LBU_1167, LBU_1168
Operon_245	1224490	1230557	-	4		LBU_1169, LBU_1170, LBU_1171, LBU_1172
Operon_246	1235555	1237286	-	3		LBU_1176, LBU_1177, LBU_1178
Operon_247	1237742	1239948	-	3		LBU_1180, LBU_1181, LBU_1182
Operon_248	1241006	1246592	-	3		LBU_1184, LBU_1185, LBU_1186
Operon_249	1250563	1254415	-	4		LBU_1189, LBU_1190, LBU_1191, LBU_1192
Operon_250	1255009	1260117	-	4		LBU_1194, LBU_1195, LBU_1196, LBU_1197
Operon_251	1263728	1264506	-	2		LBU_1201, LBU_1202
Operon_252	1264617	1273633	-	7		LBU_1203, LBU_1204, LBU_1205, LBU_1206, LBU_1207, LBU_1208, LBU_1209
Operon_253	1273696	1274533	-	2		LBU_1210, LBU_1211
Operon_254	1275074	1275482	-	2		LBU_1213, LBU_1214
Operon_255	1276156	1283467	-	9		LBU_1216, LBU_1217, LBU_1218, LBU_1219, LBU_1220, LBU_1221, LBU_1222, LBU_1223, LBU_1224
Operon_256	1284790	1285416	-	2		LBU_1226, LBU_1227
Operon_257	1286055	1286762	-	2		LBU_1229, LBU_1230
Operon_258	1287355	1297130	-	9	Purine metabolism	LBU_1232, LBU_1233, LBU_1234, LBU_1235, LBU_1236, LBU_1237, LBU_1238, LBU_1239, LBU_1240
Operon_259	1297454	1300398	-	3		LBU_1241, LBU_1242, LBU_1243
Operon_260	1300557	1301219	-	2		LBU_1244, LBU_1245
Operon_261	1324938	1325916	-	2		LBU_1262, LBU_1263
Operon_262	1327206	1329133	-	4		LBU_1265, LBU_1266, LBU_1267, LBU_1268
Operon_263	1334258	1338277	-	3		LBU_1271, LBU_1272, LBU_1273
Operon_264	1339794	1341089	+	2		LBU_1276, LBU_1277
Operon_265	1341183	1343481	-	2		LBU_1278, LBU_1279
Operon_266	1343661	1348156	-	6		LBU_1280, LBU_1281, LBU_1282, LBU_1283, LBU_1284, LBU_1285
Operon_267	1348238	1349381	-	3		LBU_1286, LBU_1287, LBU_1288
Operon_268	1357412	1364250	-	6		LBU_1292, LBU_1293, LBU_1294, LBU_1295, LBU_1296, LBU_1297
Operon_269	1364525	1365731	-	3		LBU_1298, LBU_1299, LBU_1300
Operon_270	1370004	1373755	-	5		LBU_1305, LBU_1306, LBU_1307, LBU_1308, LBU_1309
Operon_271	1373861	1374665	+	2		LBU_1310, LBU_1311
Operon_272	1375947	1377282	+	2		LBU_1313, LBU_1314
Operon_273	1379786	1386842	-	5		LBU_1319, LBU_1320, LBU_1321, LBU_1322, LBU_1323
Operon_274	1391491	1392340	-	2		LBU_1330, LBU_1331
Operon_275	1393355	1397051	-	3		LBU_1333, LBU_1334, LBU_1335
Operon_276	1397438	1398285	-	2		LBU_1336, LBU_1337
Operon_277	1401320	1402867	-	3		LBU_1340, LBU_1341, LBU_1342
Operon_278	1403253	1407381	-	2		LBU_1343, LBU_1344
Operon_279	1409641	1412348	-	2		LBU_1347, LBU_1348
Operon_280	1418422	1420099	+	2		LBU_1349, LBU_1350
Operon_281	1420171	1423821	-	5		LBU_1351, LBU_1352, LBU_1353, LBU_1354, LBU_1355
Operon_282	1426249	1427059	-	2		LBU_1358, LBU_1359
Operon_283	1432249	1433260	-	3		LBU_1365, LBU_1366, LBU_1367
Operon_284	1436198	1438511	-	2		LBU_1369, LBU_1370
Operon_285	1438574	1441137	-	2		LBU_1371, LBU_1372
Operon_286	1441230	1447872	-	5		LBU_1373, LBU_1374, LBU_1375, LBU_1376, LBU_1377
Operon_287	1448011	1449935	-	2		LBU_1378, LBU_1379
Operon_288	1453054	1460364	-	11		LBU_1382, LBU_1383, LBU_1384, LBU_1385, LBU_1386, LBU_1387, LBU_1388, LBU_1389, LBU_1390, LBU_1391, LBU_1392
Operon_289	1460494	1461662	-	3		LBU_1393, LBU_1394, LBU_1395
Operon_290	1463714	1468316	-	4		LBU_1397, LBU_1398, LBU_1399, LBU_1400
Operon_291	1469293	1469603	+	2		LBU_1402, LBU_1403
Operon_292	1469734	1472079	-	2		LBU_1404, LBU_1405
Operon_293	1473815	1474559	+	2		LBU_1408, LBU_1409
Operon_294	1477019	1477946	-	2		LBU_1412, LBU_1413
Operon_295	1478549	1479847	+	2		LBU_1414, LBU_1415
Operon_296	1483257	1484461	-	2		LBU_1419, LBU_1420
Operon_297	1484587	1485580	-	3		LBU_1421, LBU_1422, LBU_1423
Operon_298	1485921	1487472	+	4		LBU_1424, LBU_1425, LBU_1426, LBU_1427
Operon_299	1489481	1492077	-	3		LBU_1431, LBU_1432, LBU_1433
Operon_300	1497070	1498974	-	3		LBU_1439, LBU_1440, LBU_1441
Operon_301	1501655	1506721	-	5		LBU_1444, LBU_1445, LBU_1446, LBU_1447, LBU_1448
Operon_302	1510890	1511686	+	2		LBU_1453, LBU_1454
Operon_303	1514251	1518236	-	4		LBU_1458, LBU_1459, LBU_1460, LBU_1461
Operon_304	1519935	1522951	-	3		LBU_1463, LBU_1464, LBU_1465
Operon_305	1529082	1530296	-	2		LBU_1467, LBU_1468
Operon_306	1531501	1533431	-	2		LBU_1470, LBU_1471
Operon_307	1533523	1535260	+	2		LBU_1472, LBU_1473
Operon_308	1537293	1539919	-	5		LBU_1477, LBU_1478, LBU_1479, LBU_1480, LBU_1481
Operon_309	1540074	1543867	+	6		LBU_1482, LBU_1483, LBU_1484, LBU_1485, LBU_1486, LBU_1487
Operon_310	1545583	1546911	+	2		LBU_1489, LBU_1490
Operon_311	1560188	1562712	-	2		LBU_1503, LBU_1504
Operon_312	1576098	1580308	+	2		LBU_1514, LBU_1515
Operon_313	1584146	1587302	-	4		LBU_1519, LBU_1520, LBU_1521, LBU_1522
Operon_314	1598176	1599619	-	2		LBU_1526, LBU_1527
Operon_315	1601328	1602415	-	2		LBU_1529, LBU_1530
Operon_316	1602622	1604288	+	2		LBU_1531, LBU_1532
Operon_317	1604329	1605506	-	2		LBU_1533, LBU_1534
Operon_318	1605801	1606536	-	2		LBU_1535, LBU_1536
Operon_319	1608221	1612031	-	2		LBU_1538, LBU_1539
Operon_320	1612475	1614338	-	2		LBU_1541, LBU_1542
Operon_321	1615316	1616461	-	2		LBU_1544, LBU_1545
Operon_322	1619452	1620259	-	3		LBU_1549, LBU_1550, LBU_1551
Operon_323	1626468	1627993	-	2		LBU_1558, LBU_1559
Operon_324	1628803	1630001	+	2		LBU_1561, LBU_1562
Operon_325	1630063	1633471	-	4		LBU_1563, LBU_1564, LBU_1565, LBU_1566
Operon_326	1633706	1634988	+	2		LBU_1567, LBU_1568
Operon_327	1638495	1639345	-	2		LBU_1572, LBU_1573
Operon_328	1639560	1640732	-	3		LBU_1574, LBU_1575, LBU_1576
Operon_329	1642326	1643246	+	2		LBU_1579, LBU_1580
Operon_330	1649404	1651363	+	2		LBU_1586, LBU_1587
Operon_331	1651431	1654277	-	3		LBU_1588, LBU_1589, LBU_1590
Operon_332	1657831	1660428	-	3		LBU_1593, LBU_1594, LBU_1595
Operon_333	1661187	1662799	-	2		LBU_1597, LBU_1598
Operon_334	1667471	1668088	+	2		LBU_1604, LBU_1605
Operon_335	1671605	1673238	+	3		LBU_1609, LBU_1610, LBU_1611
Operon_336	1683916	1687295	-	3		LBU_1621, LBU_1622, LBU_1623
Operon_337	1688928	1694141	-	6		LBU_1625, LBU_1626, LBU_1627, LBU_1628, LBU_1629, LBU_1630
Operon_338	1695790	1697322	-	3		LBU_1632, LBU_1633, LBU_1634
Operon_339	1701679	1703640	+	2		LBU_1640, LBU_1641
Operon_340	1703673	1704817	-	2		LBU_1642, LBU_1643
Operon_341	1705403	1708642	-	4		LBU_1644, LBU_1645, LBU_1646, LBU_1647
Operon_342	1715320	1717596	-	3		LBU_1654, LBU_1655, LBU_1656
Operon_343	1717862	1721544	-	3		LBU_1657, LBU_1658, LBU_1659
Operon_344	1721706	1725940	-	4		LBU_1660, LBU_1661, LBU_1662, LBU_1663
Operon_345	1726069	1729651	-	2		LBU_1664, LBU_1665
Operon_346	1729789	1735218	-	7		LBU_1666, LBU_1667, LBU_1668, LBU_1669, LBU_1670, LBU_1671, LBU_1672
Operon_347	1735952	1737705	-	2		LBU_1674, LBU_1675
Operon_348	1737858	1738962	-	2		LBU_1676, LBU_1677
Operon_349	1741839	1744678	-	4		LBU_1681, LBU_1682, LBU_1683, LBU_1684
Operon_350	1747816	1749550	-	2		LBU_1688, LBU_1689
Operon_351	1750408	1751555	-	3		LBU_1691, LBU_1692, LBU_1693
Operon_352	1752590	1754509	+	2		LBU_1695, LBU_1696
Operon_353	1756553	1759607	+	2		LBU_1699, LBU_1700
Operon_354	1768532	1771378	-	2		LBU_1707, LBU_1708
Operon_355	1774062	1775573	-	3		LBU_1713, LBU_1714, LBU_1715
Operon_356	1775685	1779447	-	2		LBU_1716, LBU_1717
Operon_357	1779772	1781349	-	2		LBU_1718, LBU_1719
Operon_358	1788916	1795415	-	4		LBU_1725, LBU_1726, LBU_1727, LBU_1728
Operon_359	1801053	1802613	-	2		LBU_1735, LBU_1736
Operon_360	1802678	1804859	-	2		LBU_1737, LBU_1738
Operon_361	1812282	1813874	-	2		LBU_1741, LBU_1742
Operon_362	1813981	1814513	-	2		LBU_1743, LBU_1744
Operon_363	1820746	1823373	-	2		LBU_1745, LBU_1746
Operon_364	1824459	1828964	-	5		LBU_1749, LBU_1750, LBU_1751, LBU_1752, LBU_1753
Operon_365	1829133	1830698	-	2		LBU_1754, LBU_1755
Operon_366	1844985	1849790	+	4		LBU_1768, LBU_1769, LBU_1770, LBU_1771
Operon_367	1853898	1855110	-	2		LBU_1777, LBU_1778
Operon_368	1855307	1856685	+	2		LBU_1779, LBU_1780
Operon_369	1856977	1859203	+	2		LBU_1781, LBU_1782
Operon_370	1860808	1862884	-	2		LBU_1784, LBU_1785
Operon_371	1867883	1871189	-	2		LBU_1789, LBU_1790
Operon_372	1871297	1872531	-	2		LBU_1791, LBU_1792

## Sheet: Table S10
Table S10. Pathway enrichment analysis of operon genes in Lb.bulgaricus 2038 genome
Pathway	Operon Gene Number	Gene Number	Total Operon Gene Number in Pathway	Total Gene Number in Pathway	Pvalue	FDR
00253 Tetracycline biosynthesis	4	4	364	505	0	0
00473 D-Alanine metabolism	4	4	364	505	0	0
04122 Sulfur relay system	4	4	364	505	0	0
00790 Folate biosynthesis	6	6	364	505	0	0
00730 Thiamine metabolism	7	7	364	505	0	0
00900 Terpenoid backbone biosynthesis	11	11	364	505	0	0
01212 Fatty acid metabolism	13	14	364	505	0.00951403	0.0454079
00061 Fatty acid biosynthesis	12	13	364	505	0.0133359	0.0608813
03010 Ribosome	42	51	364	505	0.0252685	0.11055
02010 ABC transporters	43	53	364	505	0.0390656	0.164076
00670 One carbon pool by folate	8	9	364	505	0.0510663	0.206229
00640 Propanoate metabolism	7	8	364	505	0.071292	0.249522
03018 RNA degradation	7	8	364	505	0.071292	0.249522
03060 Protein export	7	8	364	505	0.071292	0.249522
03410 Base excision repair	7	8	364	505	0.071292	0.249522
00780 Biotin metabolism	6	7	364	505	0.0994493	0.326318
00983 Drug metabolism - other enzymes	6	7	364	505	0.0994493	0.326318
00190 Oxidative phosphorylation	9	11	364	505	0.14066	0.42198
00770 Pantothenate and CoA biosynthesis	5	6	364	505	0.138618	0.42198
03070 Bacterial secretion system	5	6	364	505	0.138618	0.42198
03020 RNA polymerase	4	5	364	505	0.193061	0.563095
02060 Phosphotransferase system (PTS)	7	9	364	505	0.233098	0.661493
00051 Fructose and mannose metabolism	10	13	364	505	0.248033	0.685355
00740 Riboflavin metabolism	3	4	364	505	0.268677	0.705277
00920 Sulfur metabolism	3	4	364	505	0.268677	0.705277
00550 Peptidoglycan biosynthesis	12	16	364	505	0.302841	0.775569
00280 Valine, leucine and isoleucine degradation	2	3	364	505	0.373617	0.834704
00450 Selenocompound metabolism	5	7	364	505	0.373629	0.834704
00471 D-Glutamine and D-glutamate metabolism	2	3	364	505	0.373617	0.834704
00627 Aminobenzoate degradation	2	3	364	505	0.373617	0.834704
00750 Vitamin B6 metabolism	2	3	364	505	0.373617	0.834704
04112 Cell cycle - Caulobacter	8	11	364	505	0.366477	0.834704
00300 Lysine biosynthesis	13	18	364	505	0.403327	0.882278
00970 Aminoacyl-tRNA biosynthesis	18	25	364	505	0.425012	0.91074
00040 Pentose and glucuronate interconversions	1	2	364	505	0.519142	0.939826
00230 Purine metabolism	35	49	364	505	0.483828	0.939826
00523 Polyketide sugar unit biosynthesis	1	2	364	505	0.519142	0.939826
00720 Carbon fixation pathways in prokaryotes	12	17	364	505	0.461617	0.939826
00760 Nicotinate and nicotinamide metabolism	4	6	364	505	0.465277	0.939826
00860 Porphyrin and chlorophyll metabolism	1	2	364	505	0.519142	0.939826
03013 RNA transport	1	2	364	505	0.519142	0.939826
03440 Homologous recombination	14	20	364	505	0.497131	0.939826
04066 HIF-1 signaling pathway	1	2	364	505	0.519142	0.939826
00240 Pyrimidine metabolism	28	41	364	505	0.655758	0.982898
00250 Alanine, aspartate and glutamate metabolism	10	15	364	505	0.587616	0.982898
00270 Cysteine and methionine metabolism	13	19	364	505	0.554568	0.982898
00290 Valine, leucine and isoleucine biosynthesis	0	1	364	505	0.720792	0.982898
00510 N-Glycan biosynthesis	0	1	364	505	0.720792	0.982898
00521 Streptomycin biosynthesis	2	4	364	505	0.688438	0.982898
00524 Butirosin and neomycin biosynthesis	0	1	364	505	0.720792	0.982898
00561 Glycerolipid metabolism	4	7	364	505	0.694397	0.982898
00564 Glycerophospholipid metabolism	7	11	364	505	0.630988	0.982898
00623 Toluene degradation	0	1	364	505	0.720792	0.982898
00630 Glyoxylate and dicarboxylate metabolism	4	7	364	505	0.694397	0.982898
00642 Ethylbenzene degradation	0	1	364	505	0.720792	0.982898
00903 Limonene and pinene degradation	0	1	364	505	0.720792	0.982898
00908 Zeatin biosynthesis	0	1	364	505	0.720792	0.982898
01055 Biosynthesis of vancomycin group antibiotics	0	1	364	505	0.720792	0.982898
01210 2-Oxocarboxylic acid metabolism	3	5	364	505	0.571139	0.982898
02020 Two-component system	7	11	364	505	0.630988	0.982898
03420 Nucleotide excision repair	5	8	364	505	0.604866	0.982898
03430 Mismatch repair	11	17	364	505	0.671723	0.982898
00010 Glycolysis / Gluconeogenesis	11	25	364	505	0.997712	0.999881
00020 Citrate cycle (TCA cycle)	1	4	364	505	0.931946	0.999881
00030 Pentose phosphate pathway	8	14	364	505	0.833061	0.999881
00052 Galactose metabolism	4	9	364	505	0.926483	0.999881
00071 Fatty acid degradation	1	3	364	505	0.810192	0.999881
00260 Glycine, serine and threonine metabolism	11	18	364	505	0.788832	0.999881
00330 Arginine and proline metabolism	1	6	364	505	0.992524	0.999881
00340 Histidine metabolism	1	3	364	505	0.810192	0.999881
00350 Tyrosine metabolism	1	6	364	505	0.992524	0.999881
00362 Benzoate degradation	1	4	364	505	0.931946	0.999881
00400 Phenylalanine, tyrosine and tryptophan biosynthesis	0	7	364	505	0.999881	0.999881
00480 Glutathione metabolism	1	5	364	505	0.976986	0.999881
00500 Starch and sucrose metabolism	3	9	364	505	0.983246	0.999881
00520 Amino sugar and nucleotide sugar metabolism	10	18	364	505	0.903998	0.999881
00620 Pyruvate metabolism	11	21	364	505	0.960285	0.999881
00621 Dioxin degradation	0	2	364	505	0.922442	0.999881
00622 Xylene degradation	0	2	364	505	0.922442	0.999881
00624 Polycyclic aromatic hydrocarbon degradation	1	3	364	505	0.810192	0.999881
00625 Chloroalkane and chloroalkene degradation	0	2	364	505	0.922442	0.999881
00626 Naphthalene degradation	0	2	364	505	0.922442	0.999881
00650 Butanoate metabolism	3	6	364	505	0.782863	0.999881
00680 Methane metabolism	12	22	364	505	0.944386	0.999881
00910 Nitrogen metabolism	0	2	364	505	0.922442	0.999881
01200 Carbon metabolism	31	49	364	505	0.897887	0.999881
01220 Degradation of aromatic compounds	0	2	364	505	0.922442	0.999881
01230 Biosynthesis of amino acids	35	64	364	505	0.998906	0.999881
03030 DNA replication	9	15	364	505	0.783127	0.999881
04141 Protein processing in endoplasmic reticulum	0	2	364	505	0.922442	0.999881

[truncated: 6 more sheets: Table S11, Table S12, Table S13, Table S14, Table S15, Table S16]
